# Supplementary material for: Genetics and timing of sex determination in the East African cichlid fish Astatotilapia burtoni
Source: PubMed Central journal article supplement (PMC4278230; doi:10.1186/s12863-014-0140-5), 2014-12-14

*ctnnb1A*

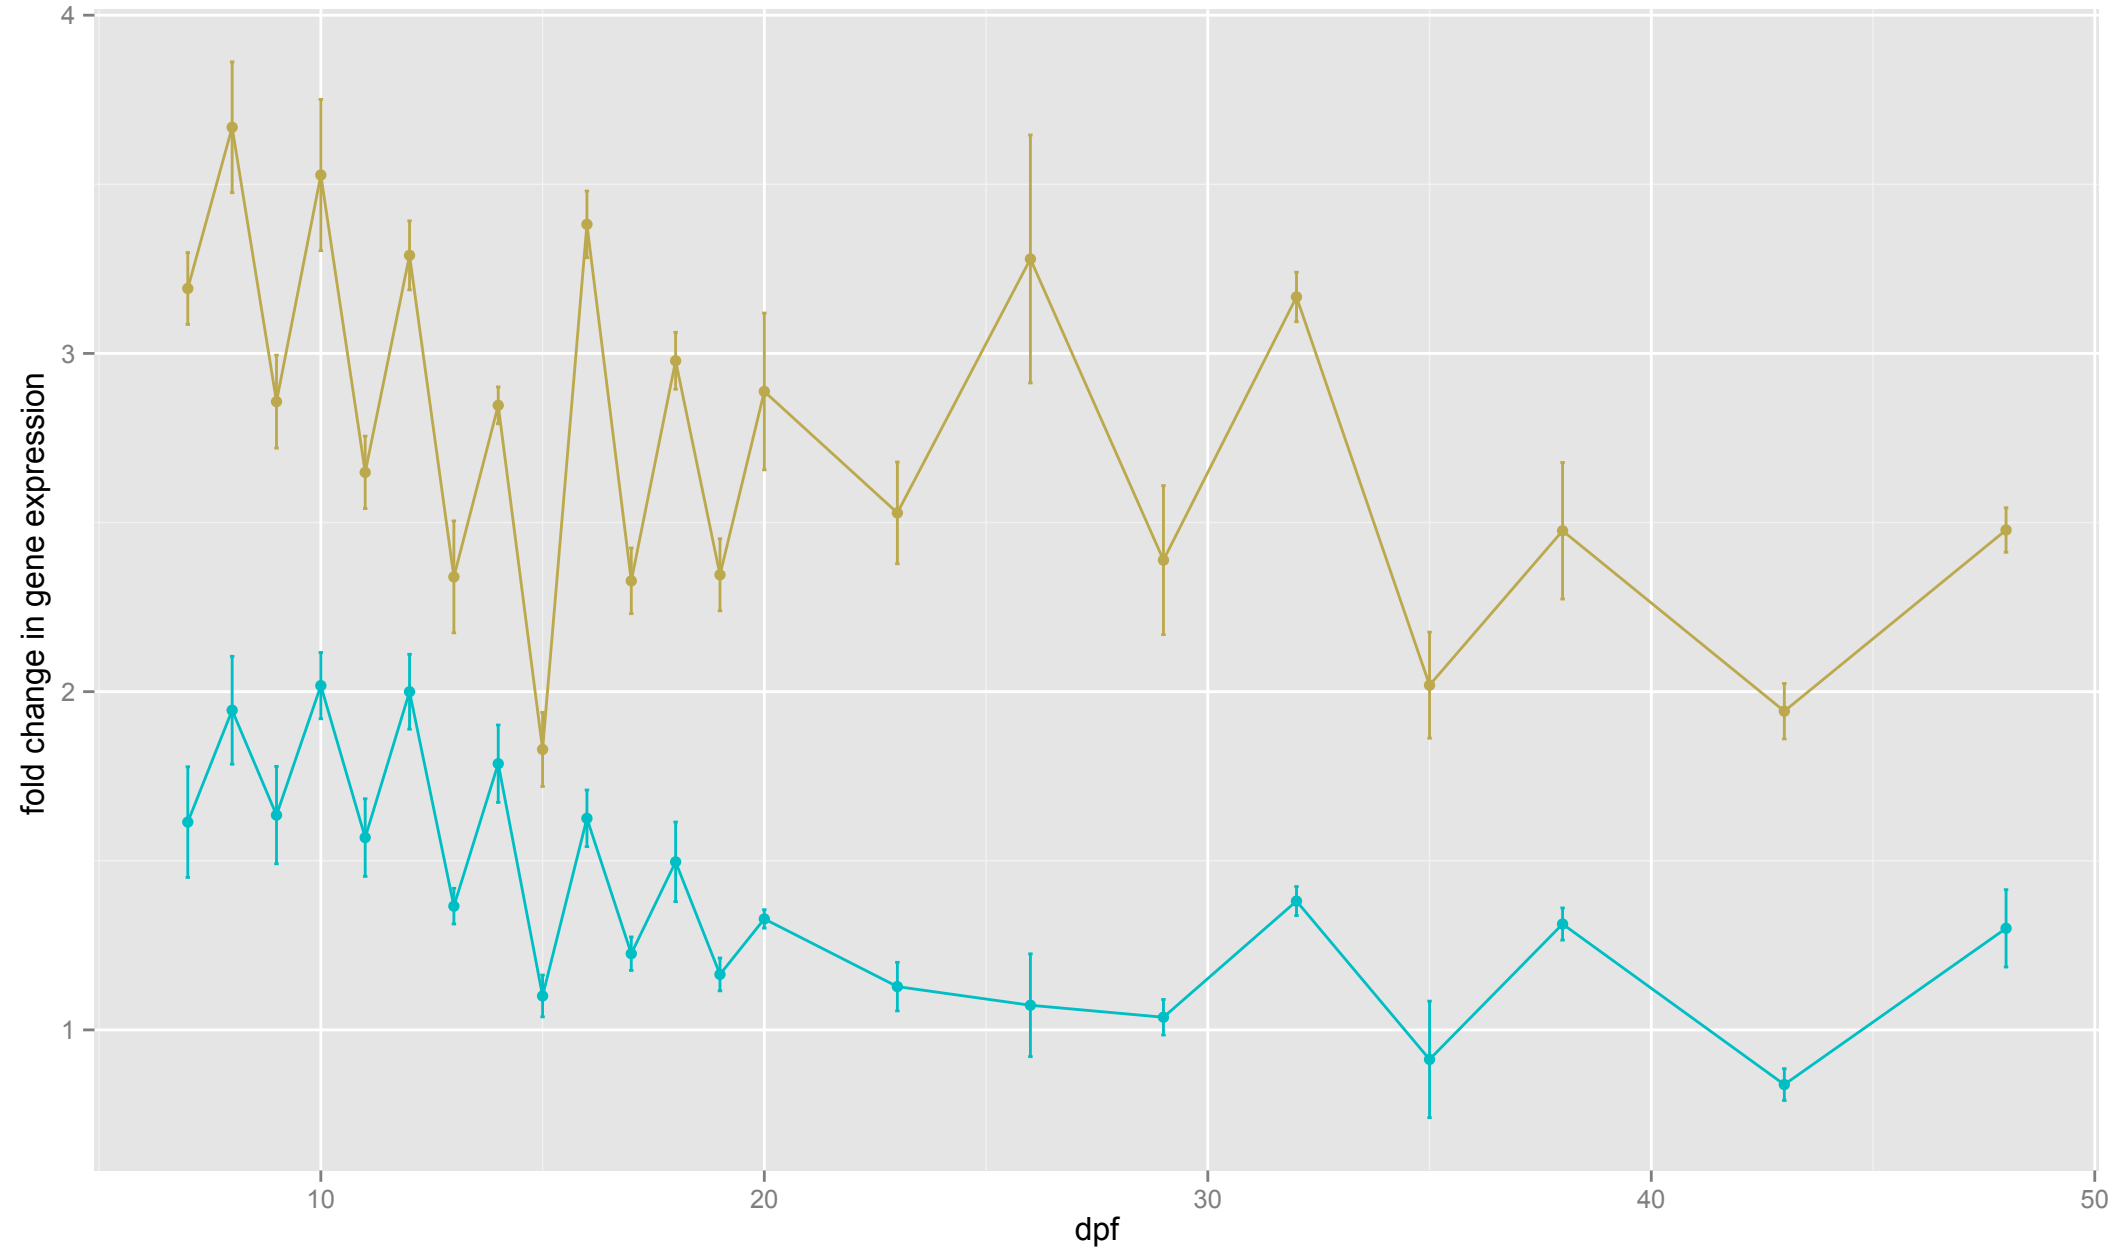

*ctnnb1B*

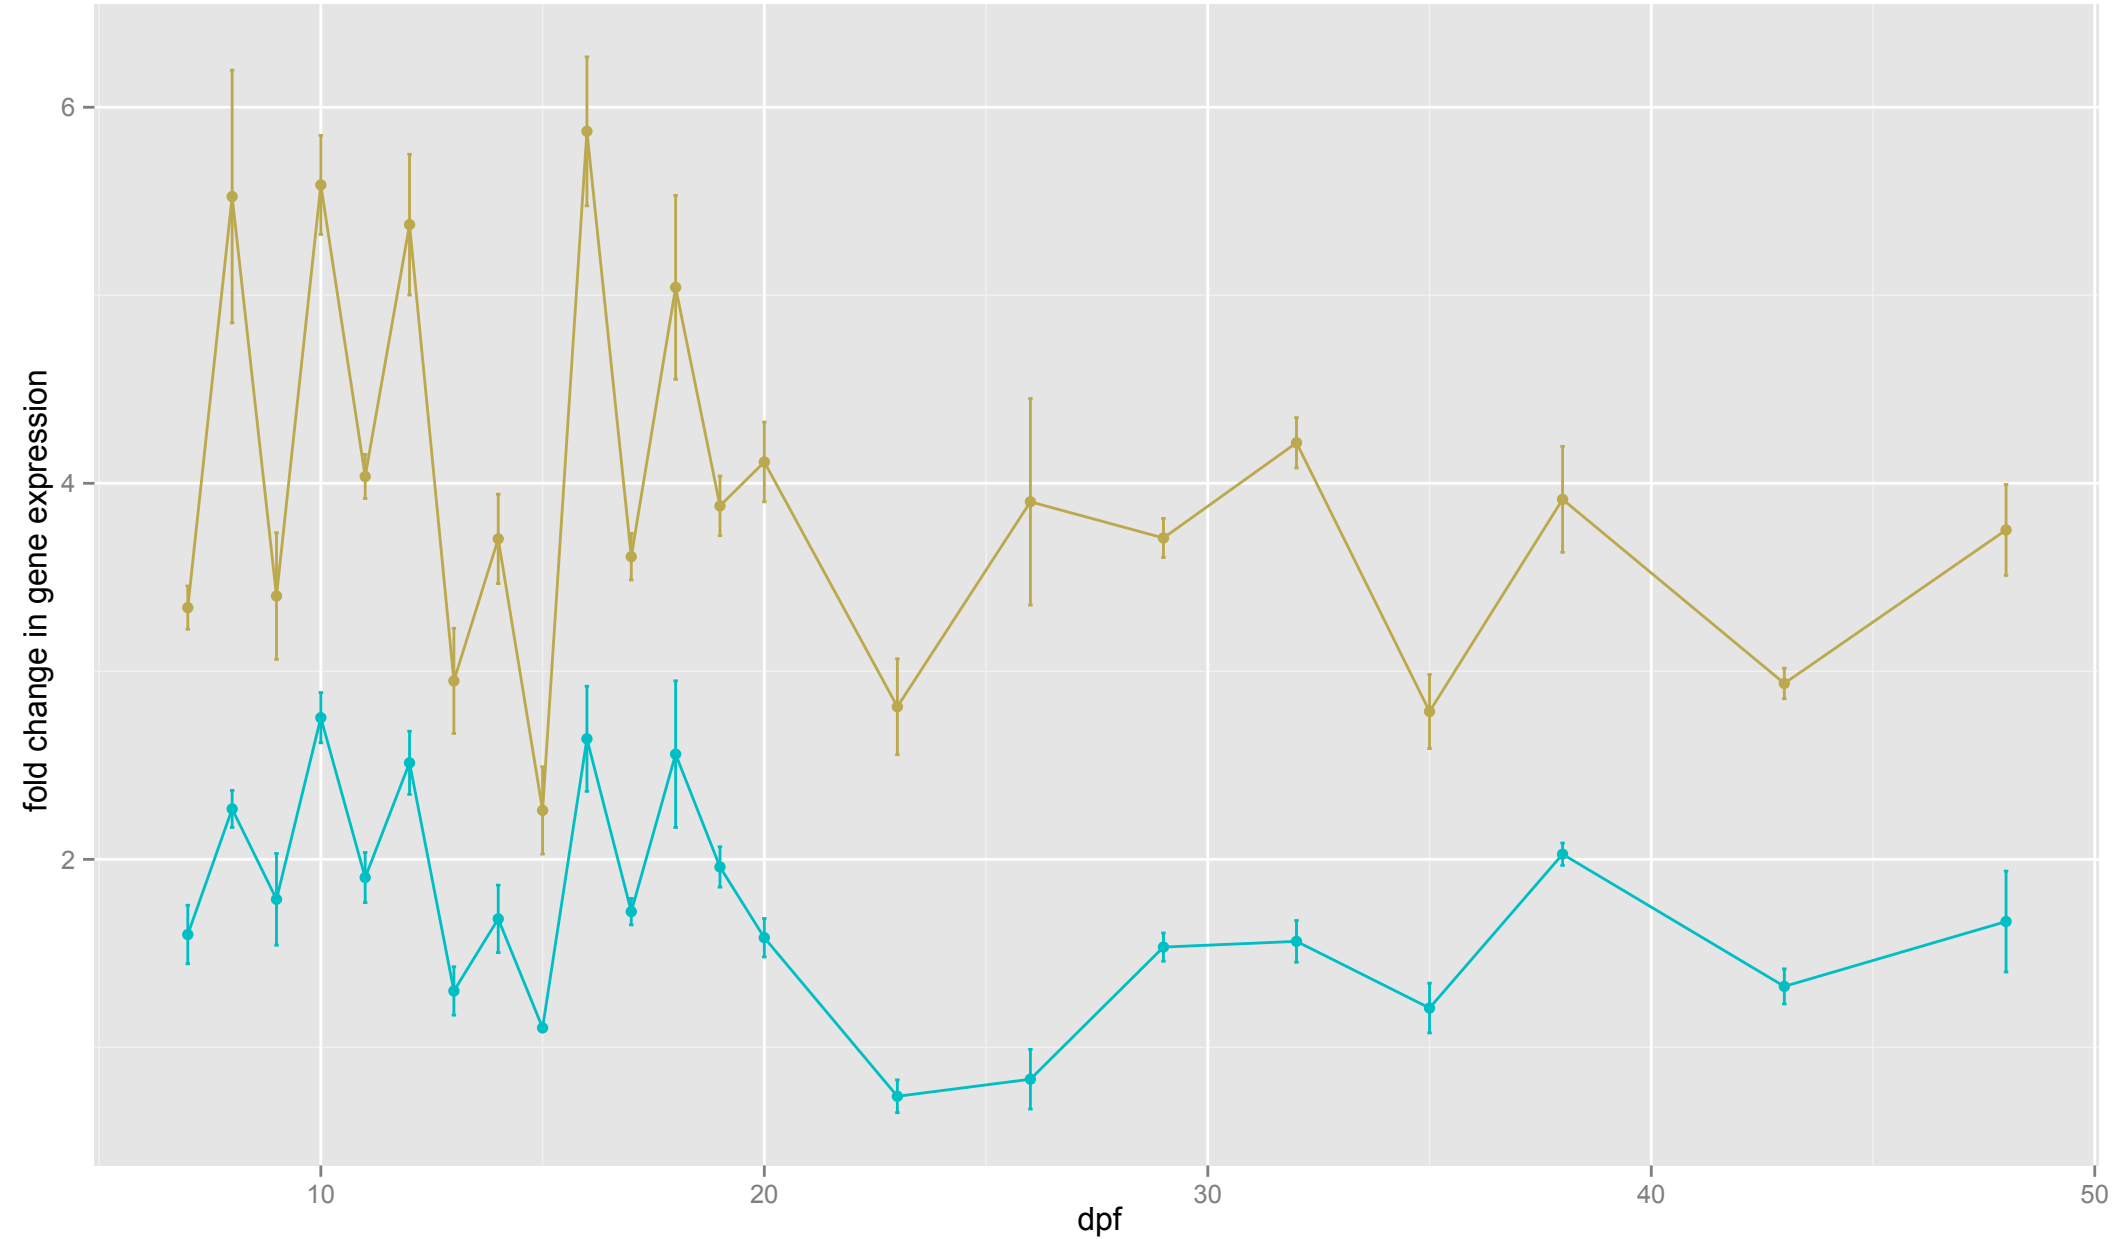

*cyp11b2*

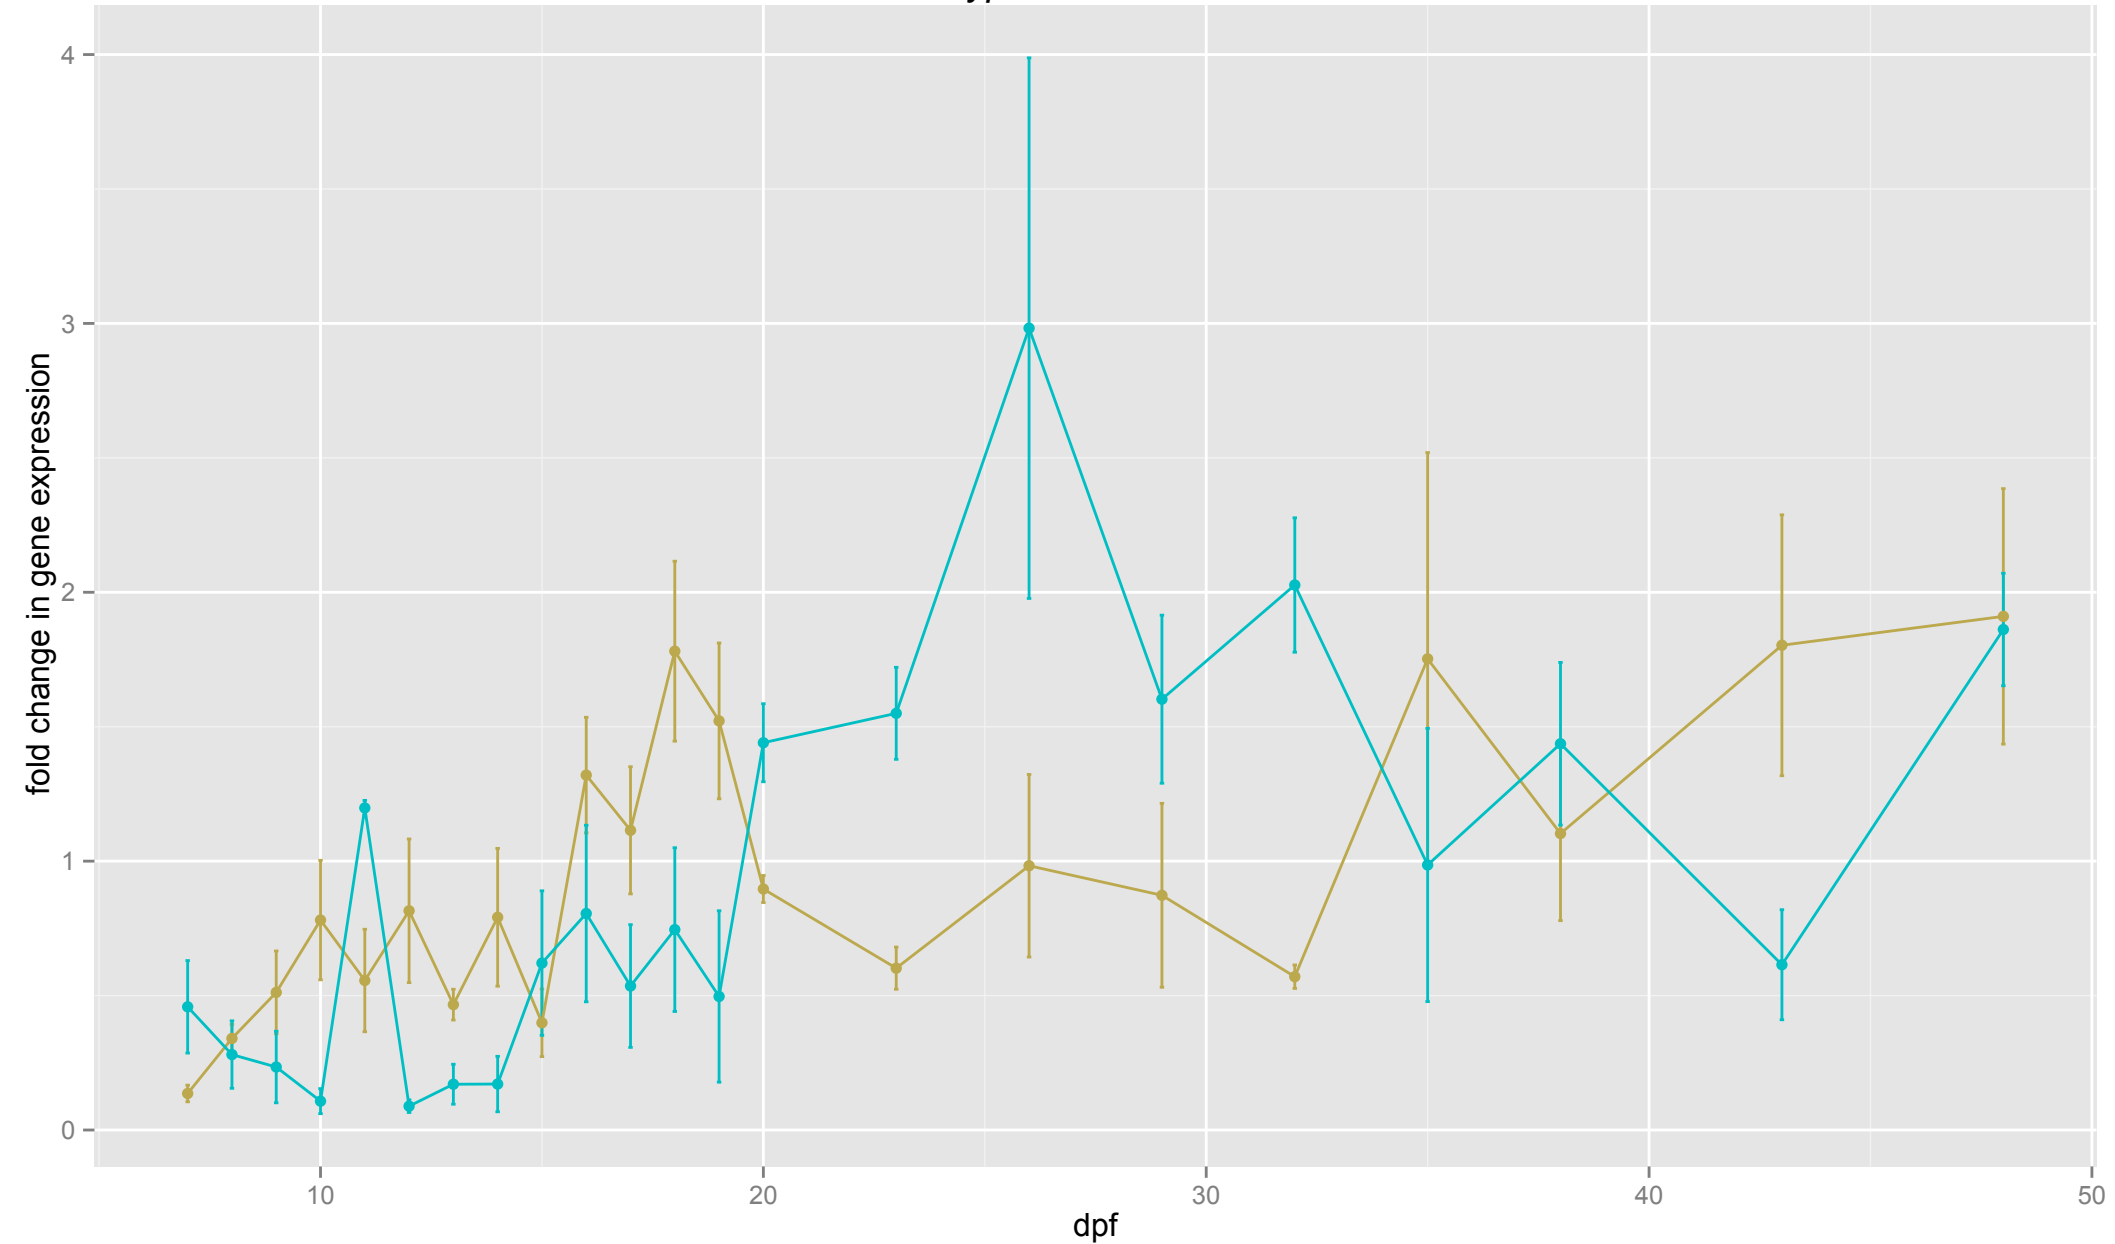

*cyp19a1A*

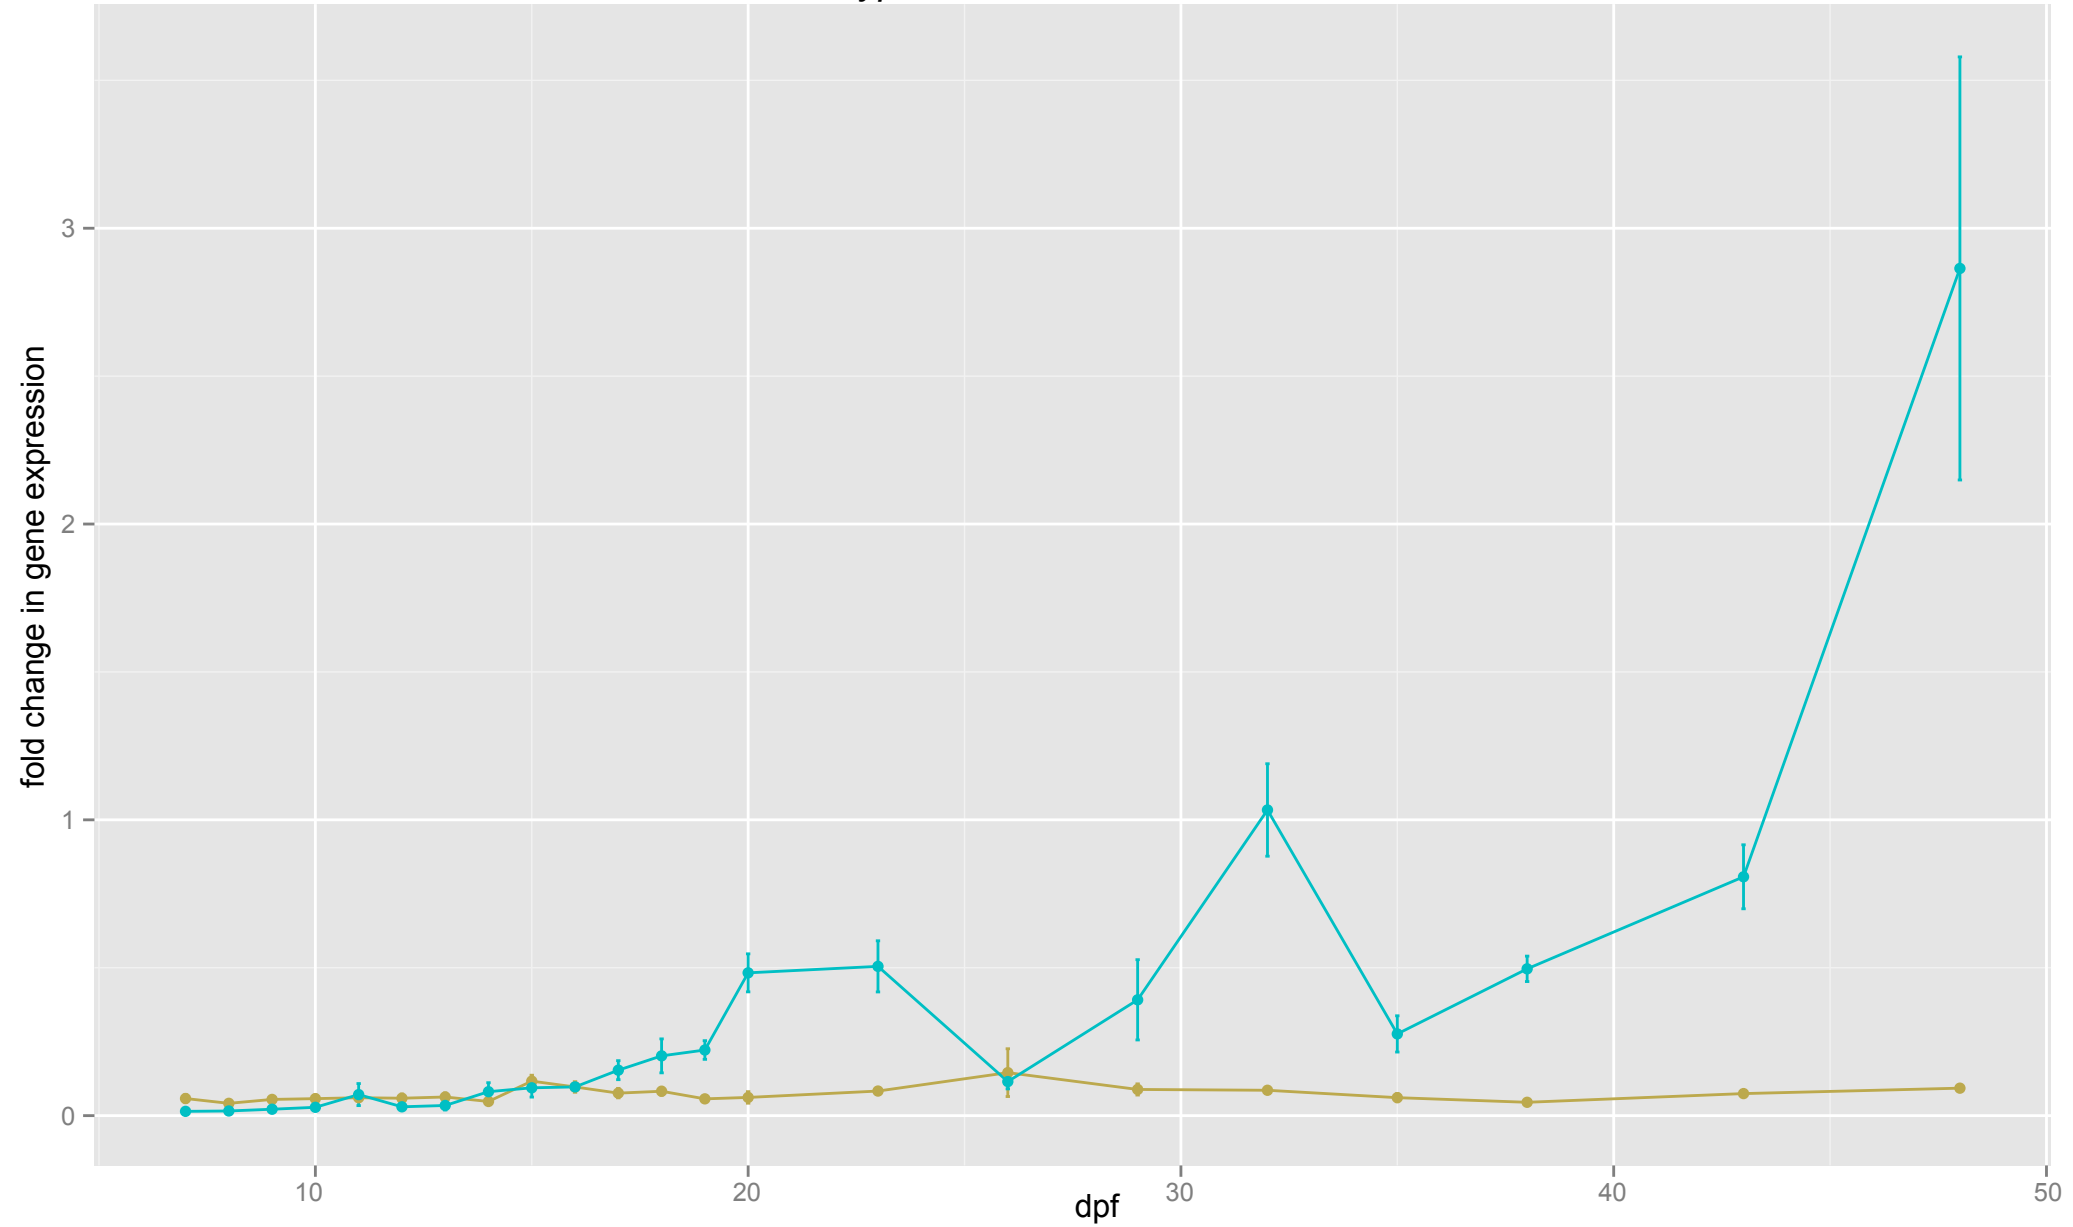

*cyp19a1B*

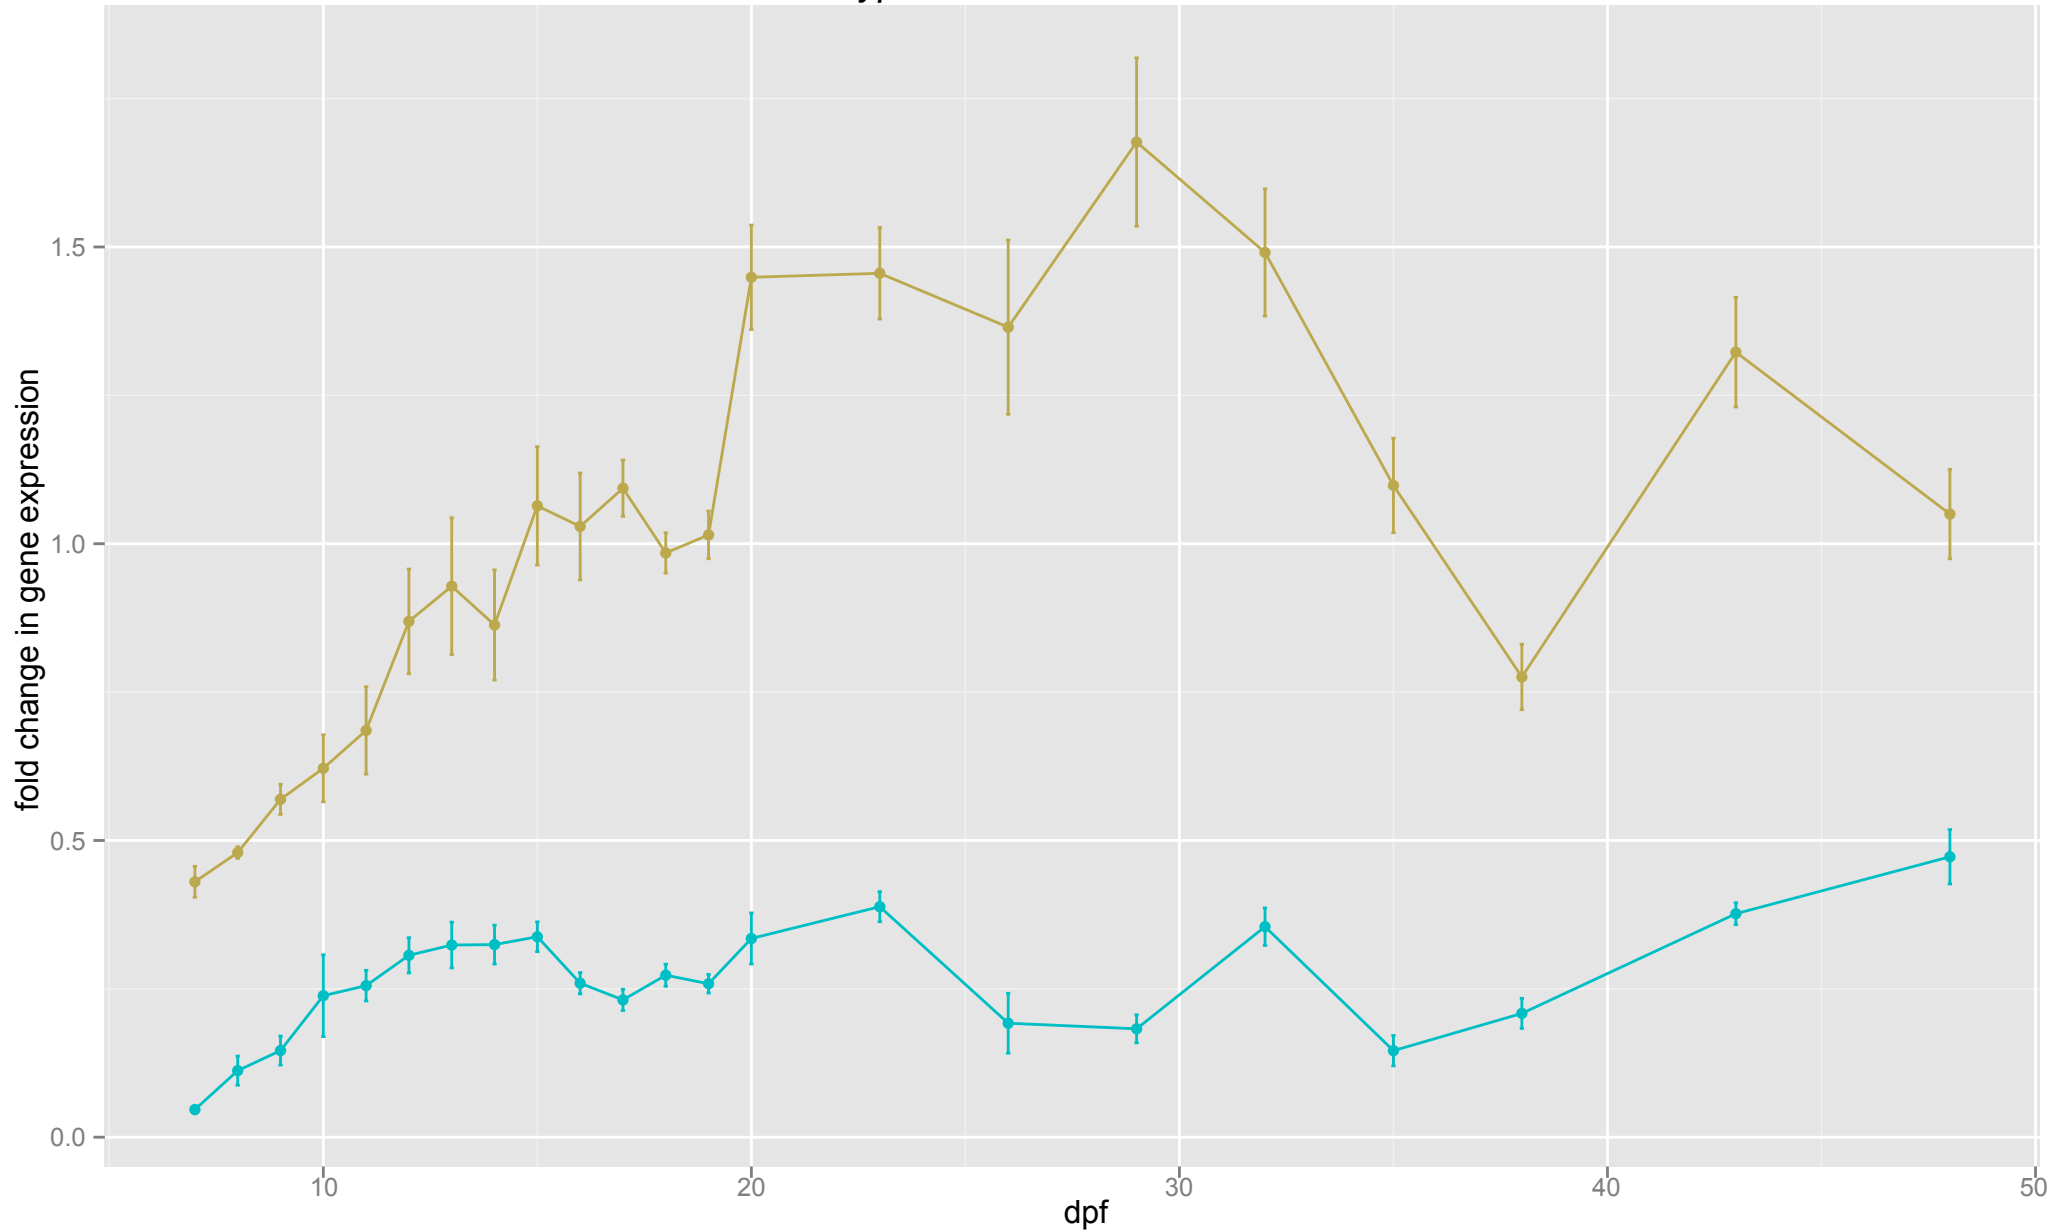

*dax1A*

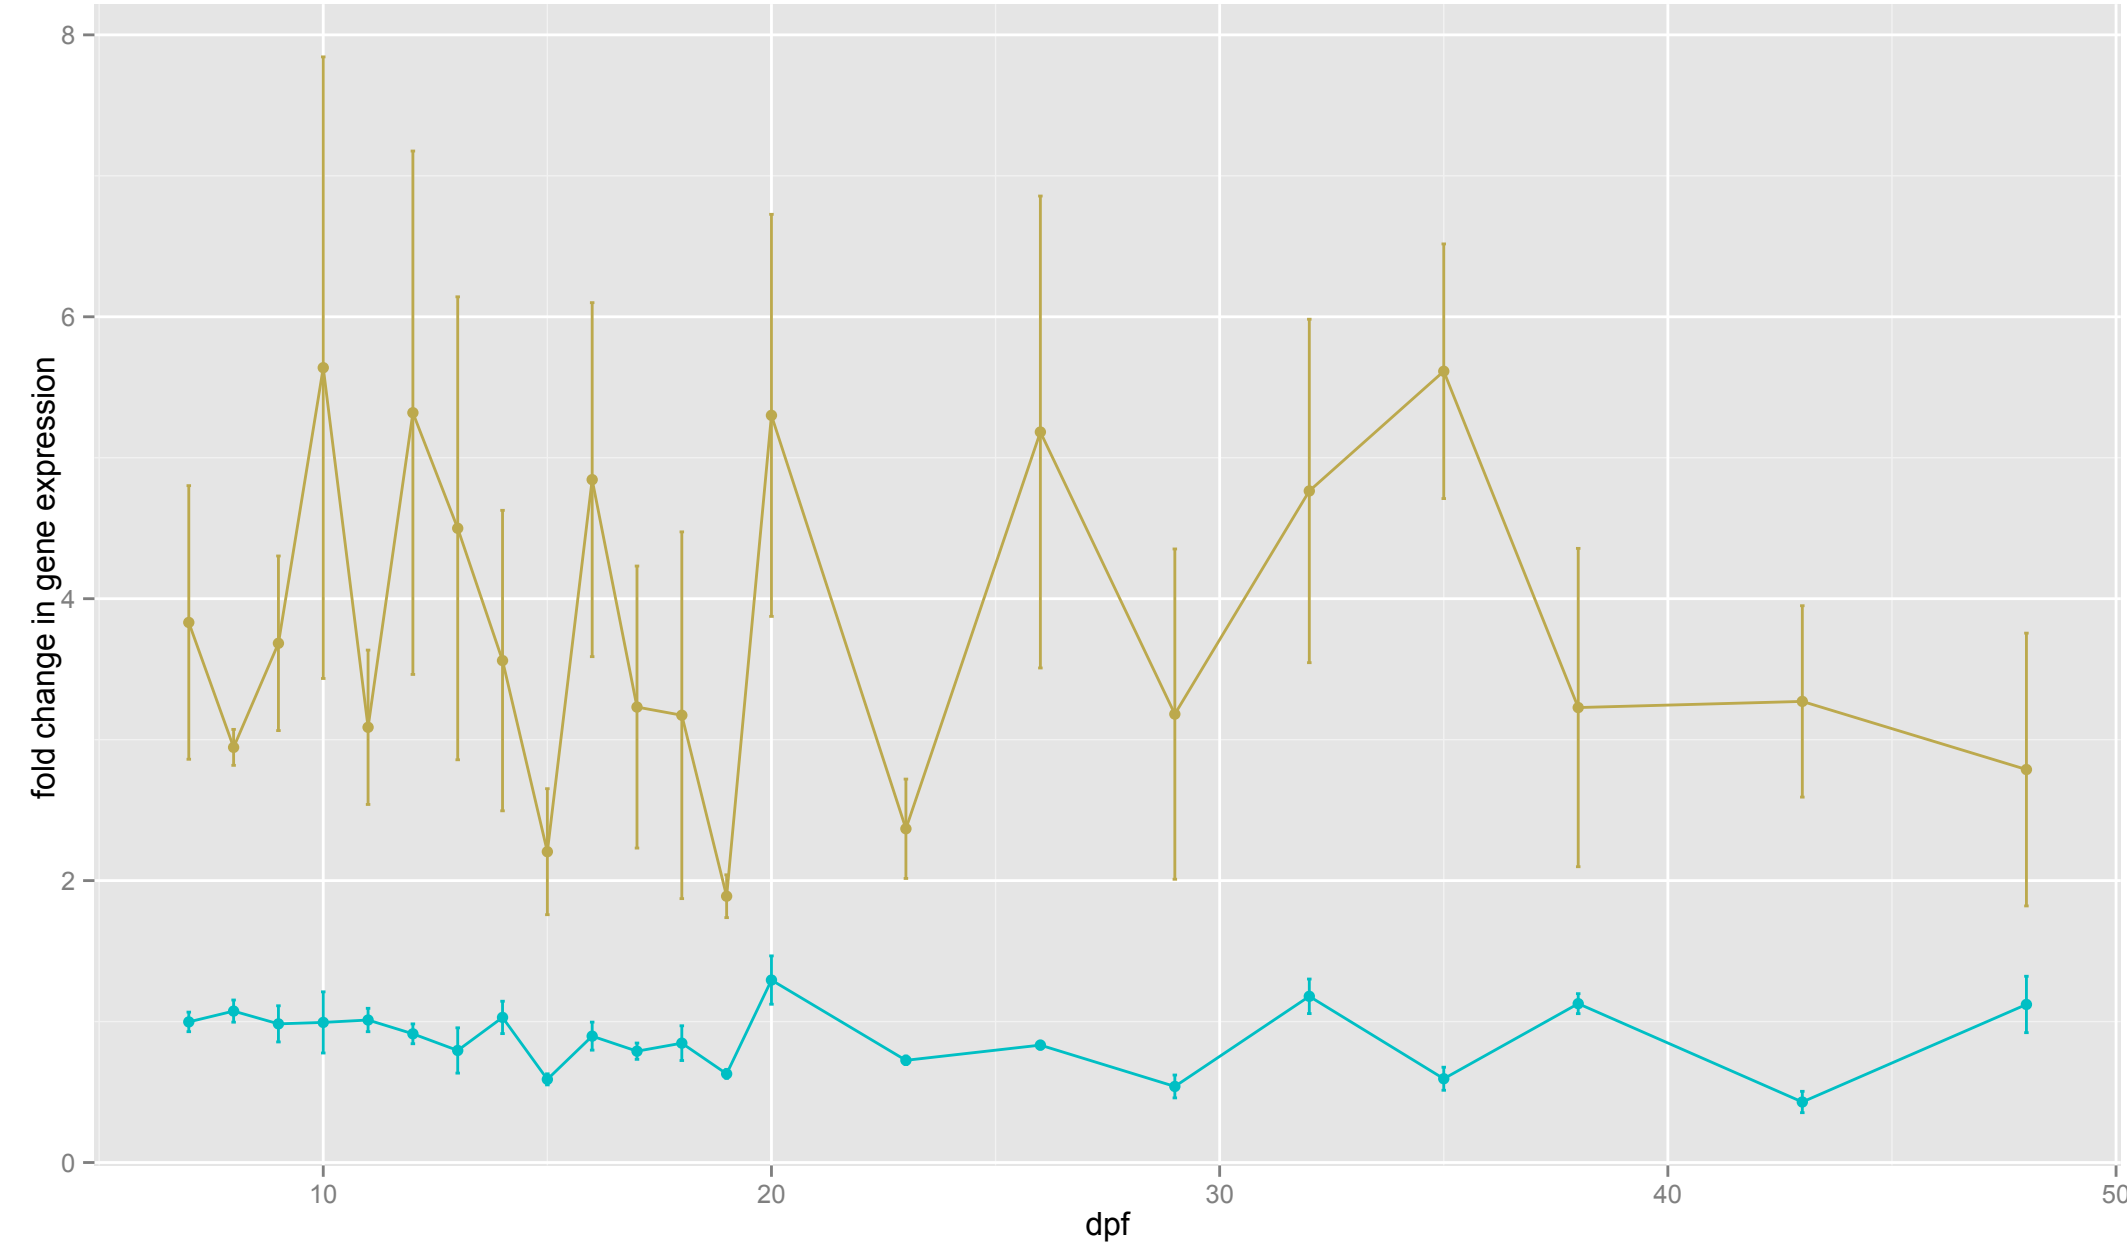

*dmrt1*

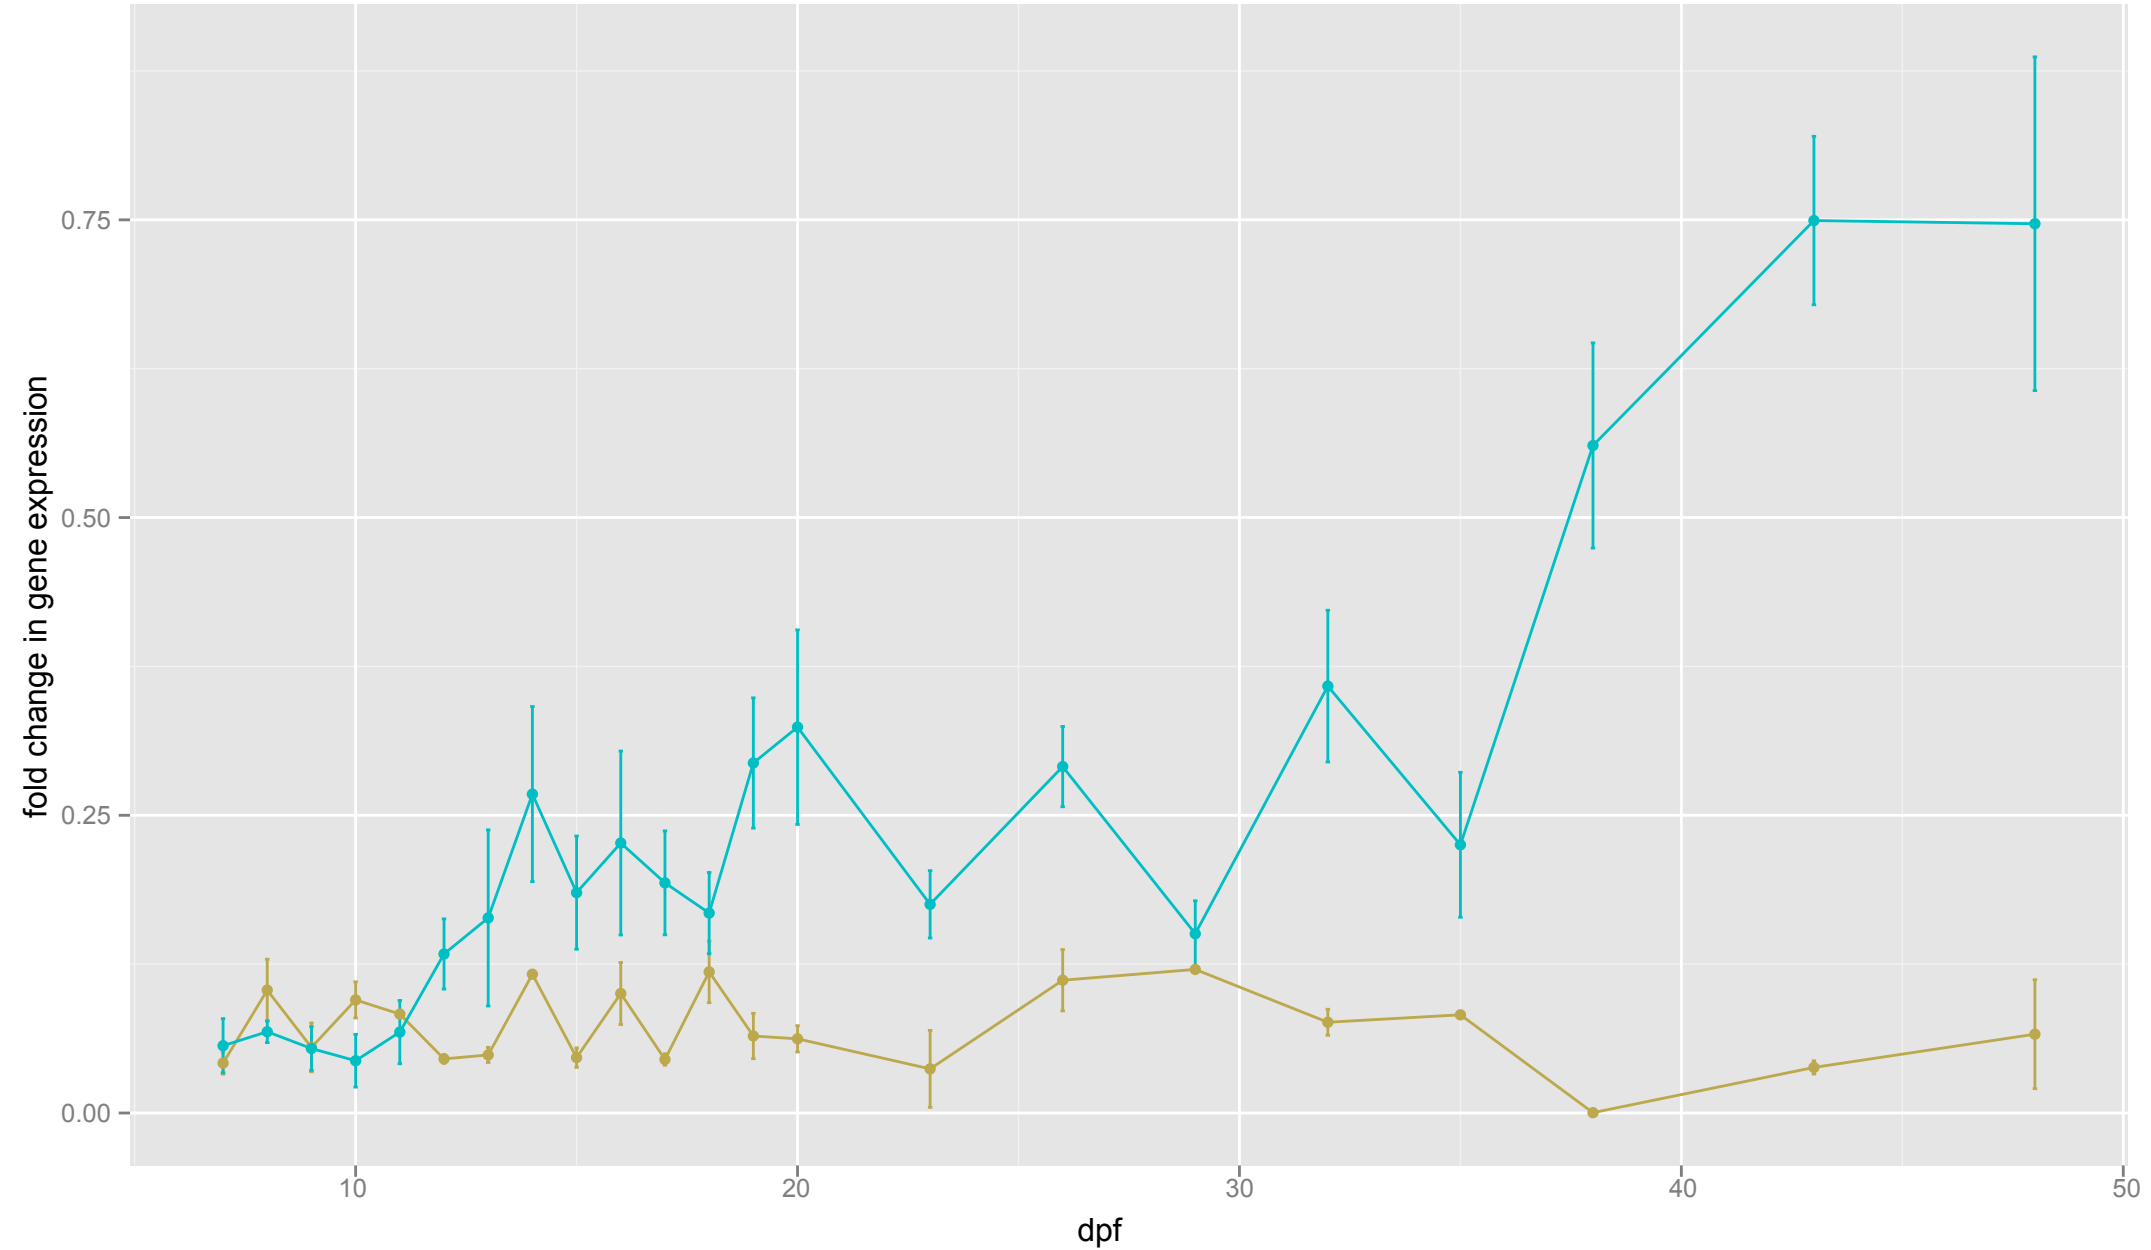

*figla*

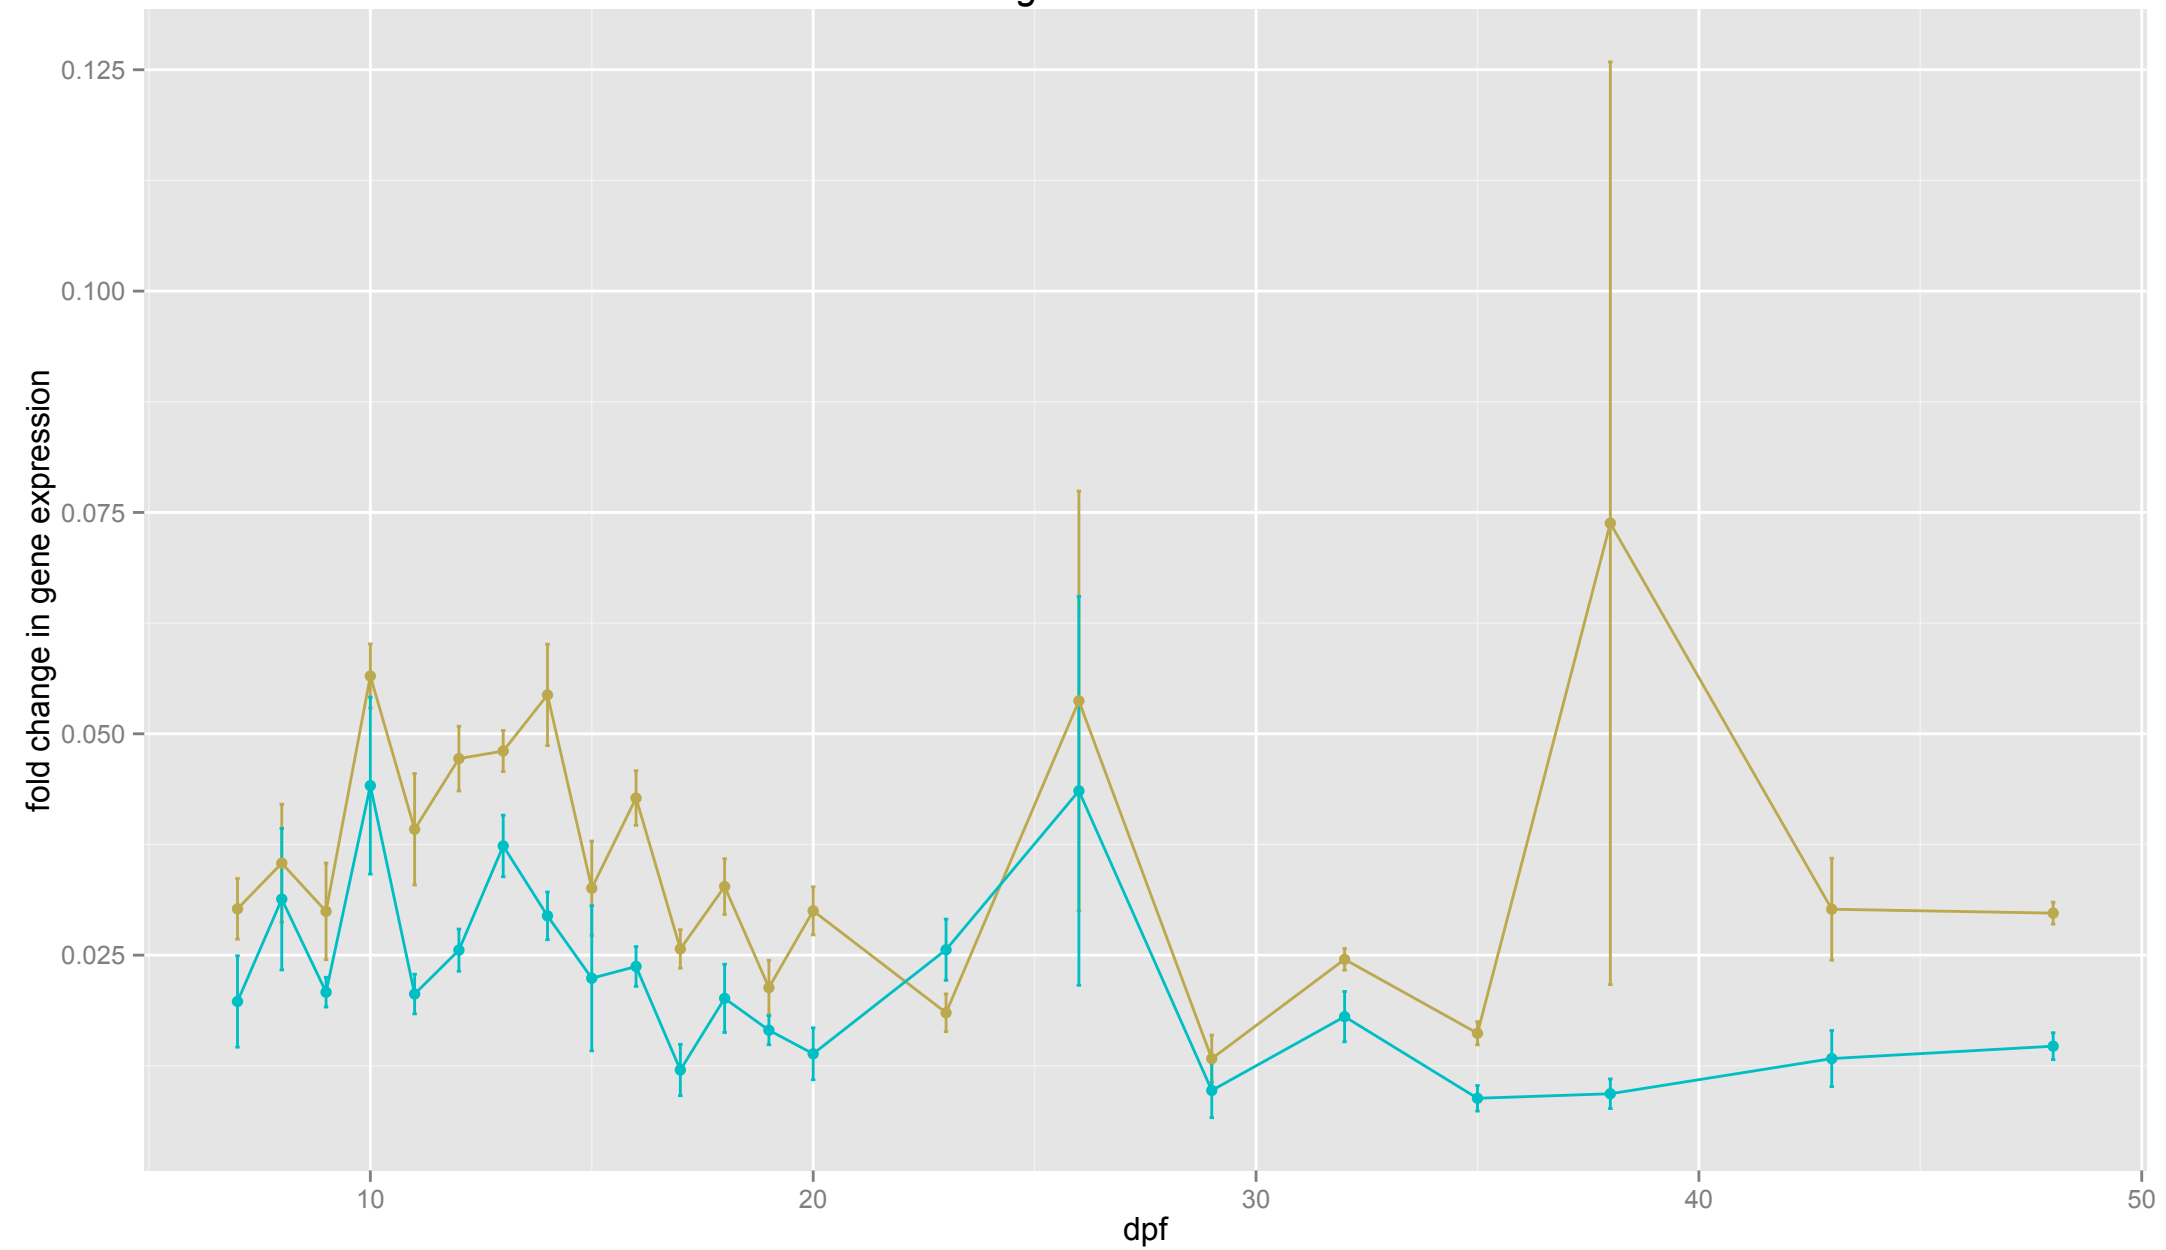



*foxl2A/foxl2*

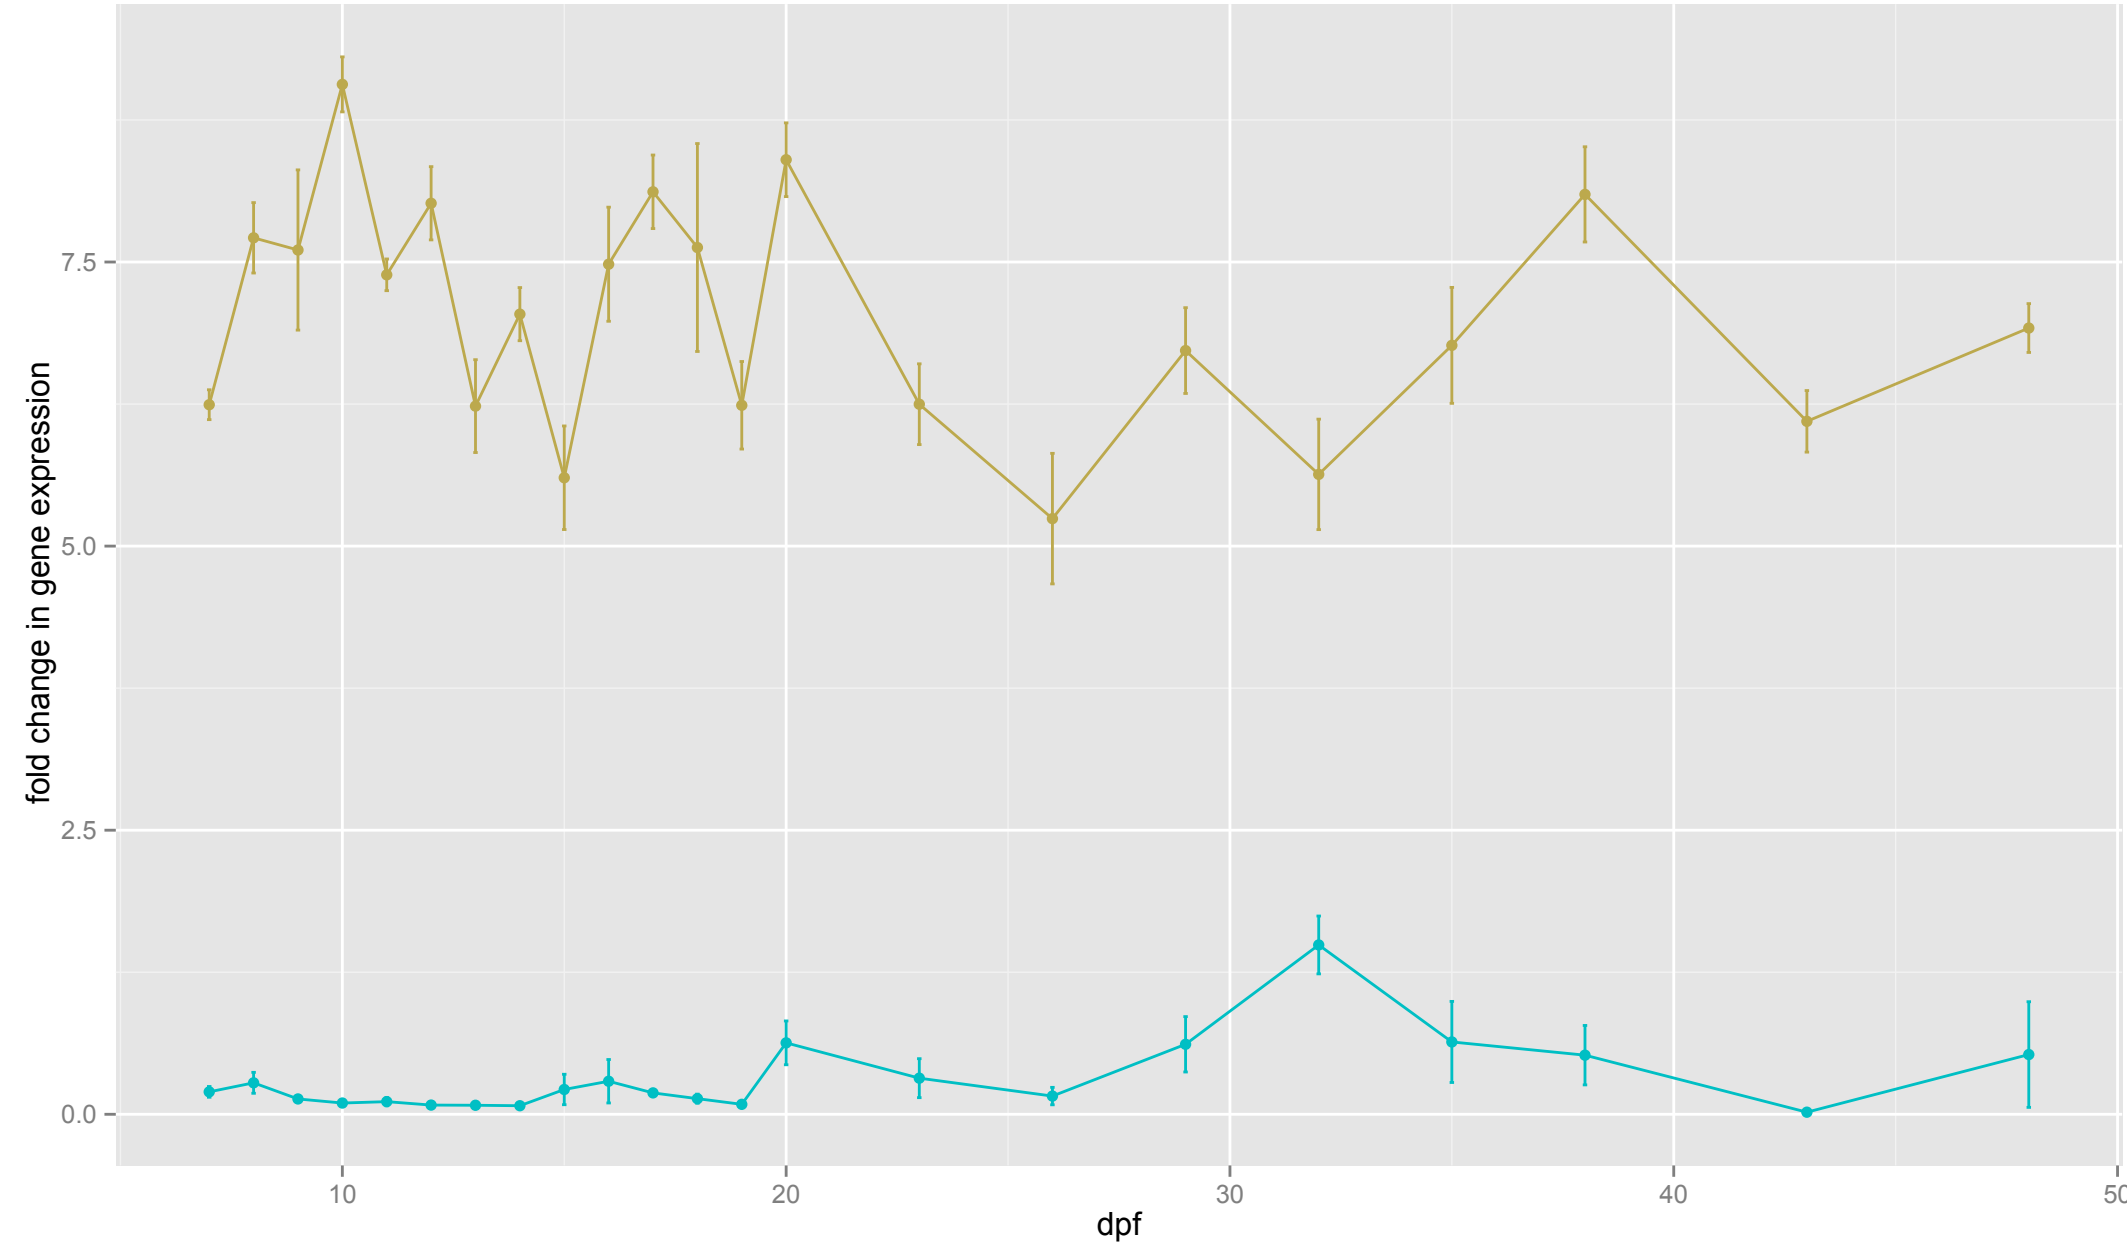

*foxl2B*

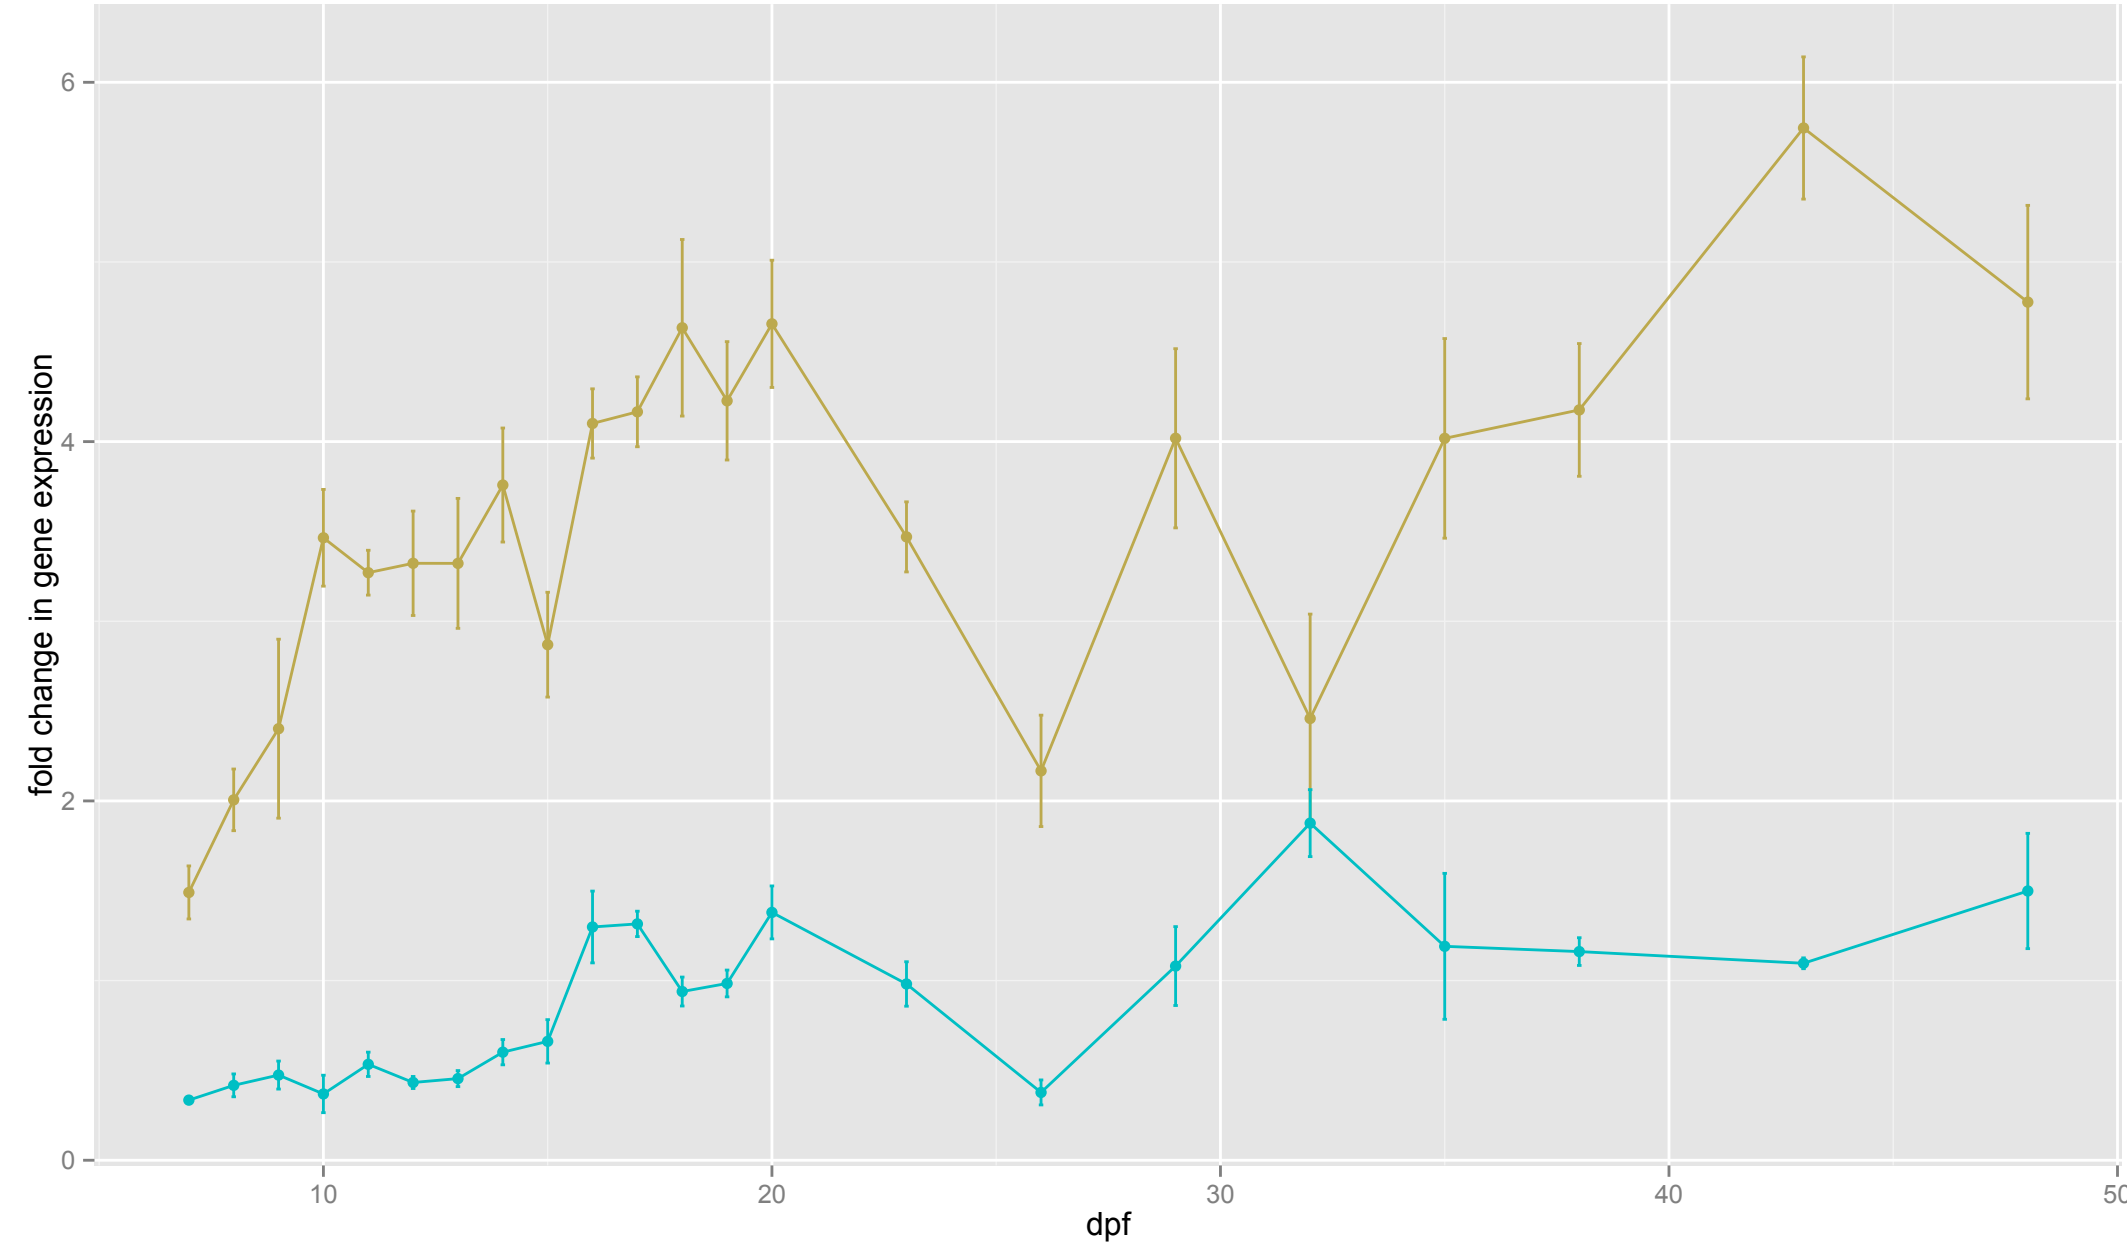

*gata4*

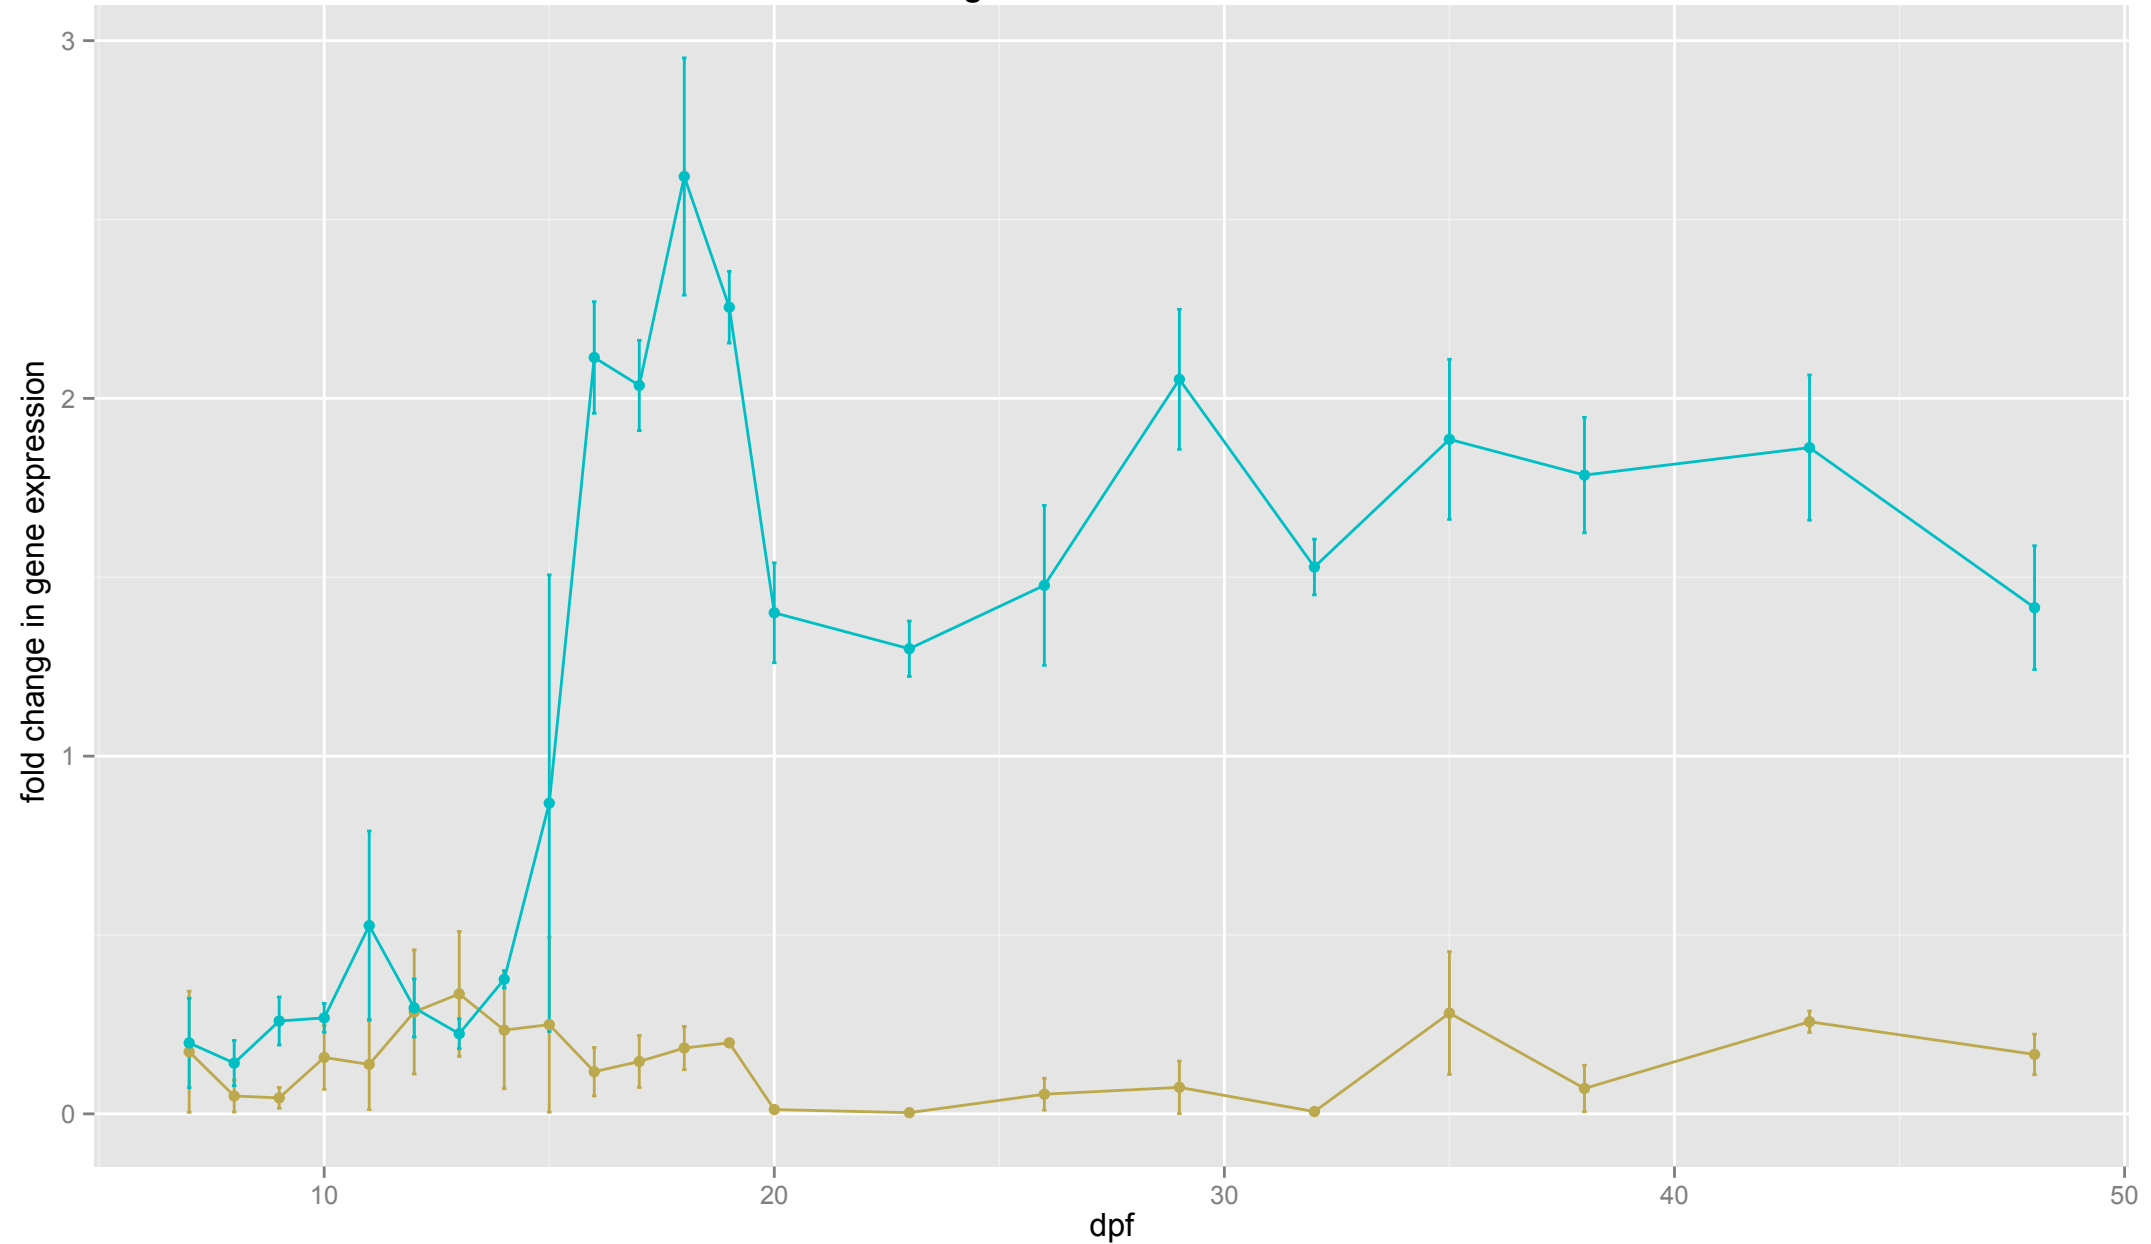

*gsdf*

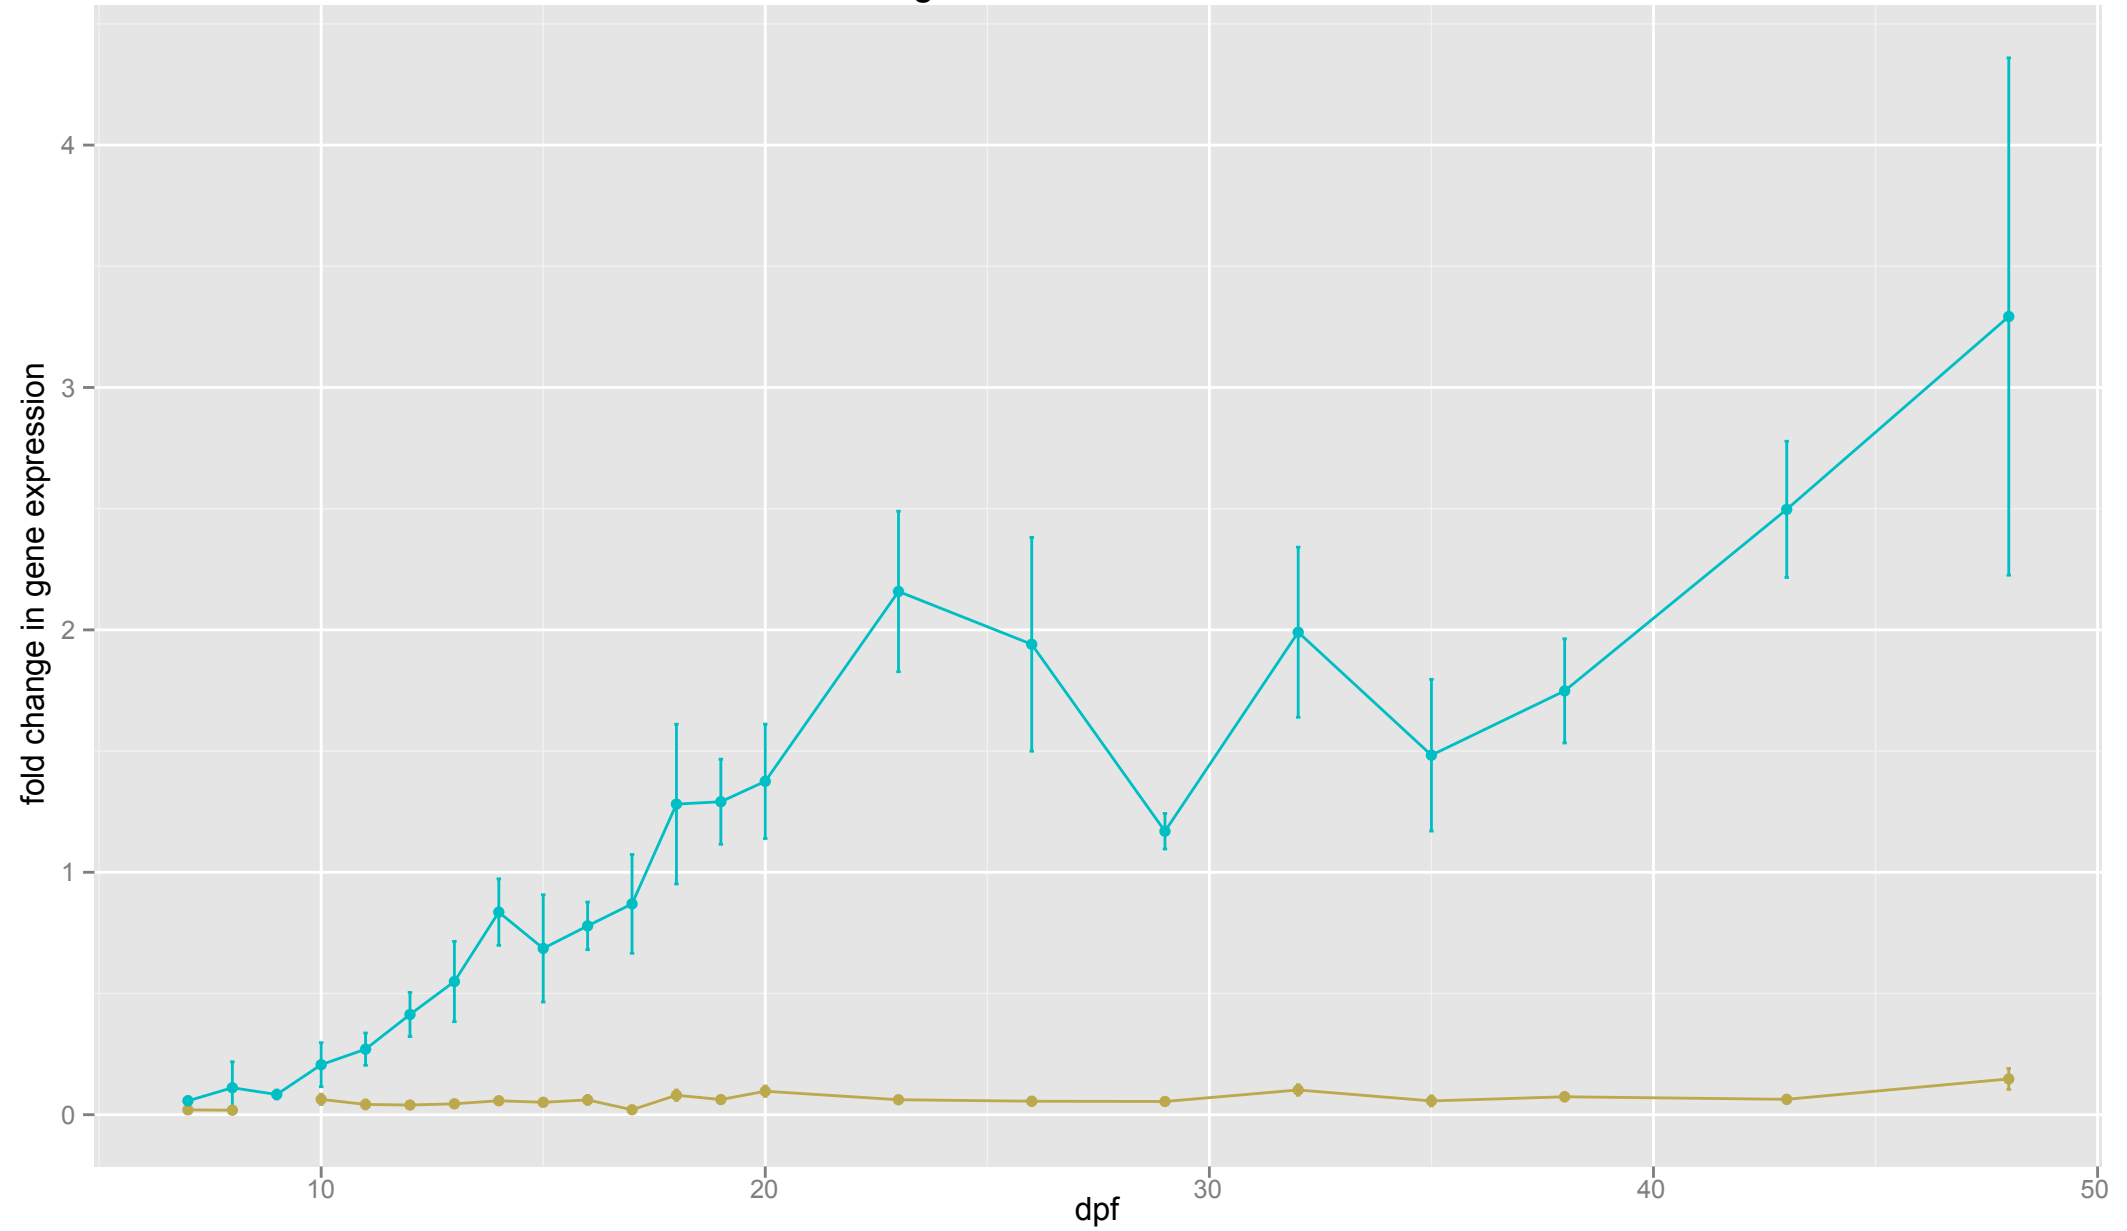

*nanos1A*

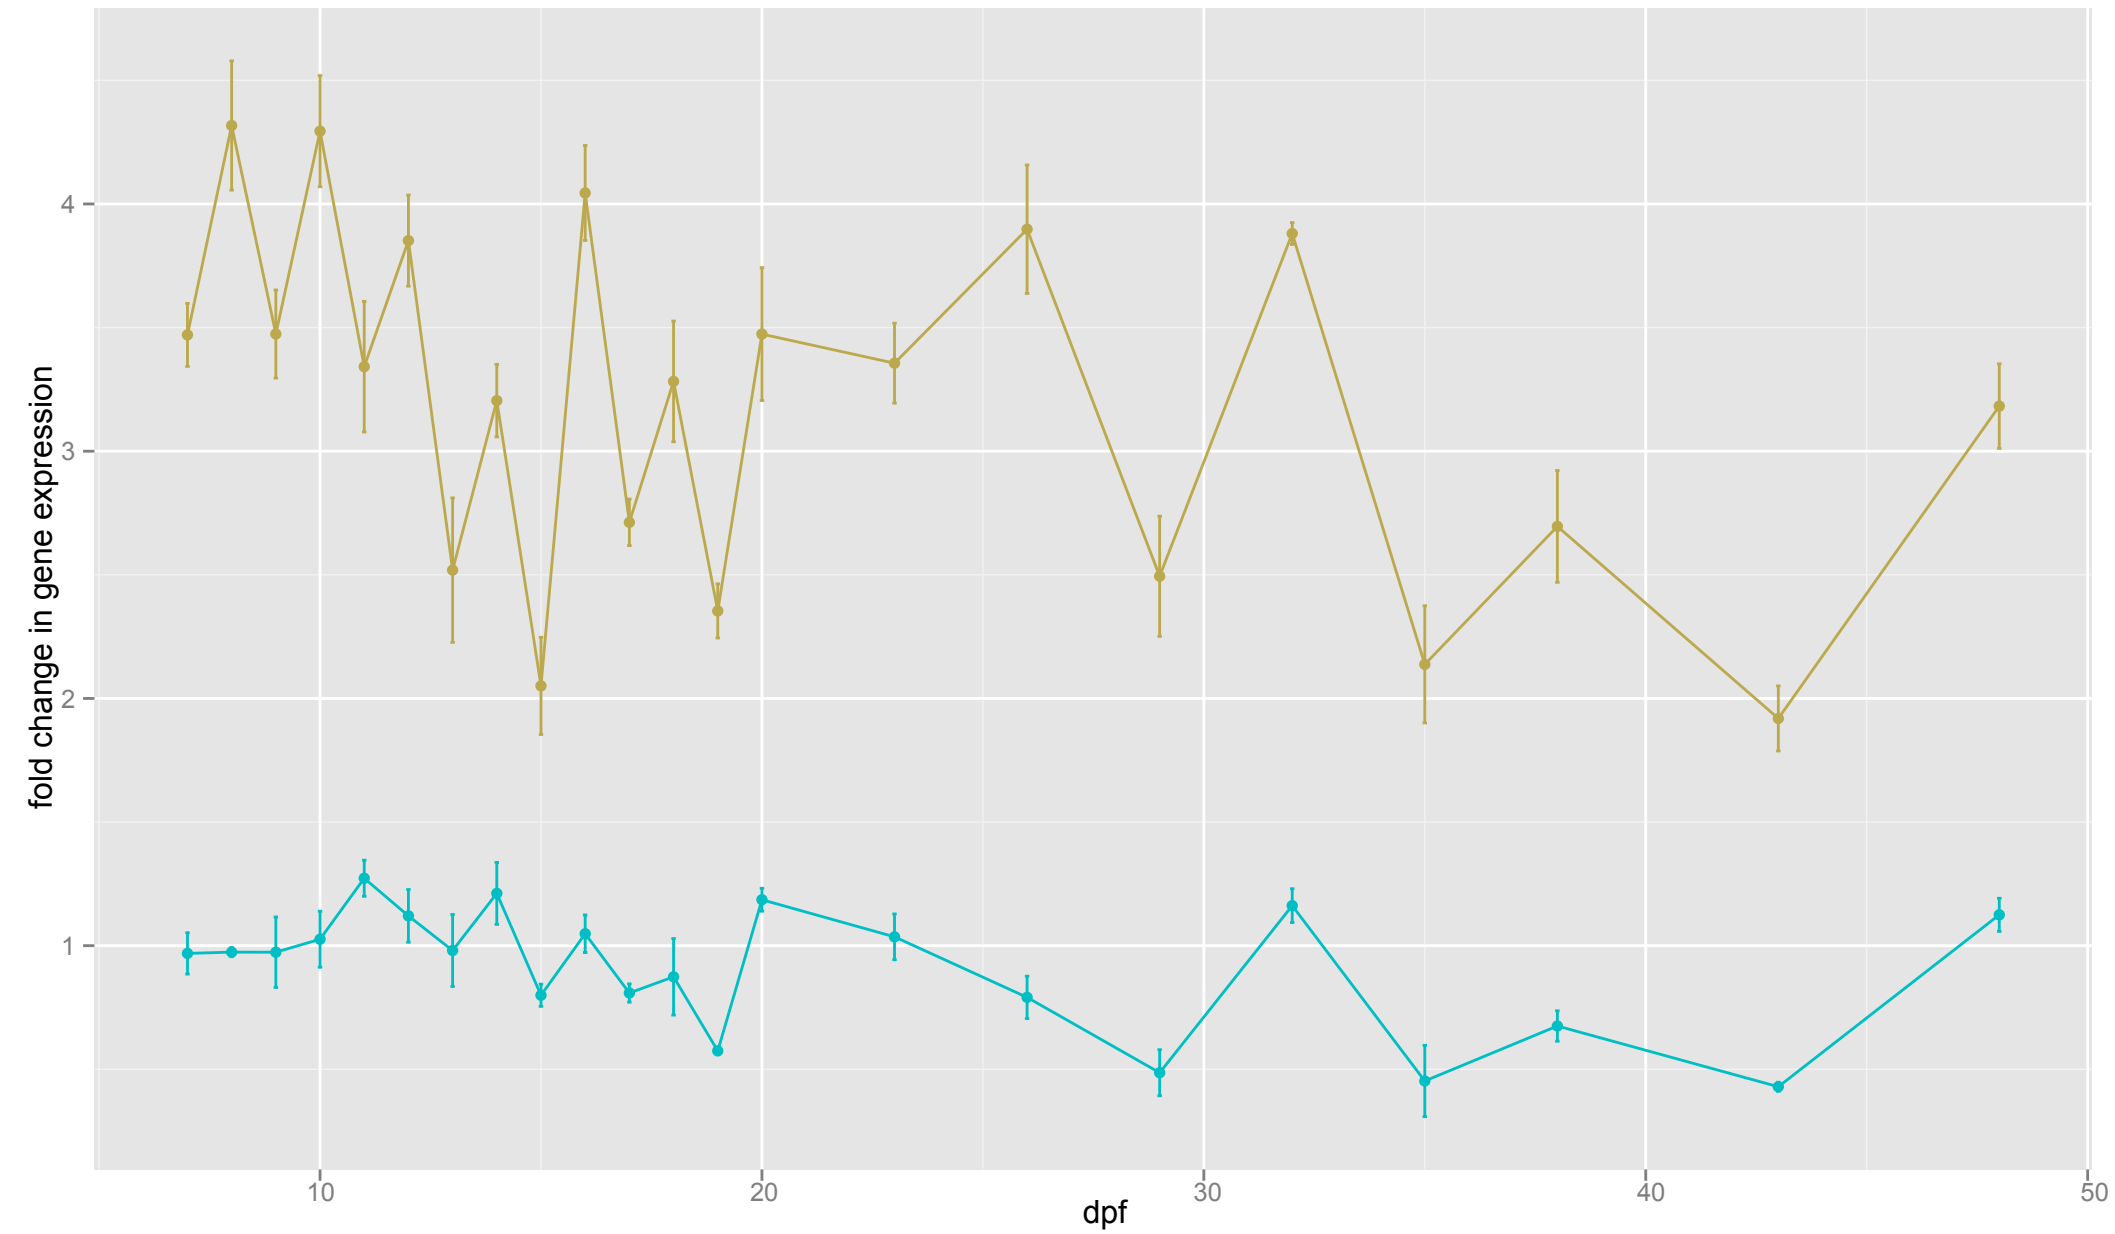

*nanos1B*

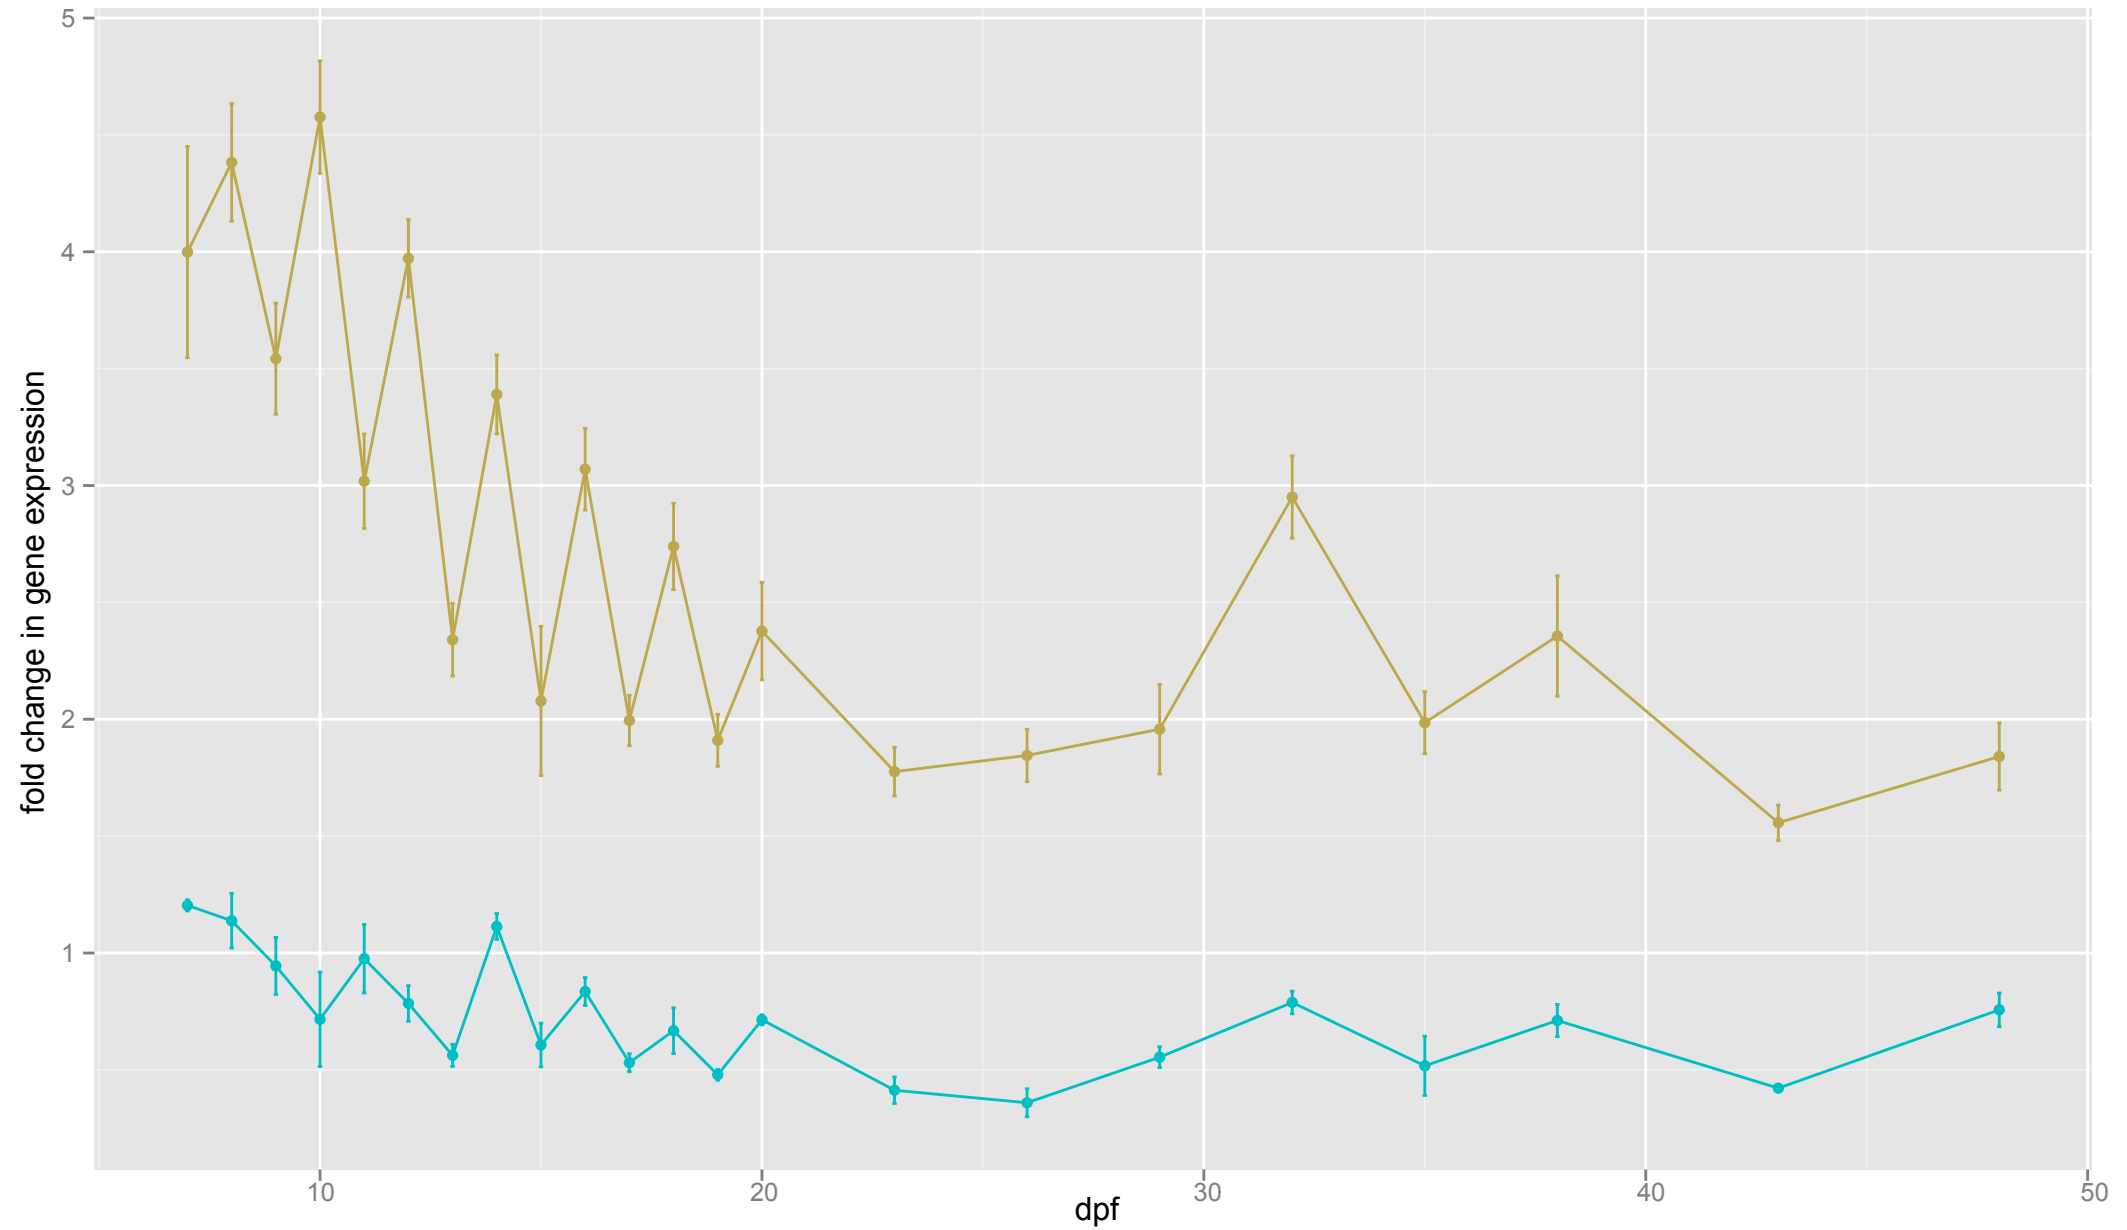

*nr5a2*

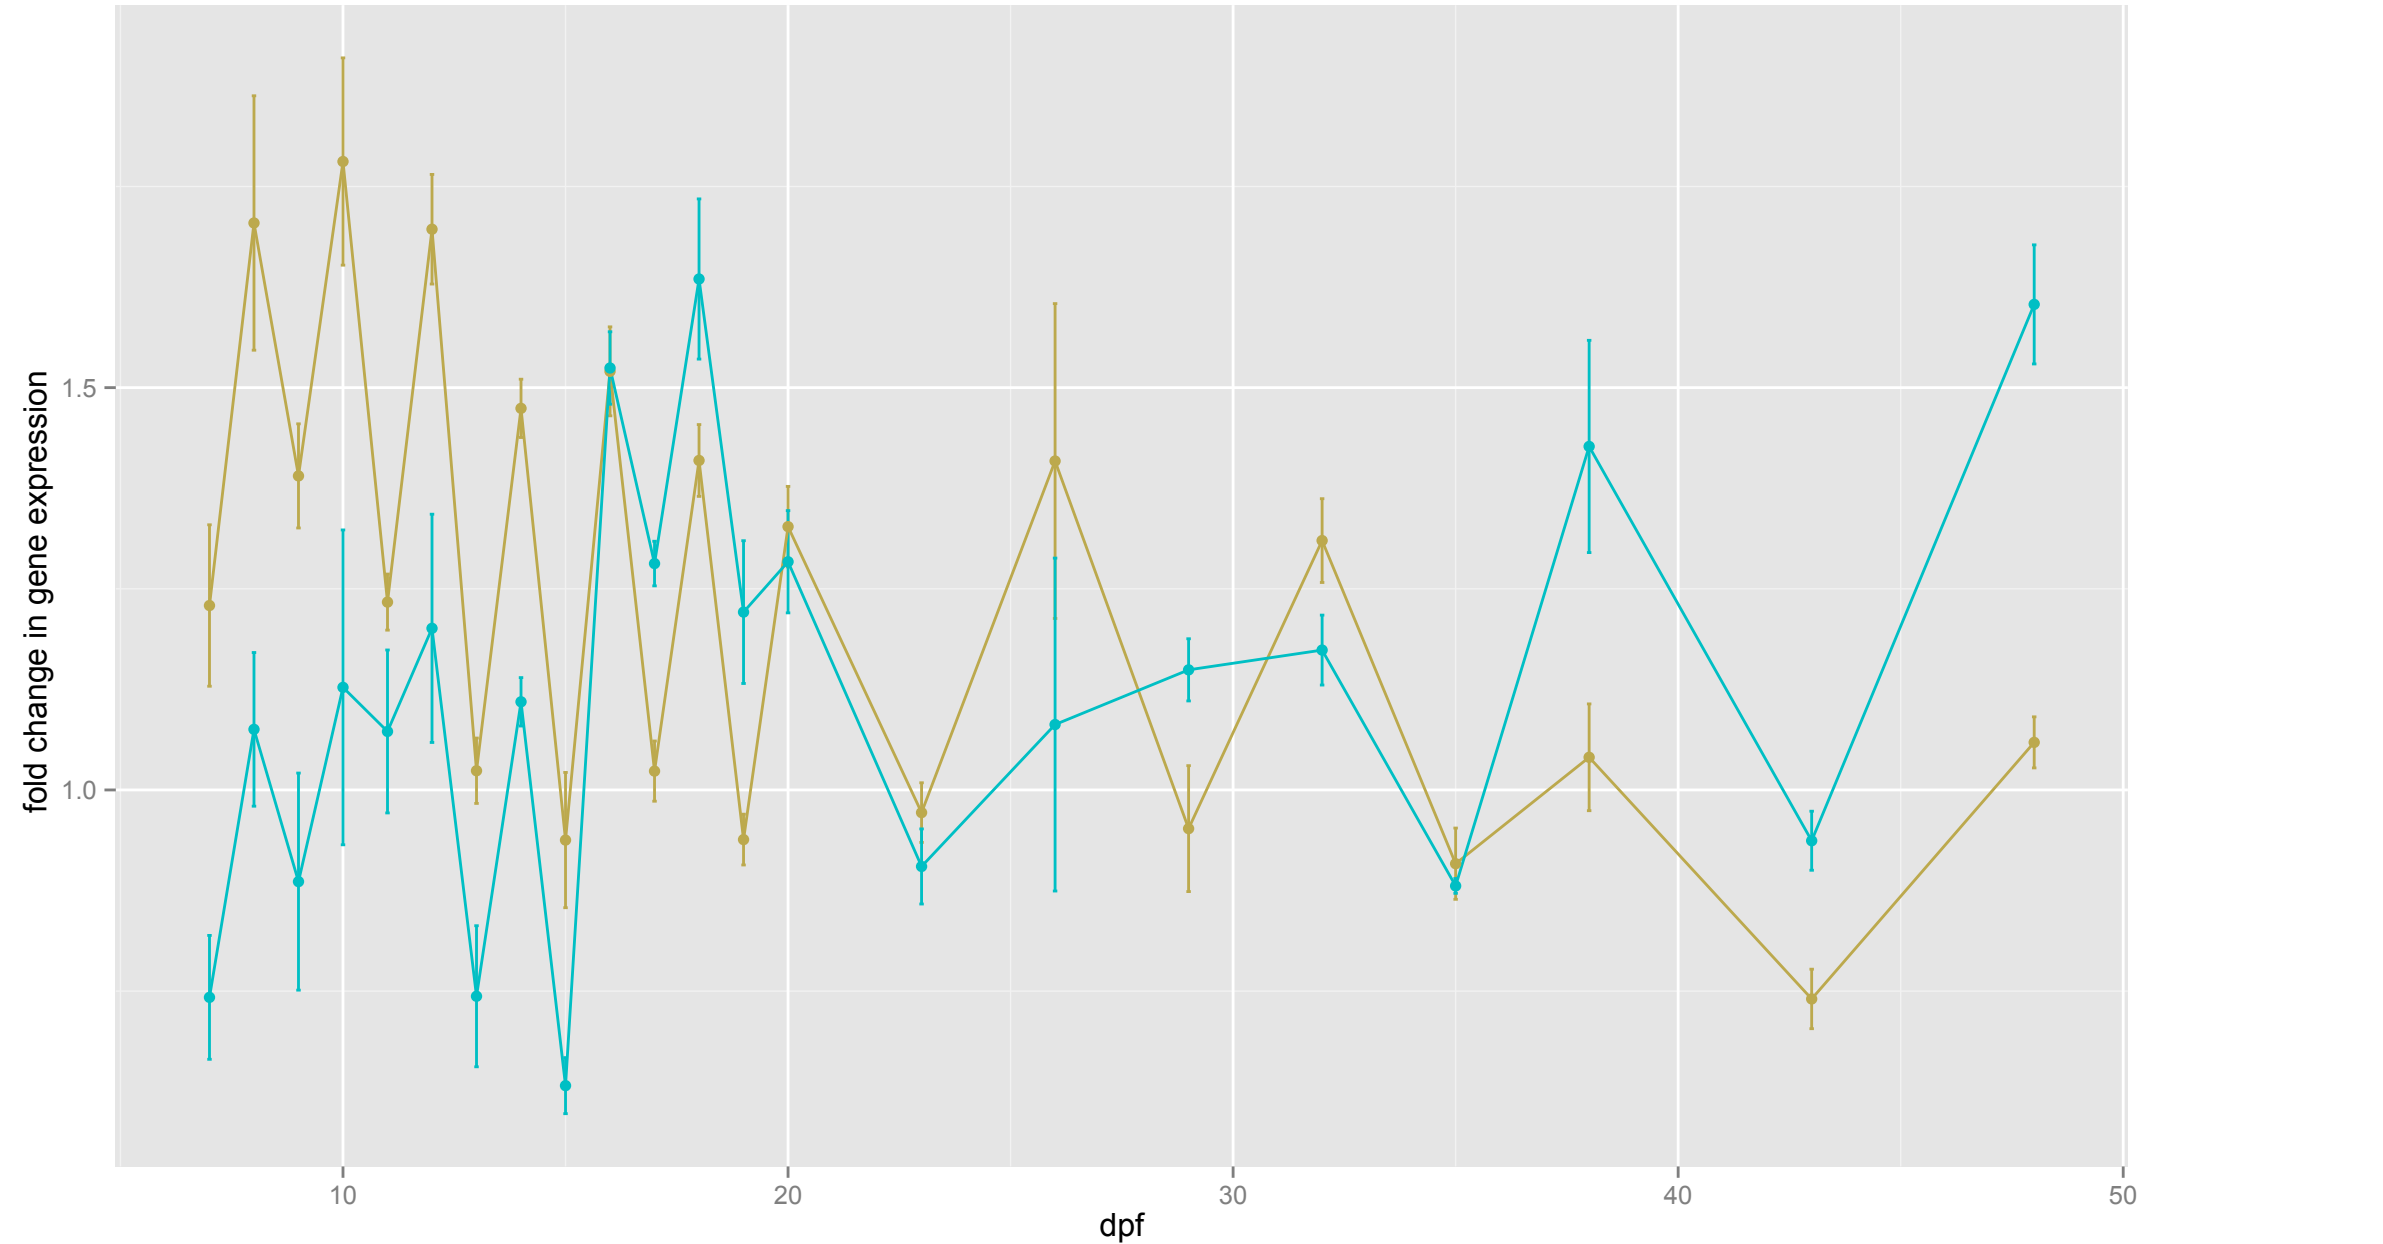

*nr5a5*

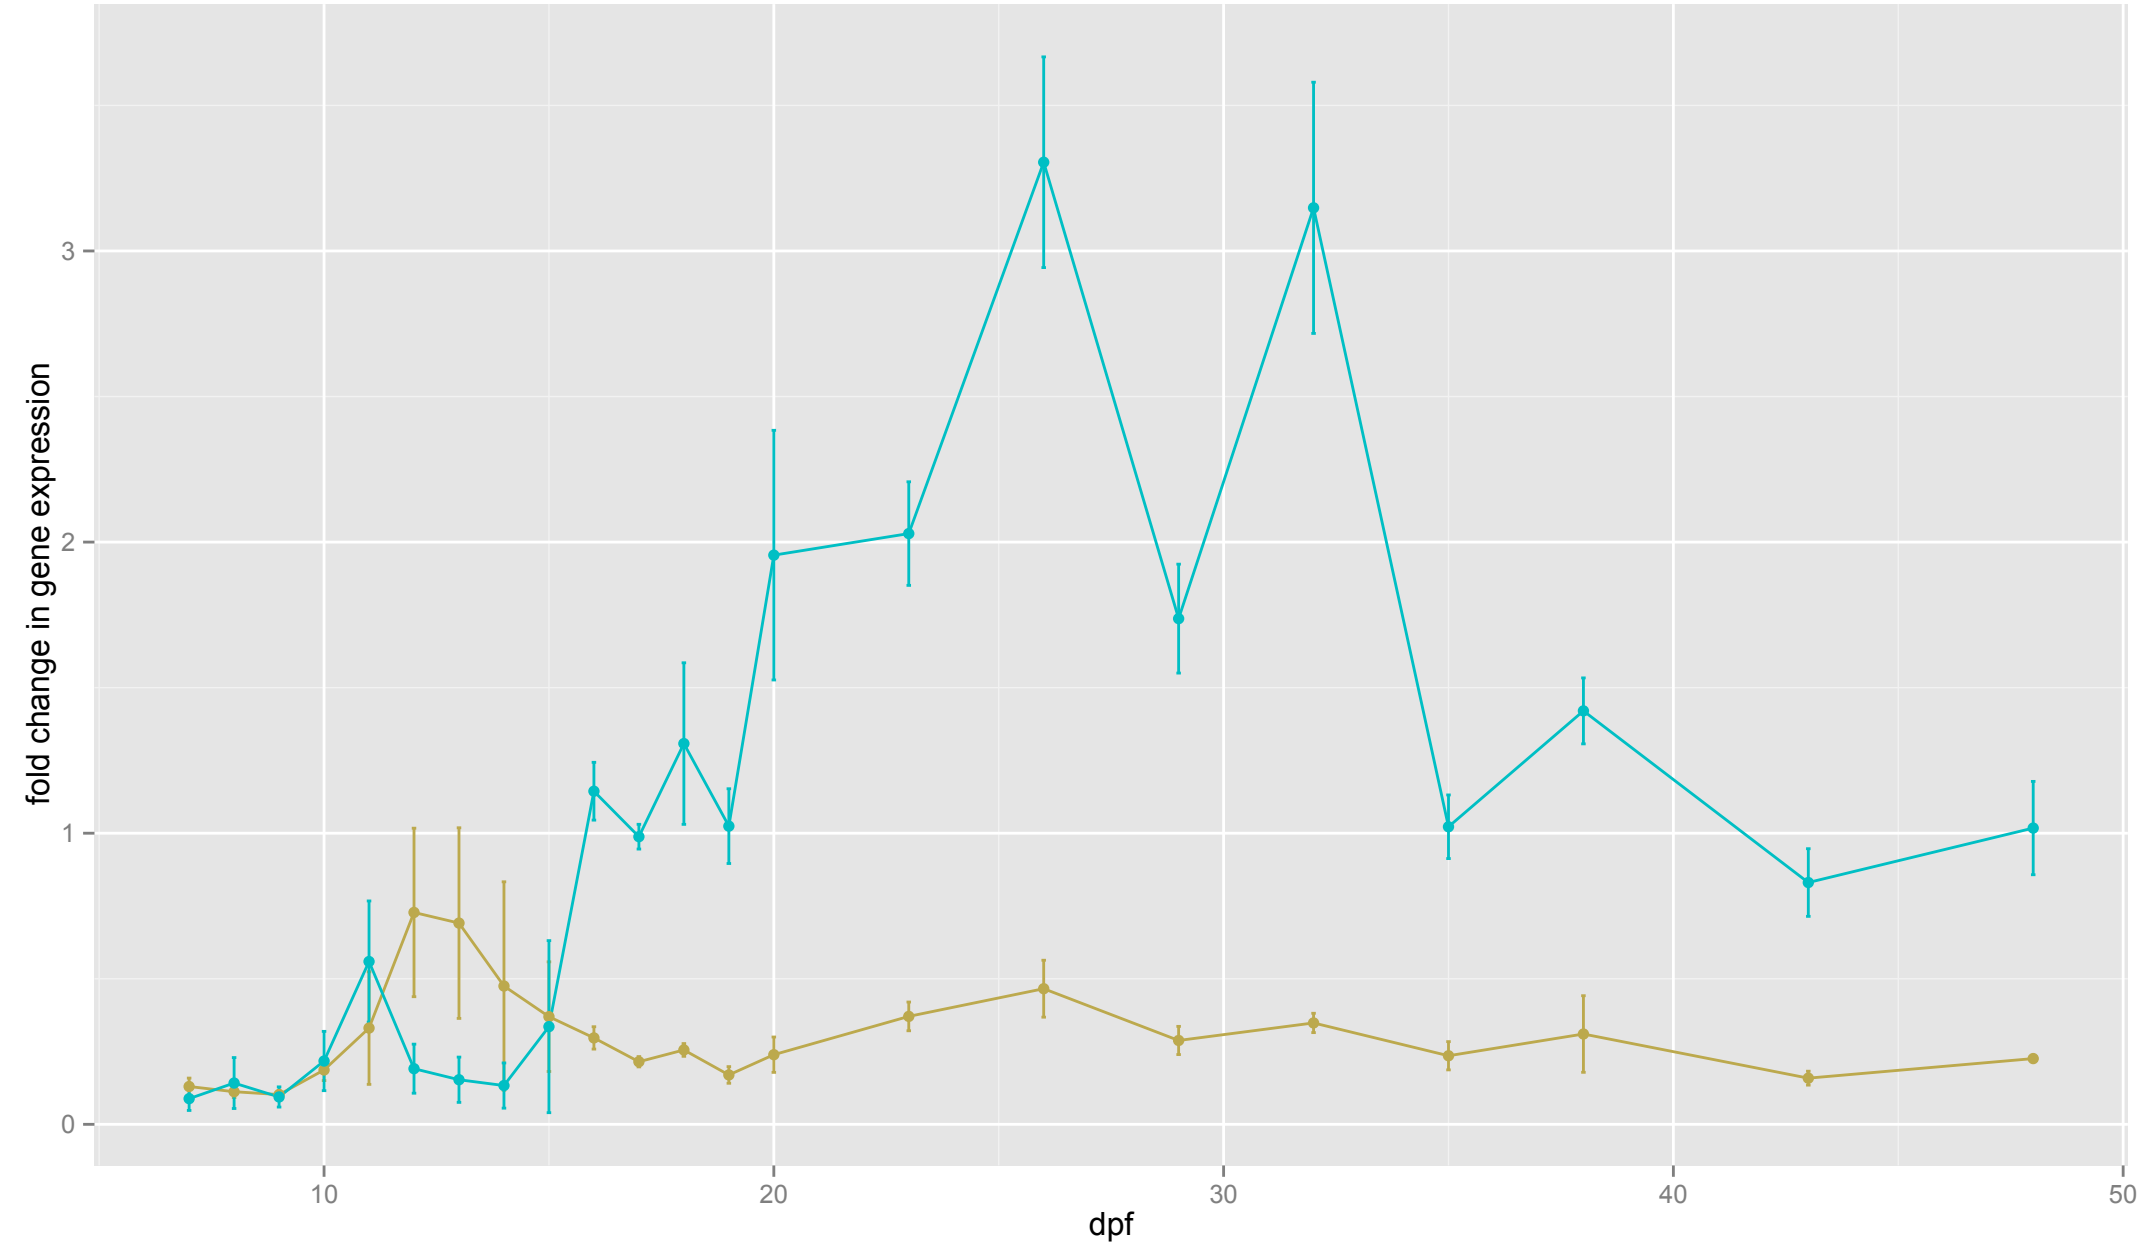



*rspo1*

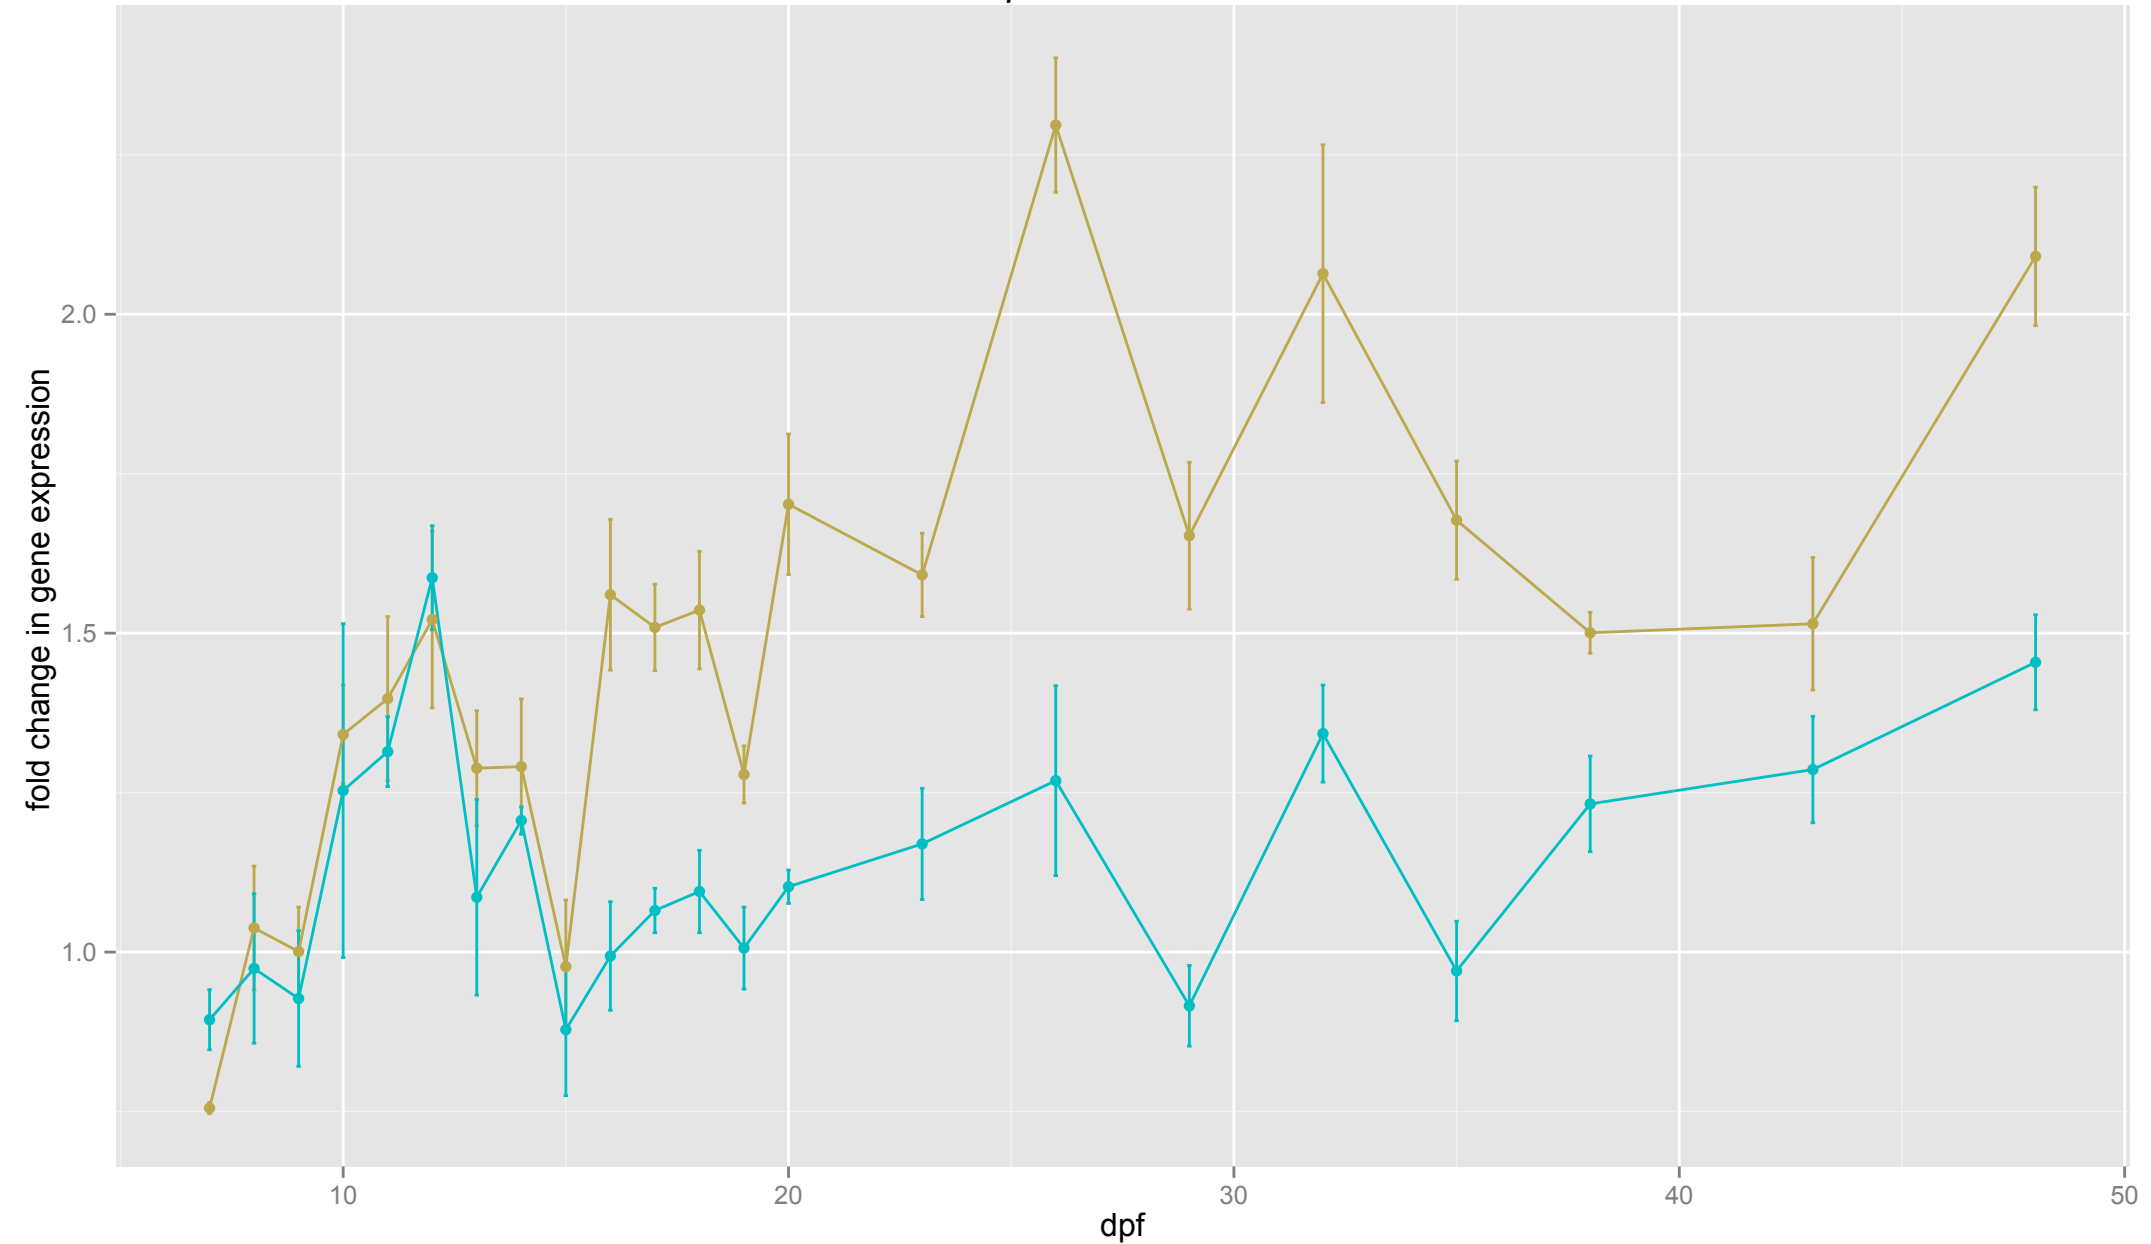

*sf-1*

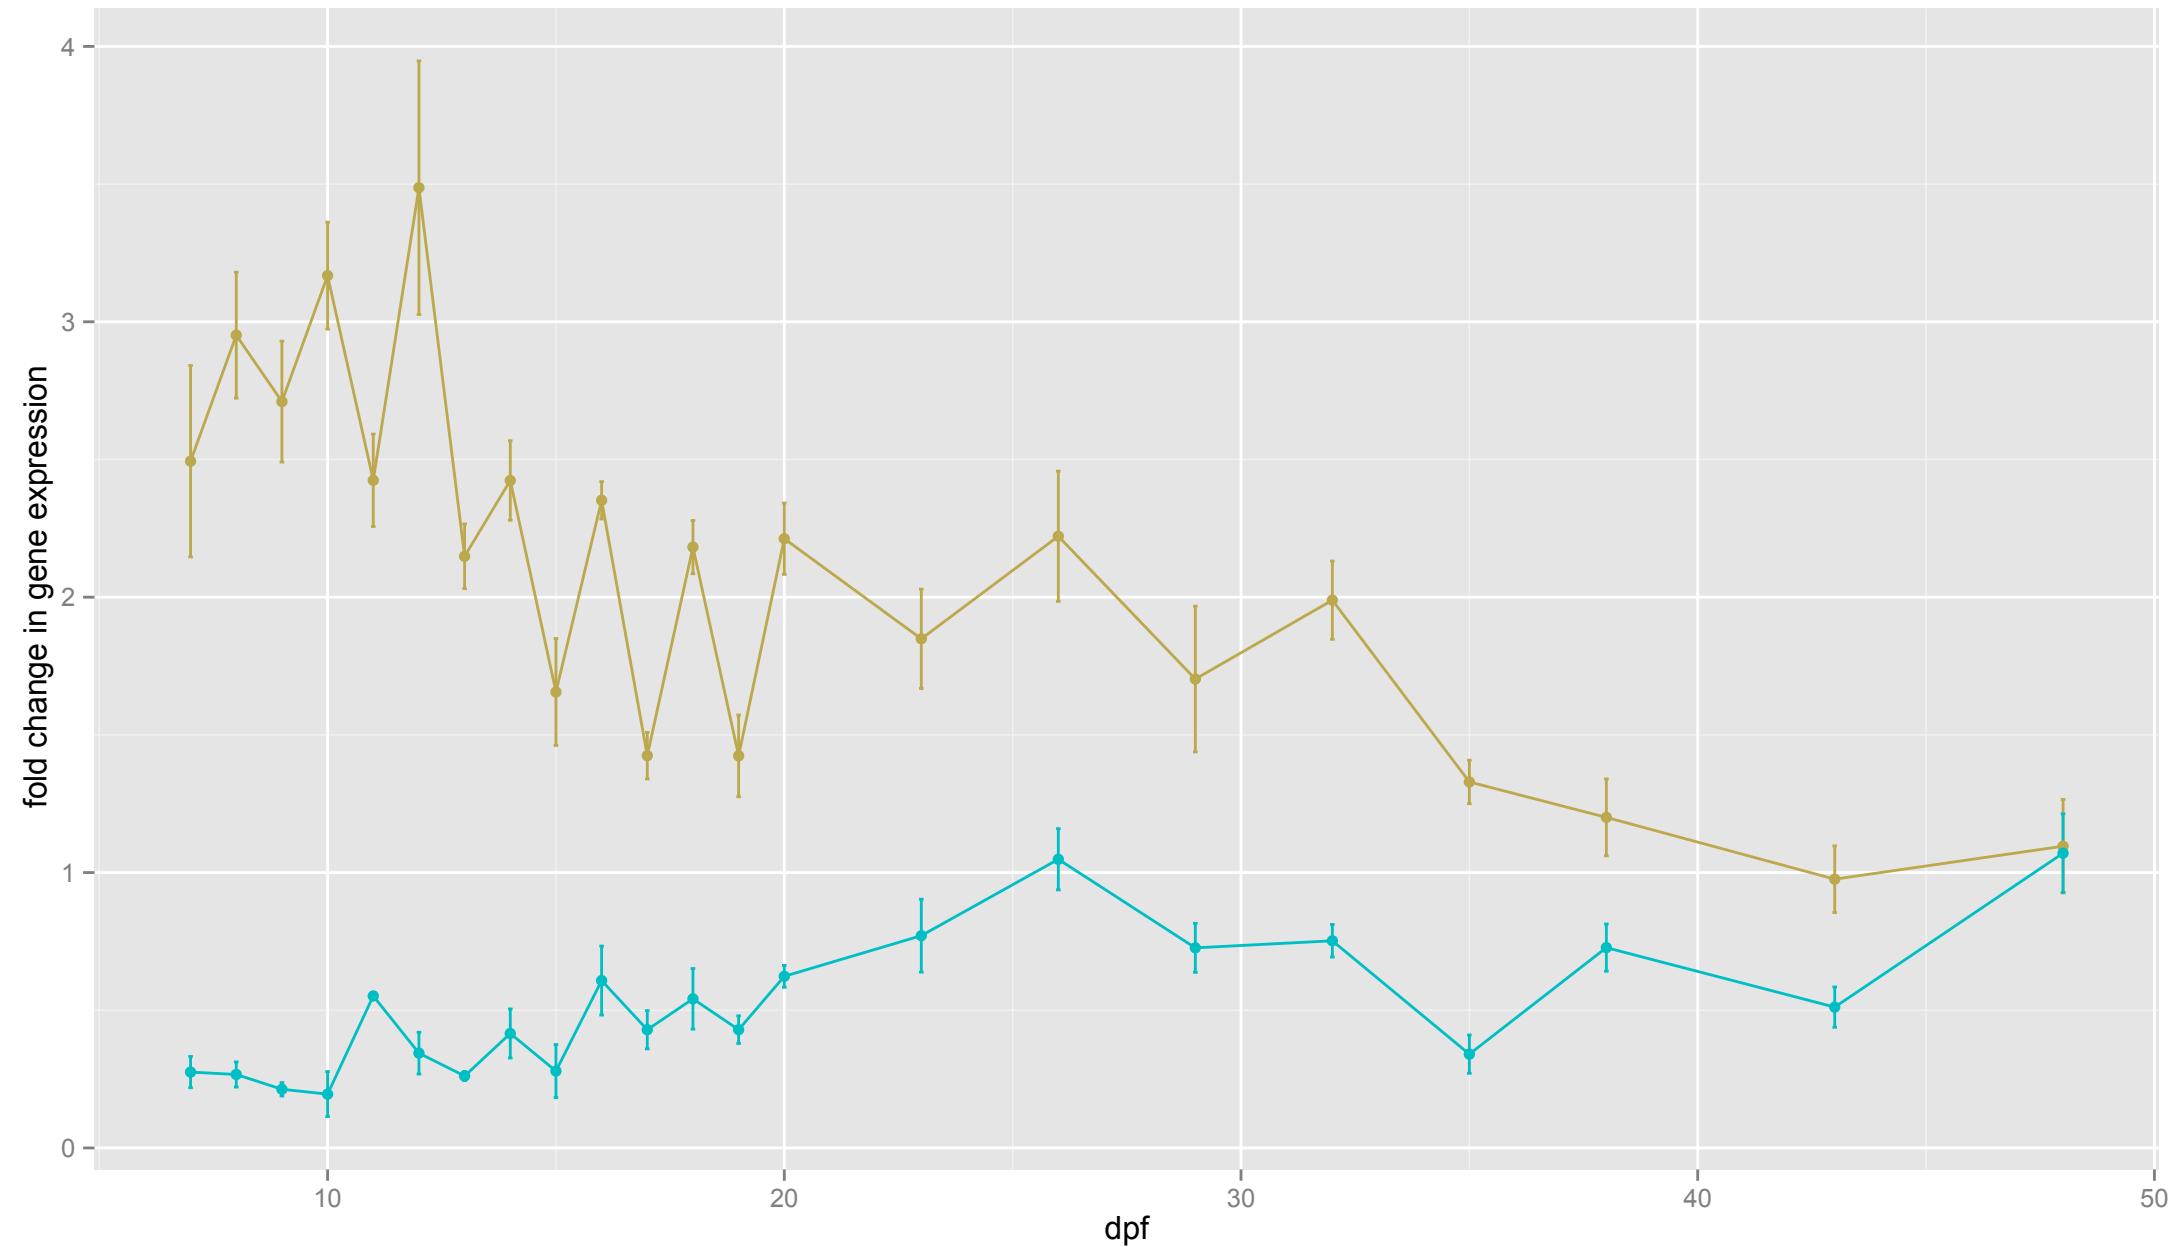

*sox9A*

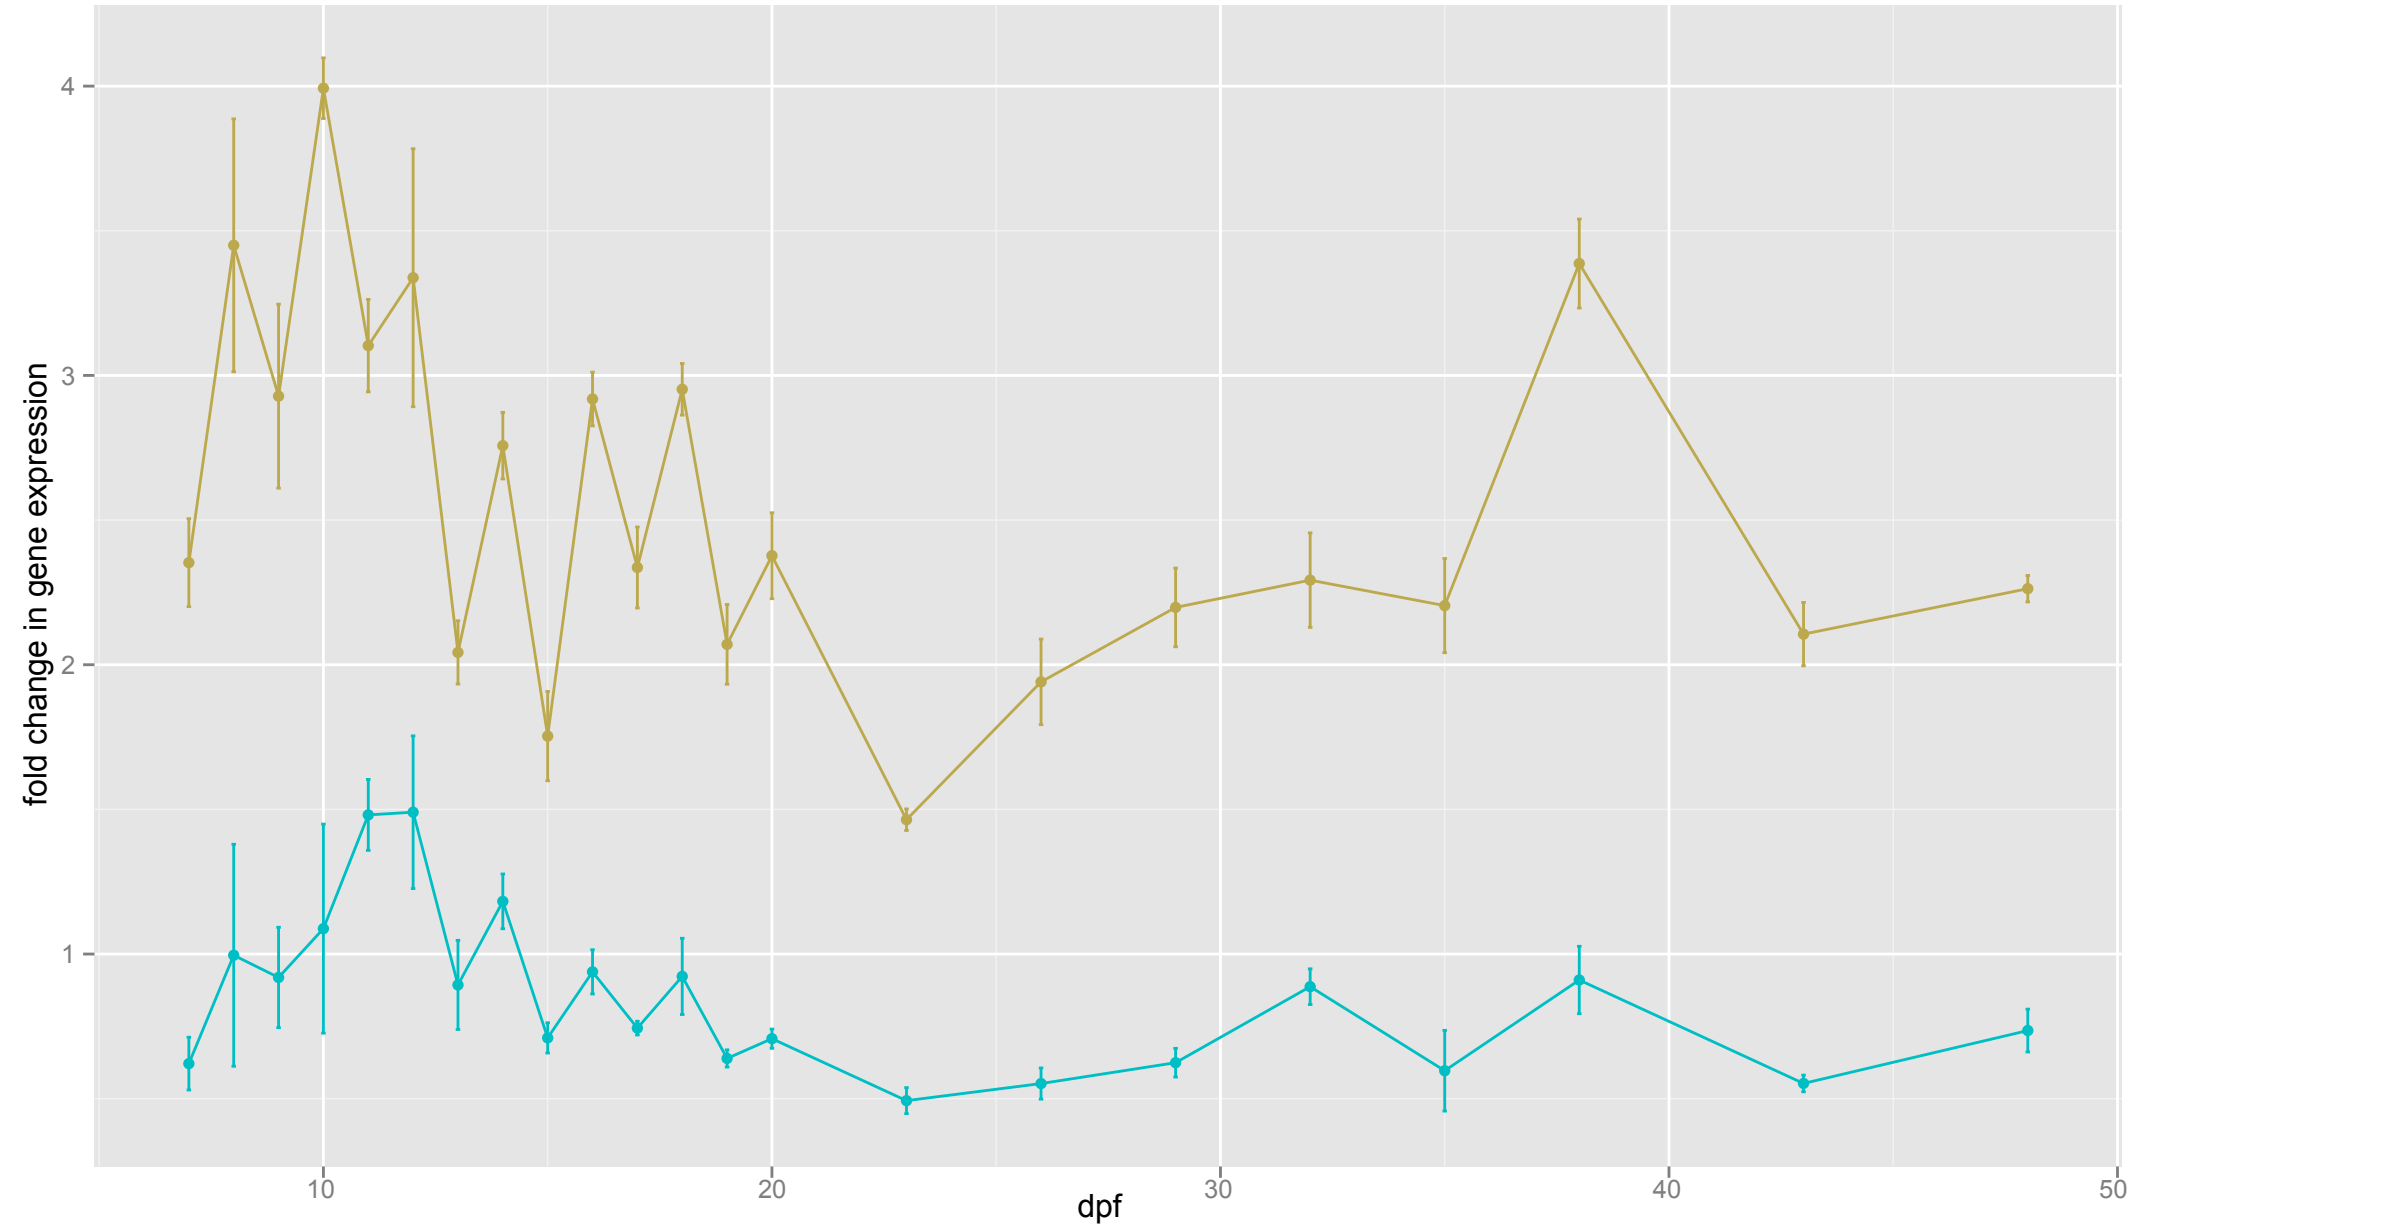

*sox9B*

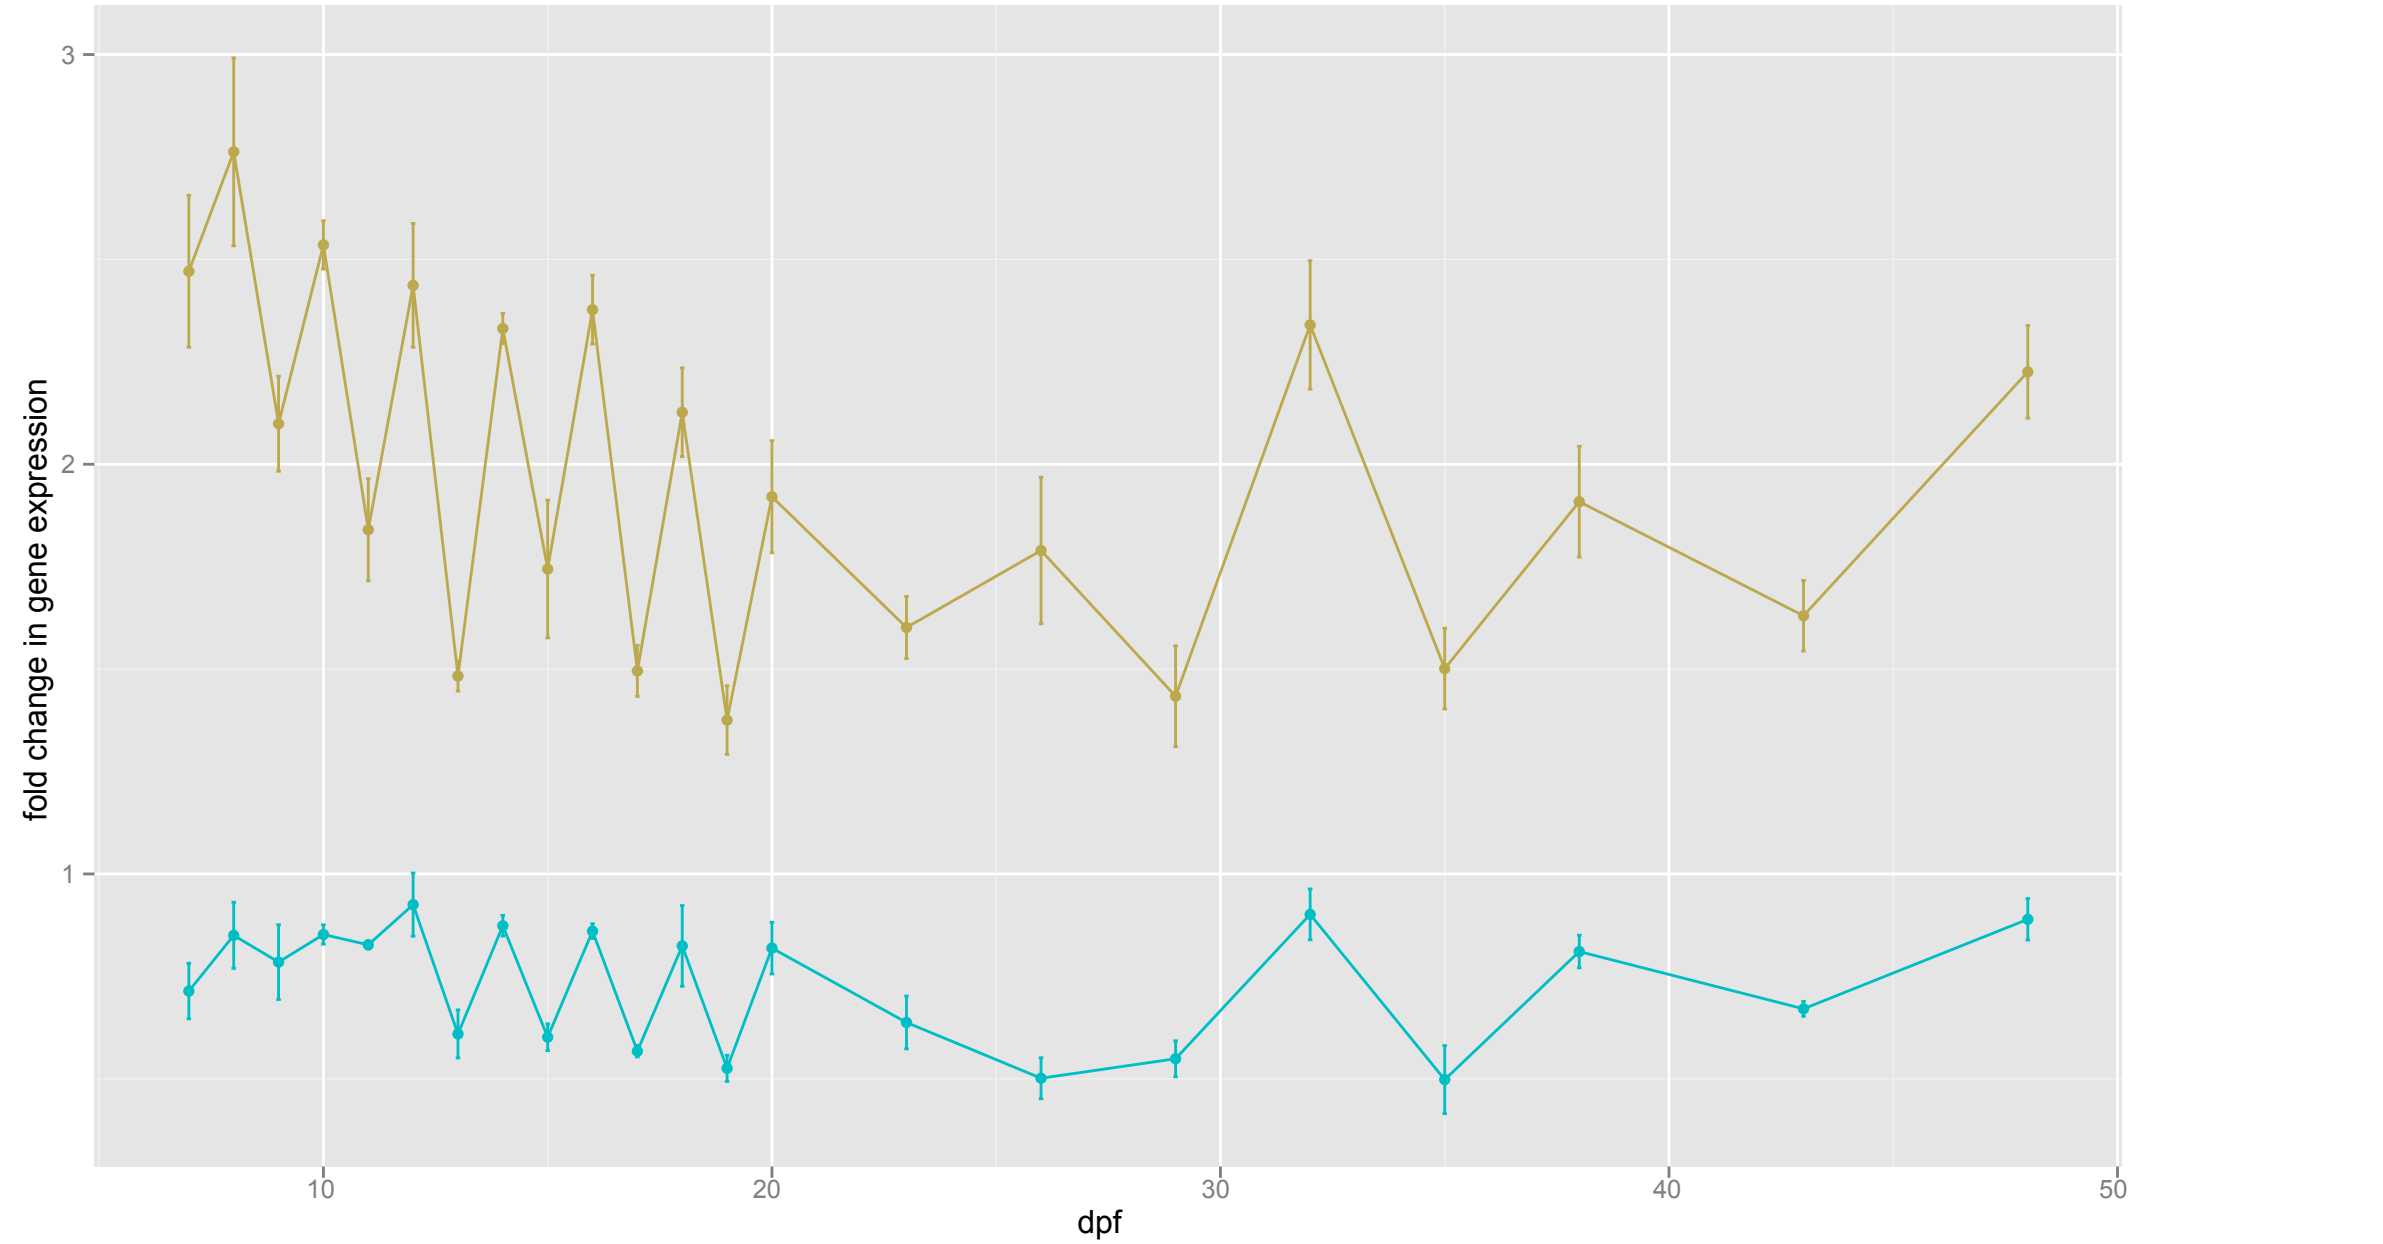

*wnt4A*

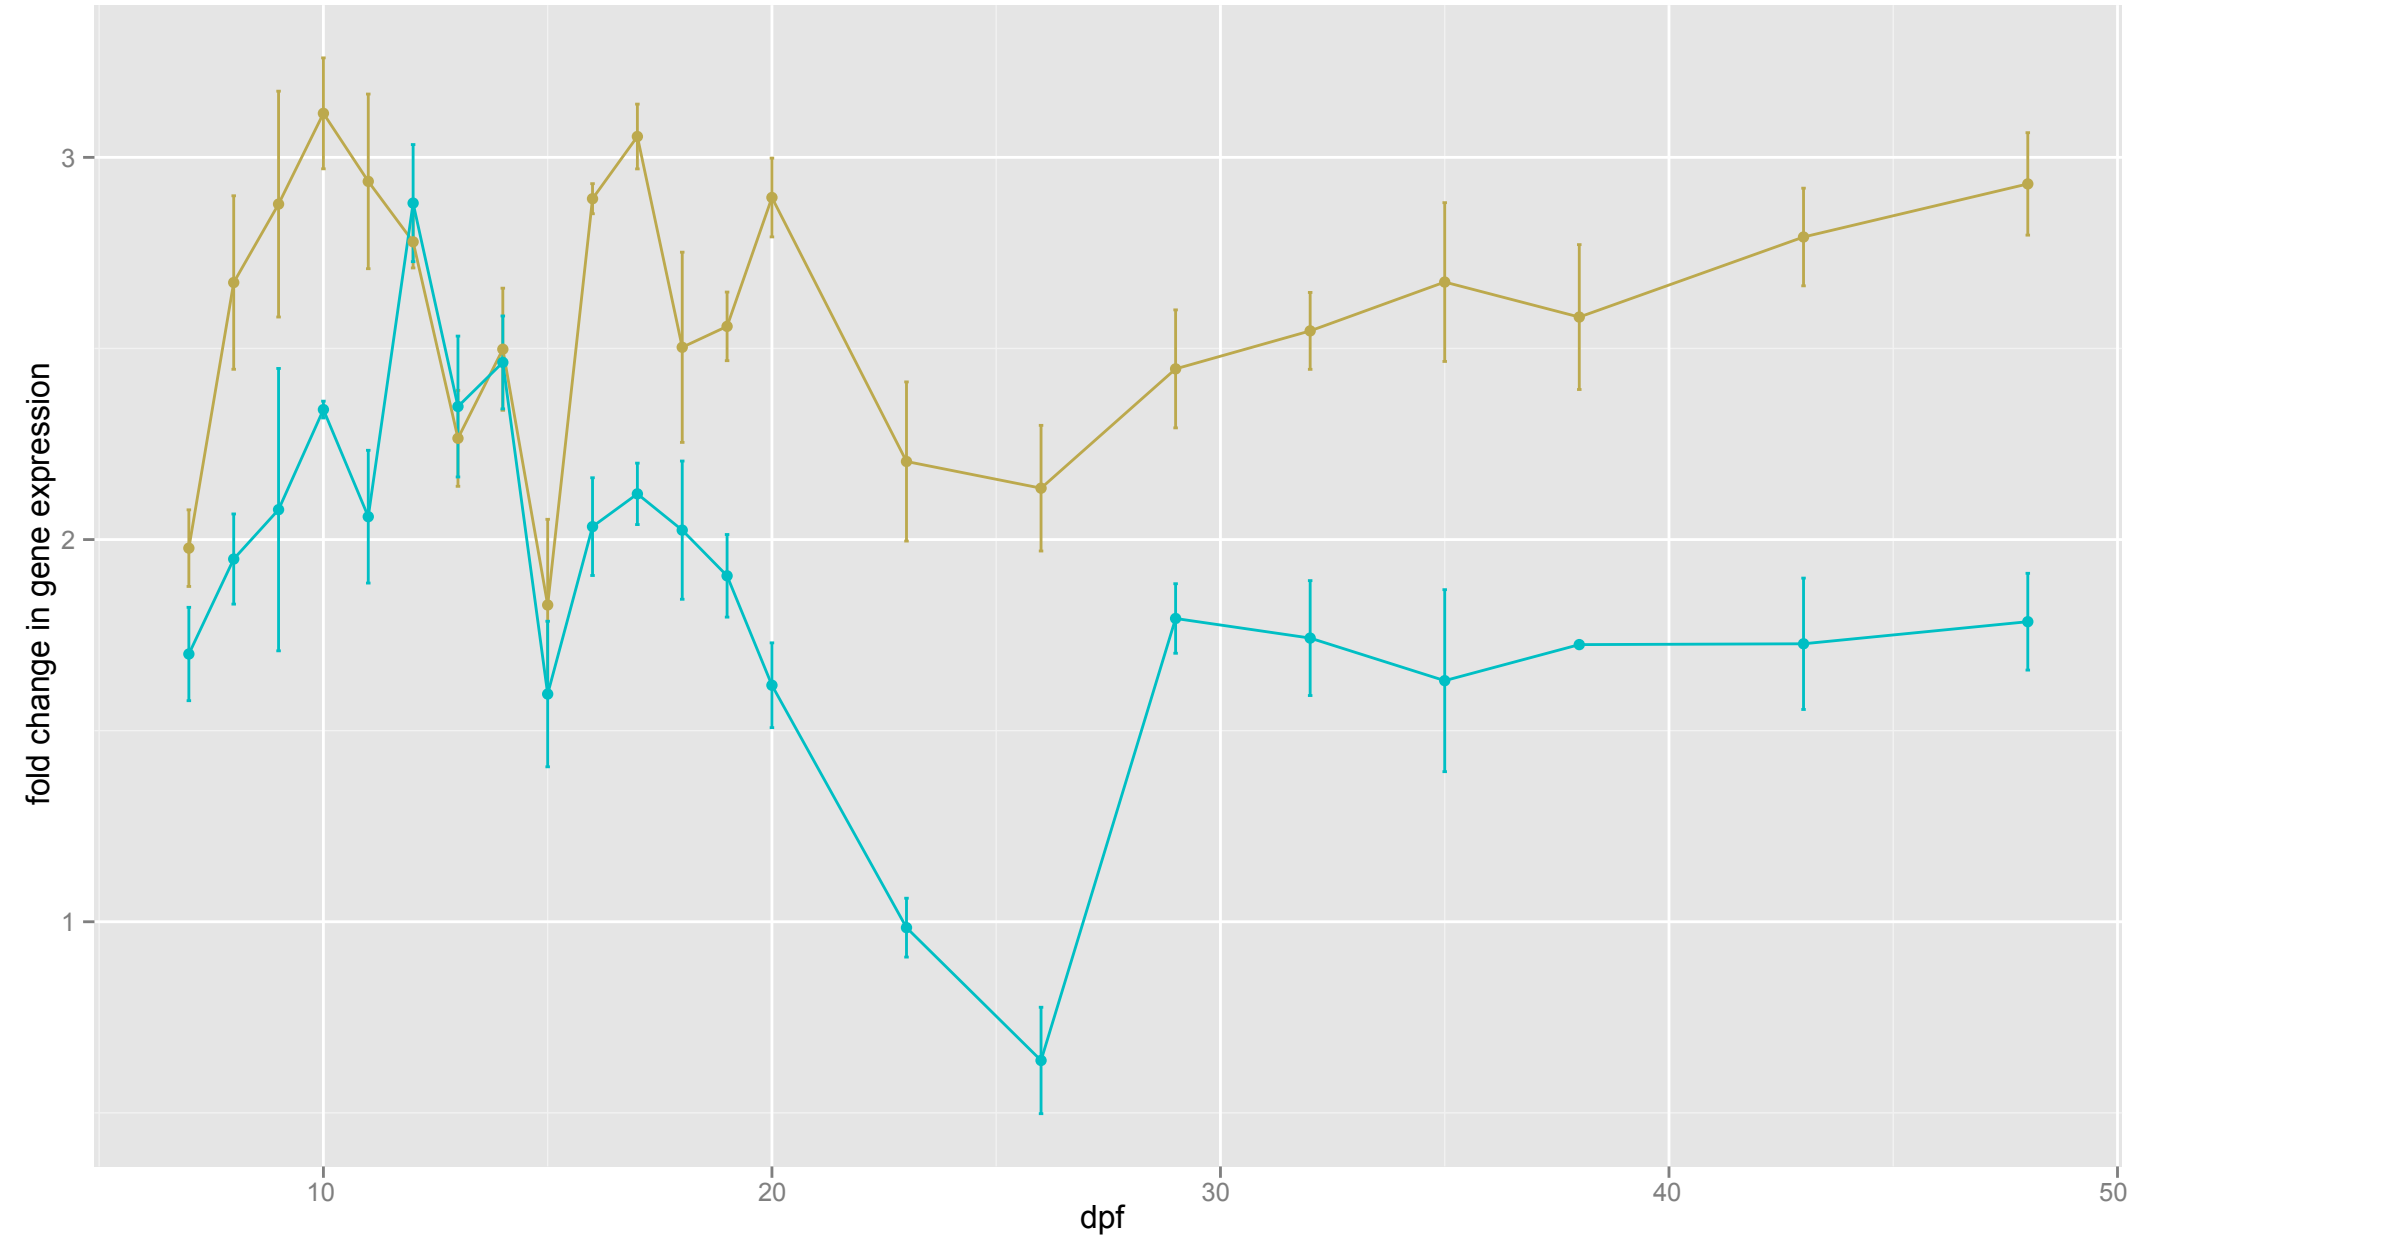

*wnt4B*

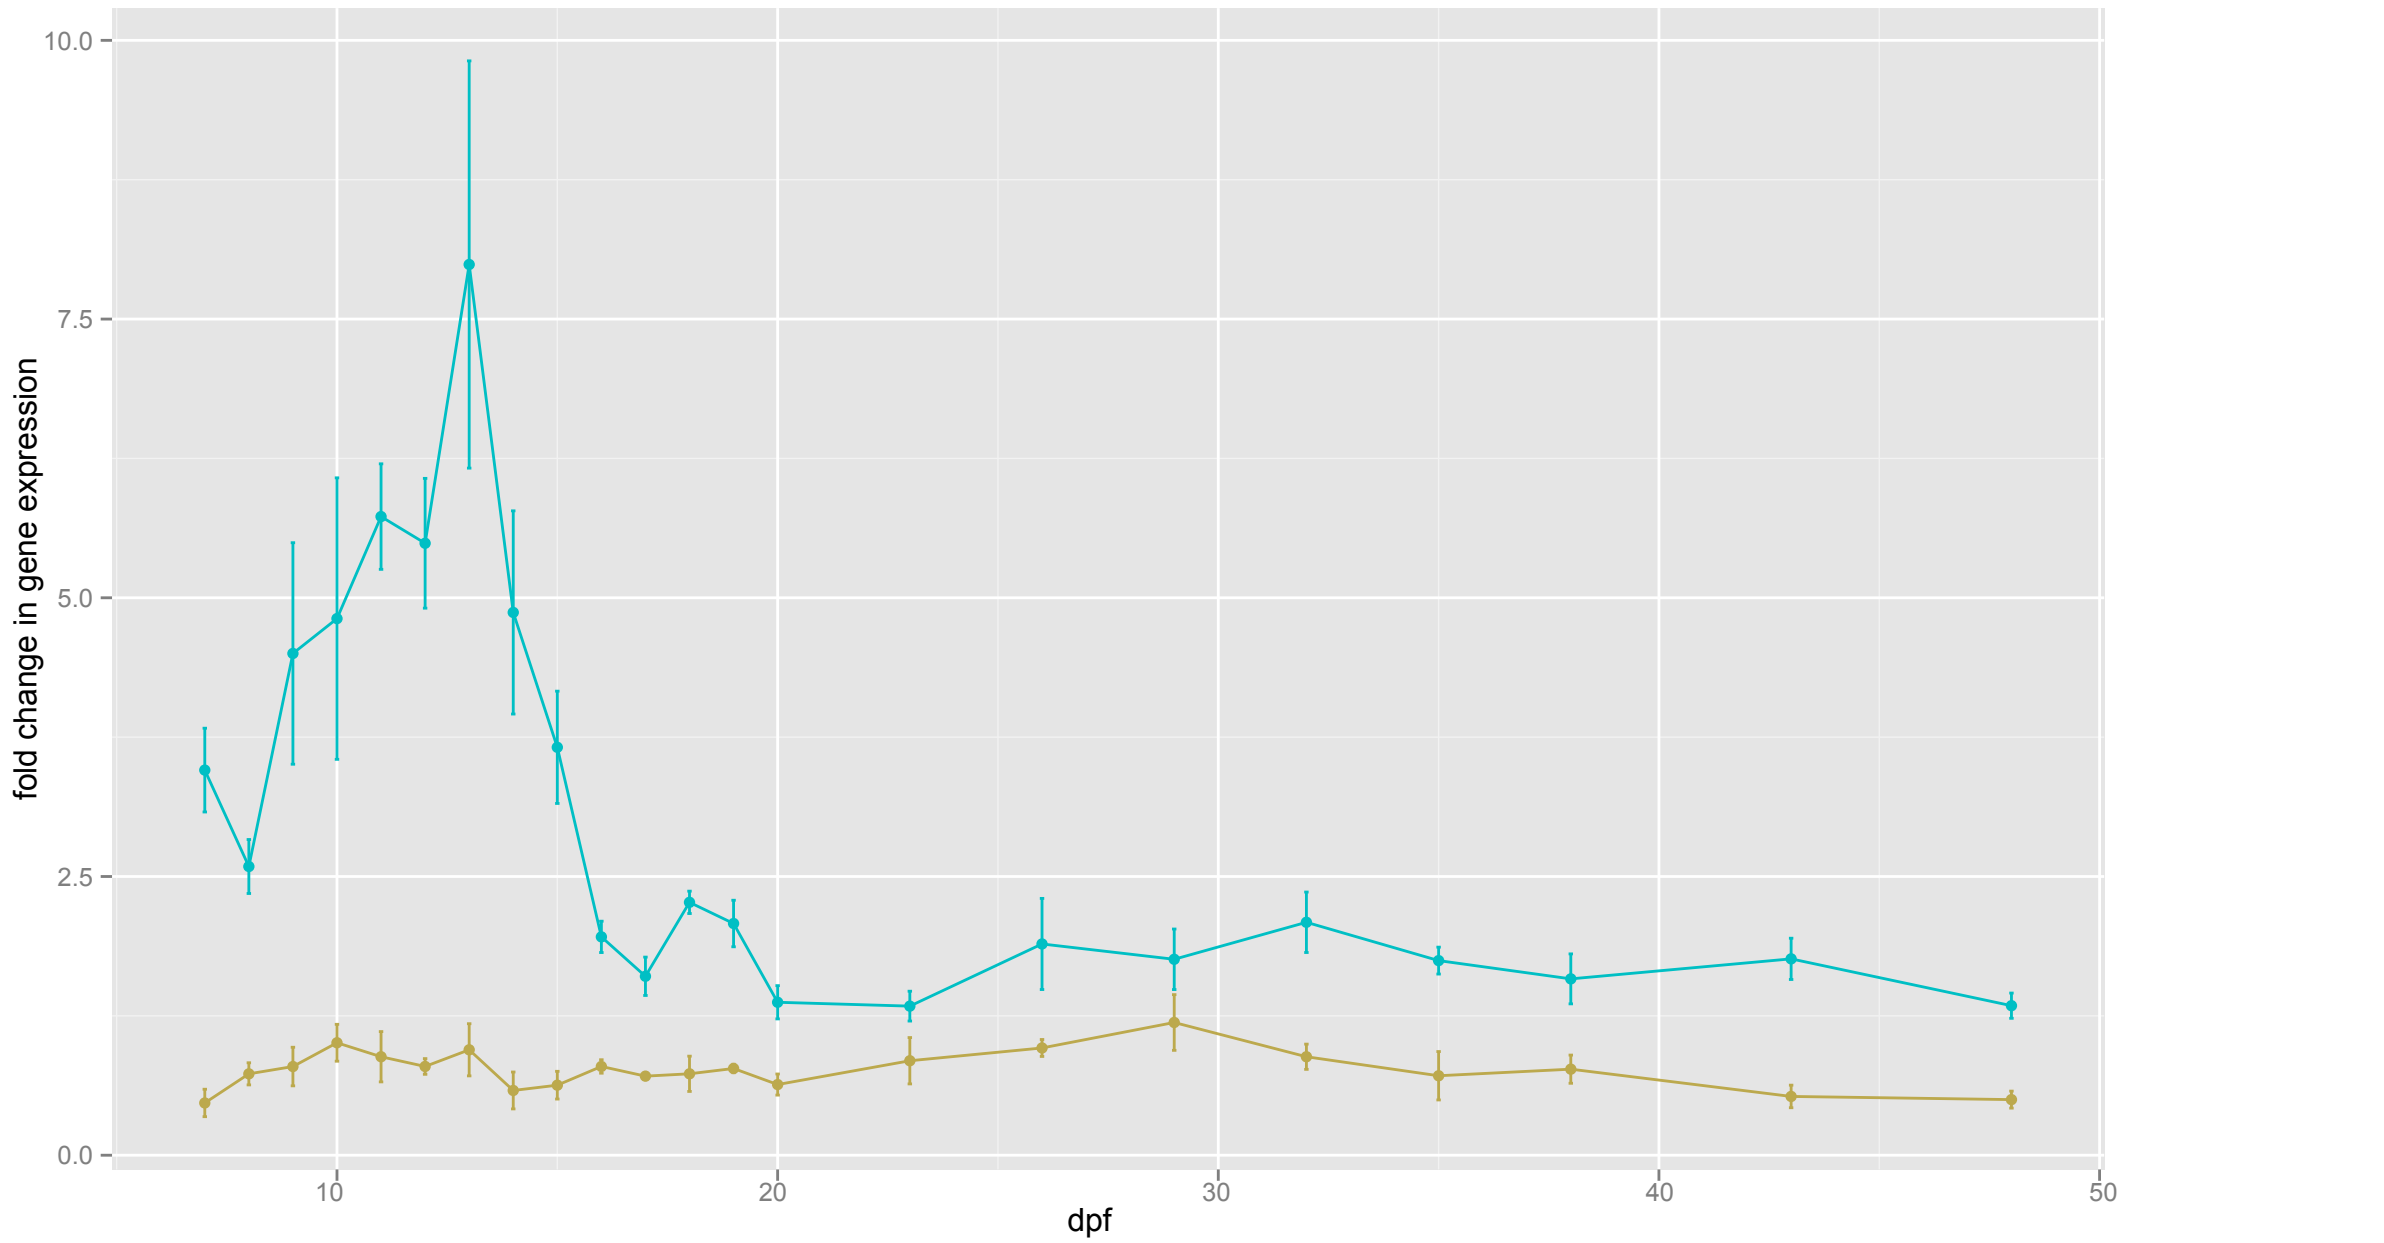

*wt1A*

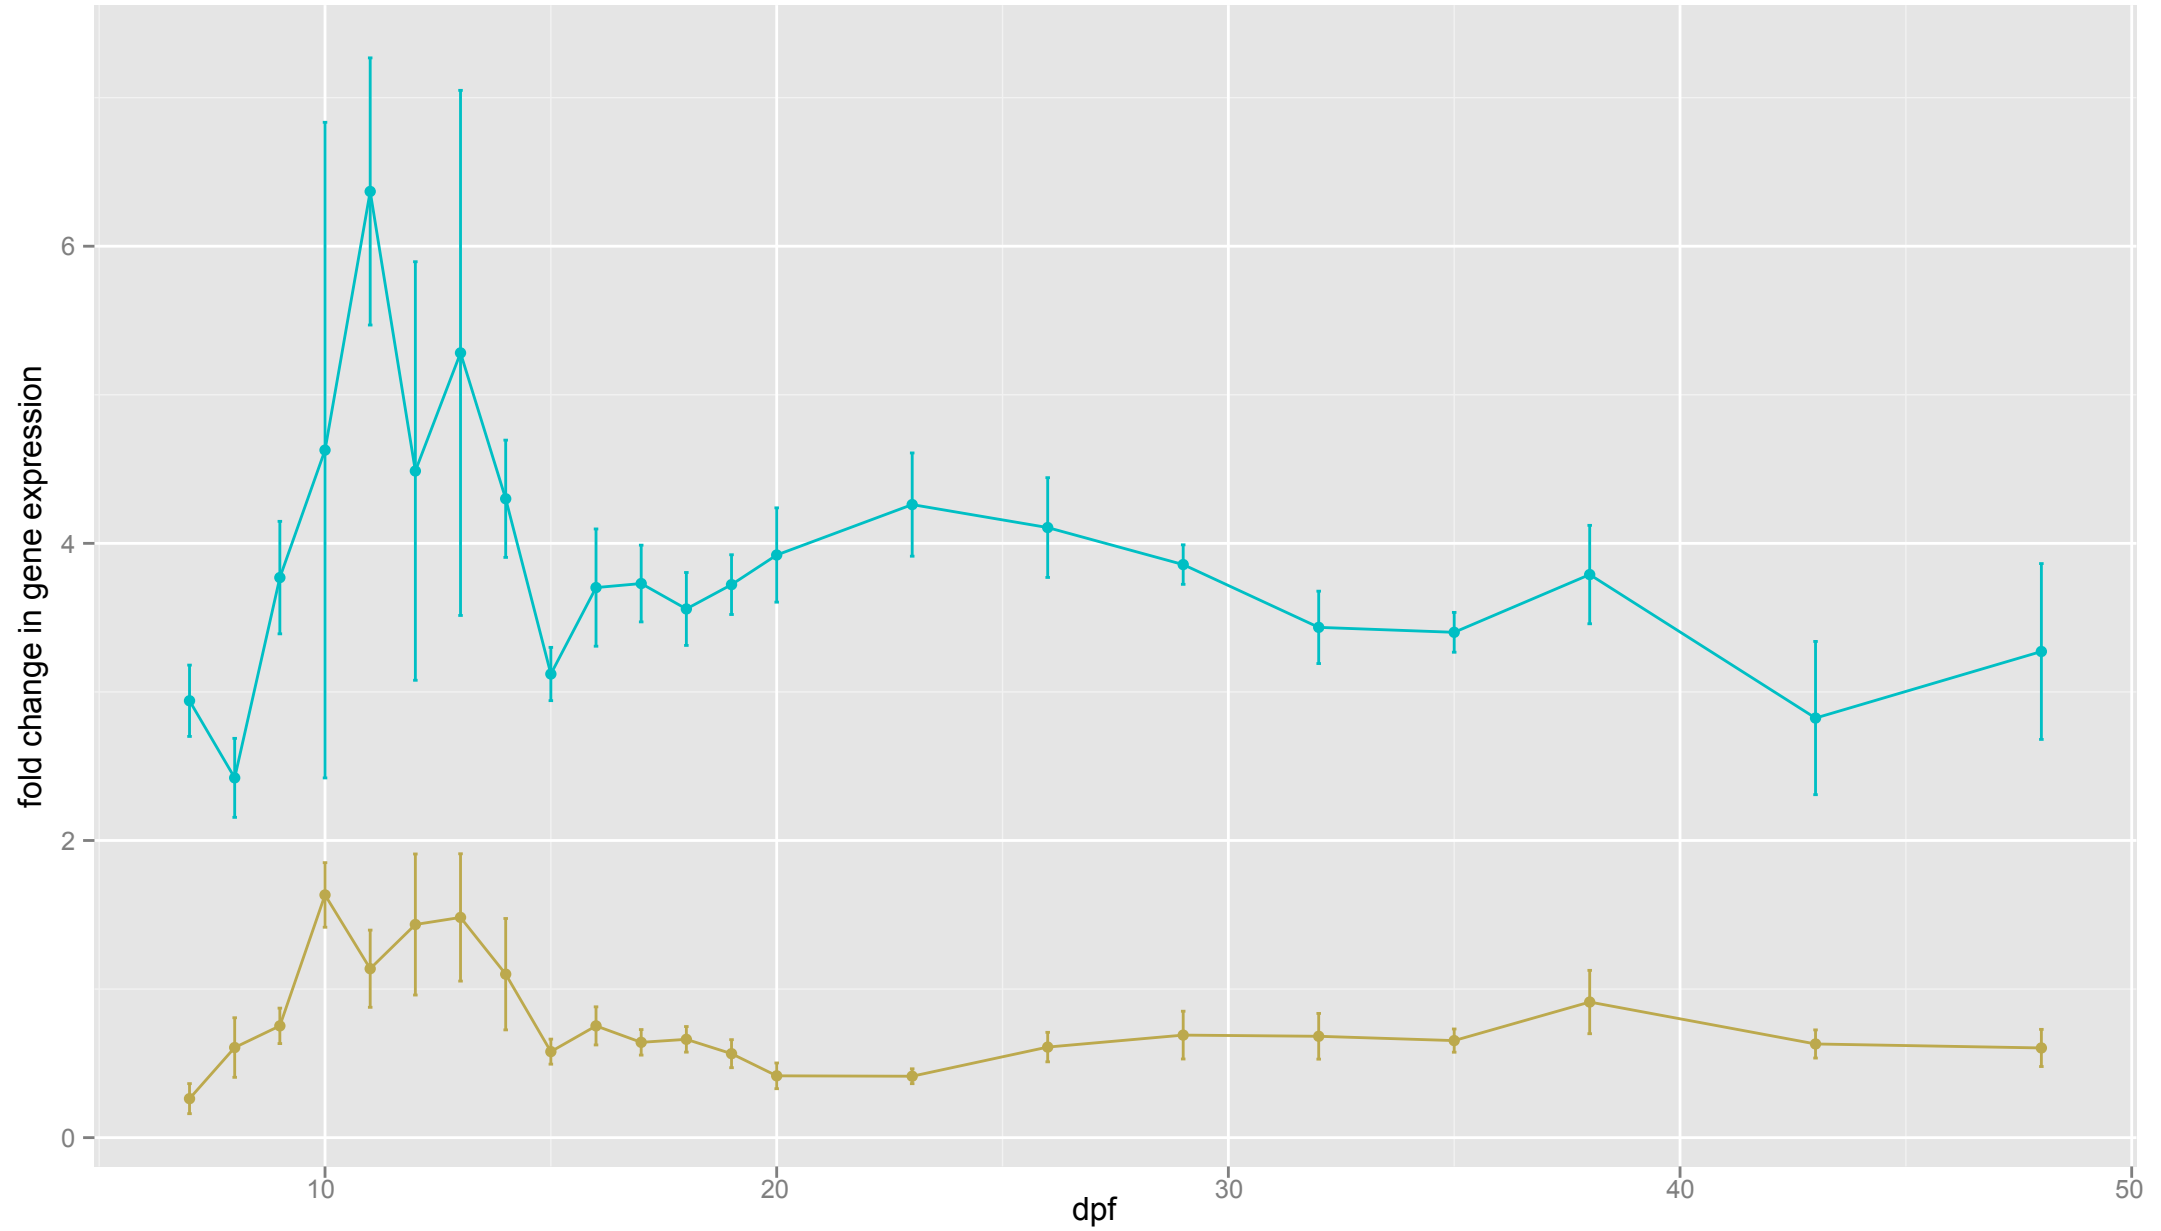

*wt1B*

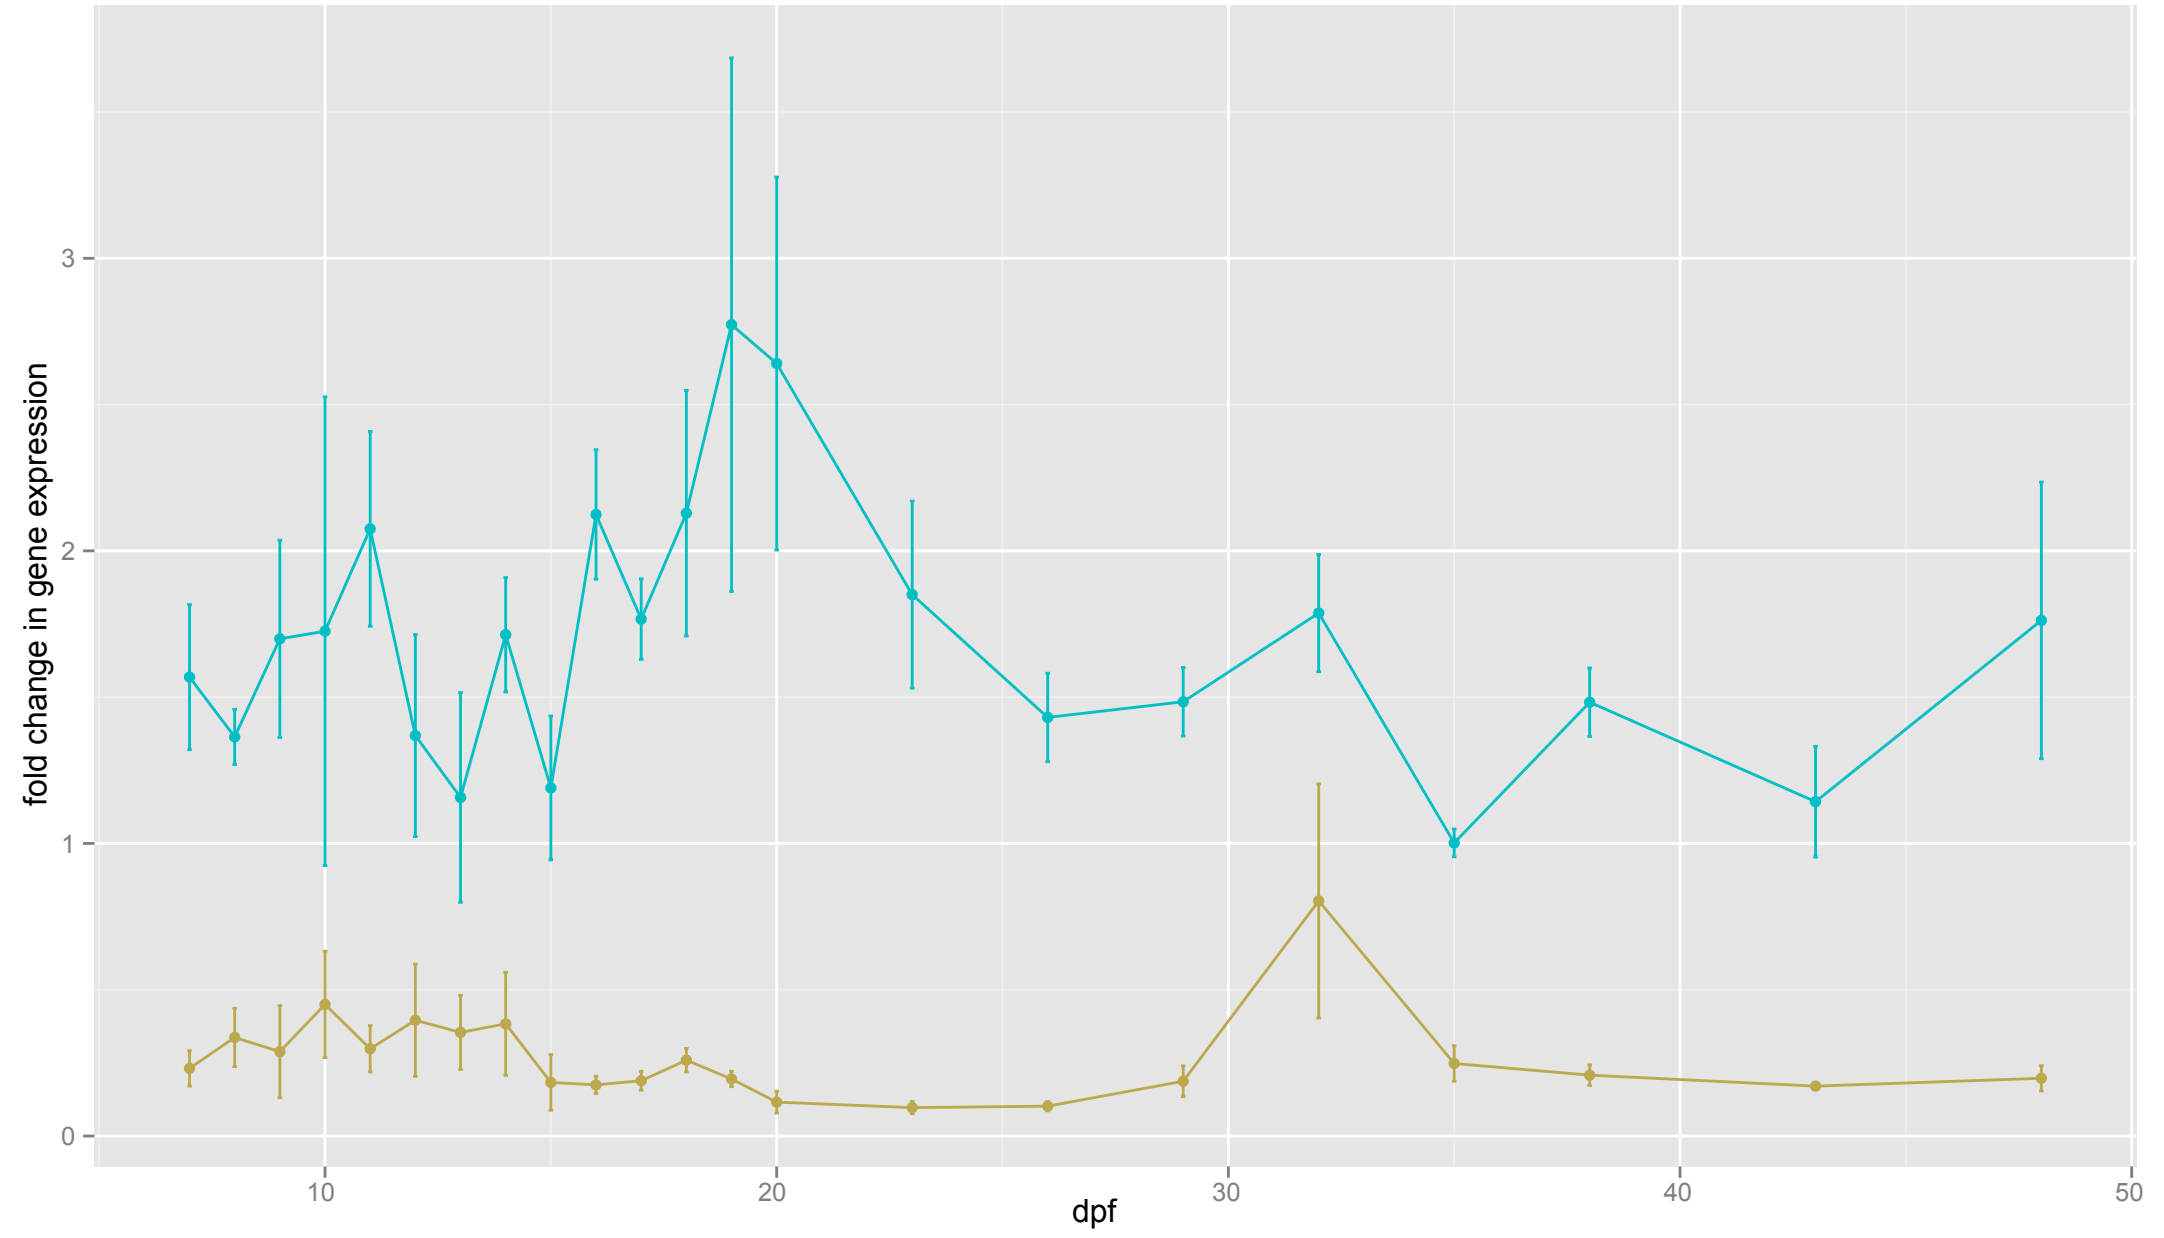

Supplement: 12863_2014_140_MOESM1_ESM.pdf [file 12863_2014_140_MOESM1_ESM.pdf]
