# Supplementary material for: Genetics and timing of sex determination in the East African cichlid fish Astatotilapia burtoni
Source: PubMed Central journal article supplement (PMC4278230; doi:10.1186/s12863-014-0140-5), 2014-12-14

*ctnb1A* in heads

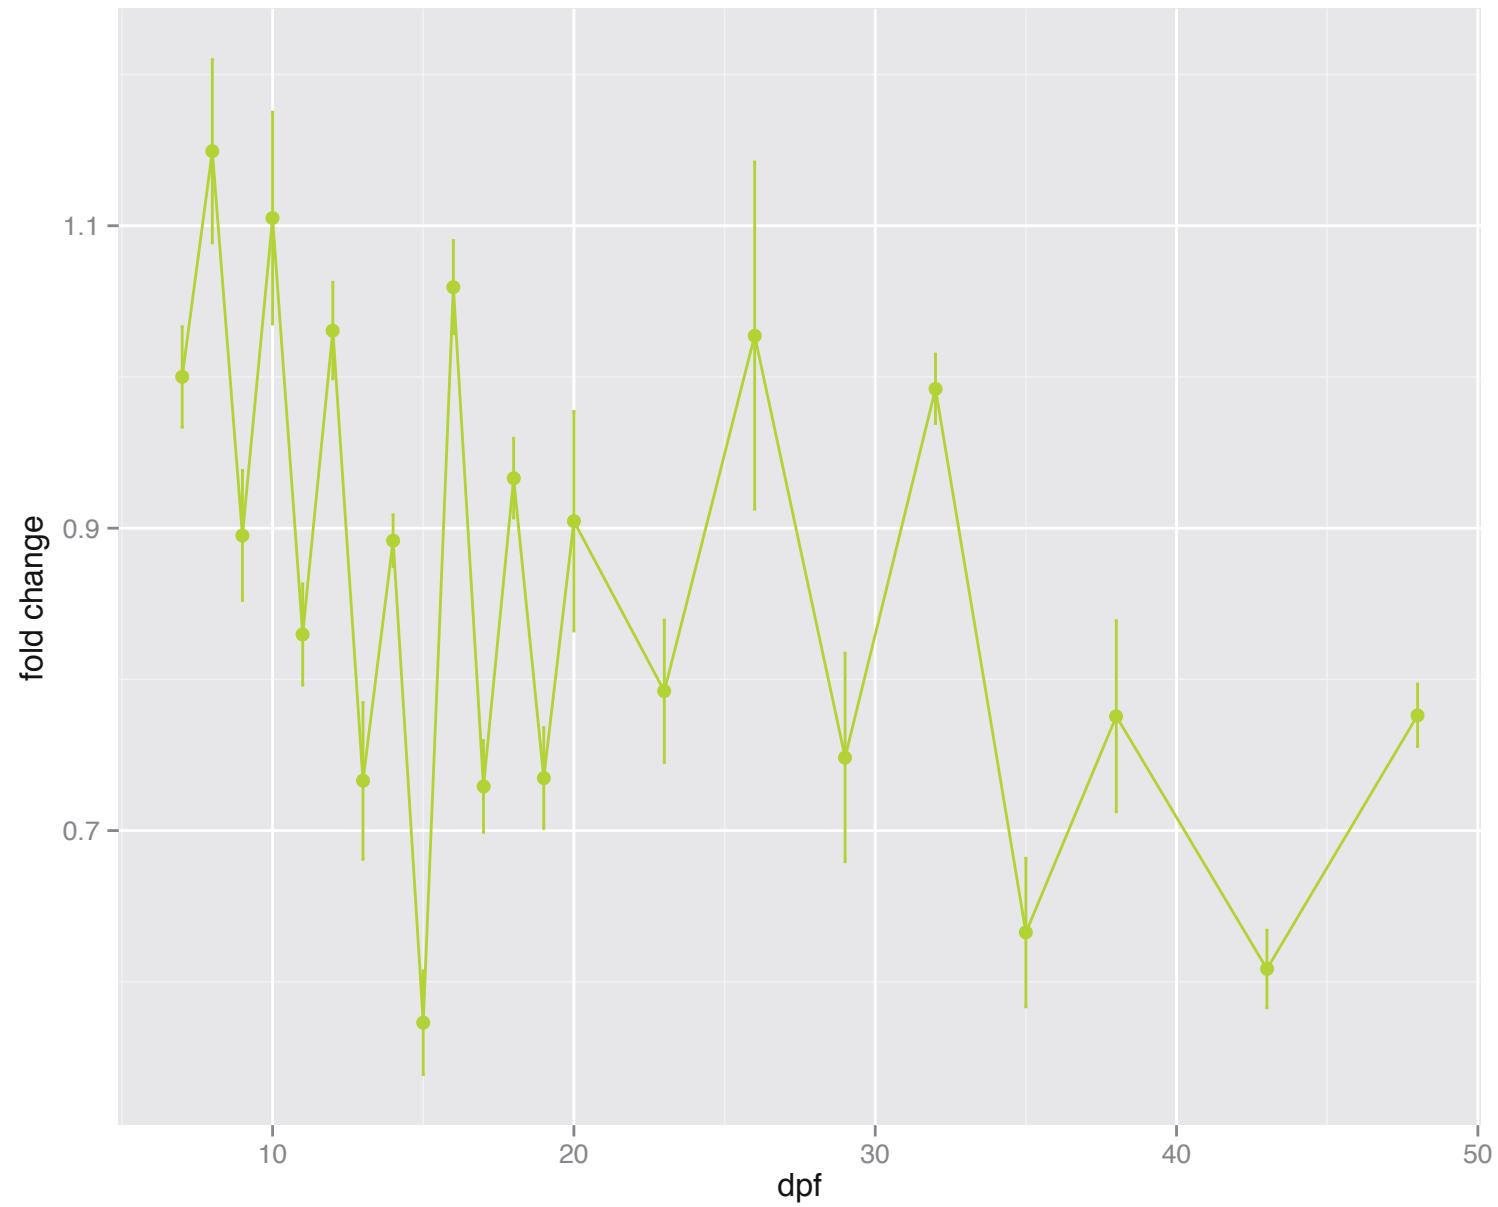

*ctnb1B* in heads

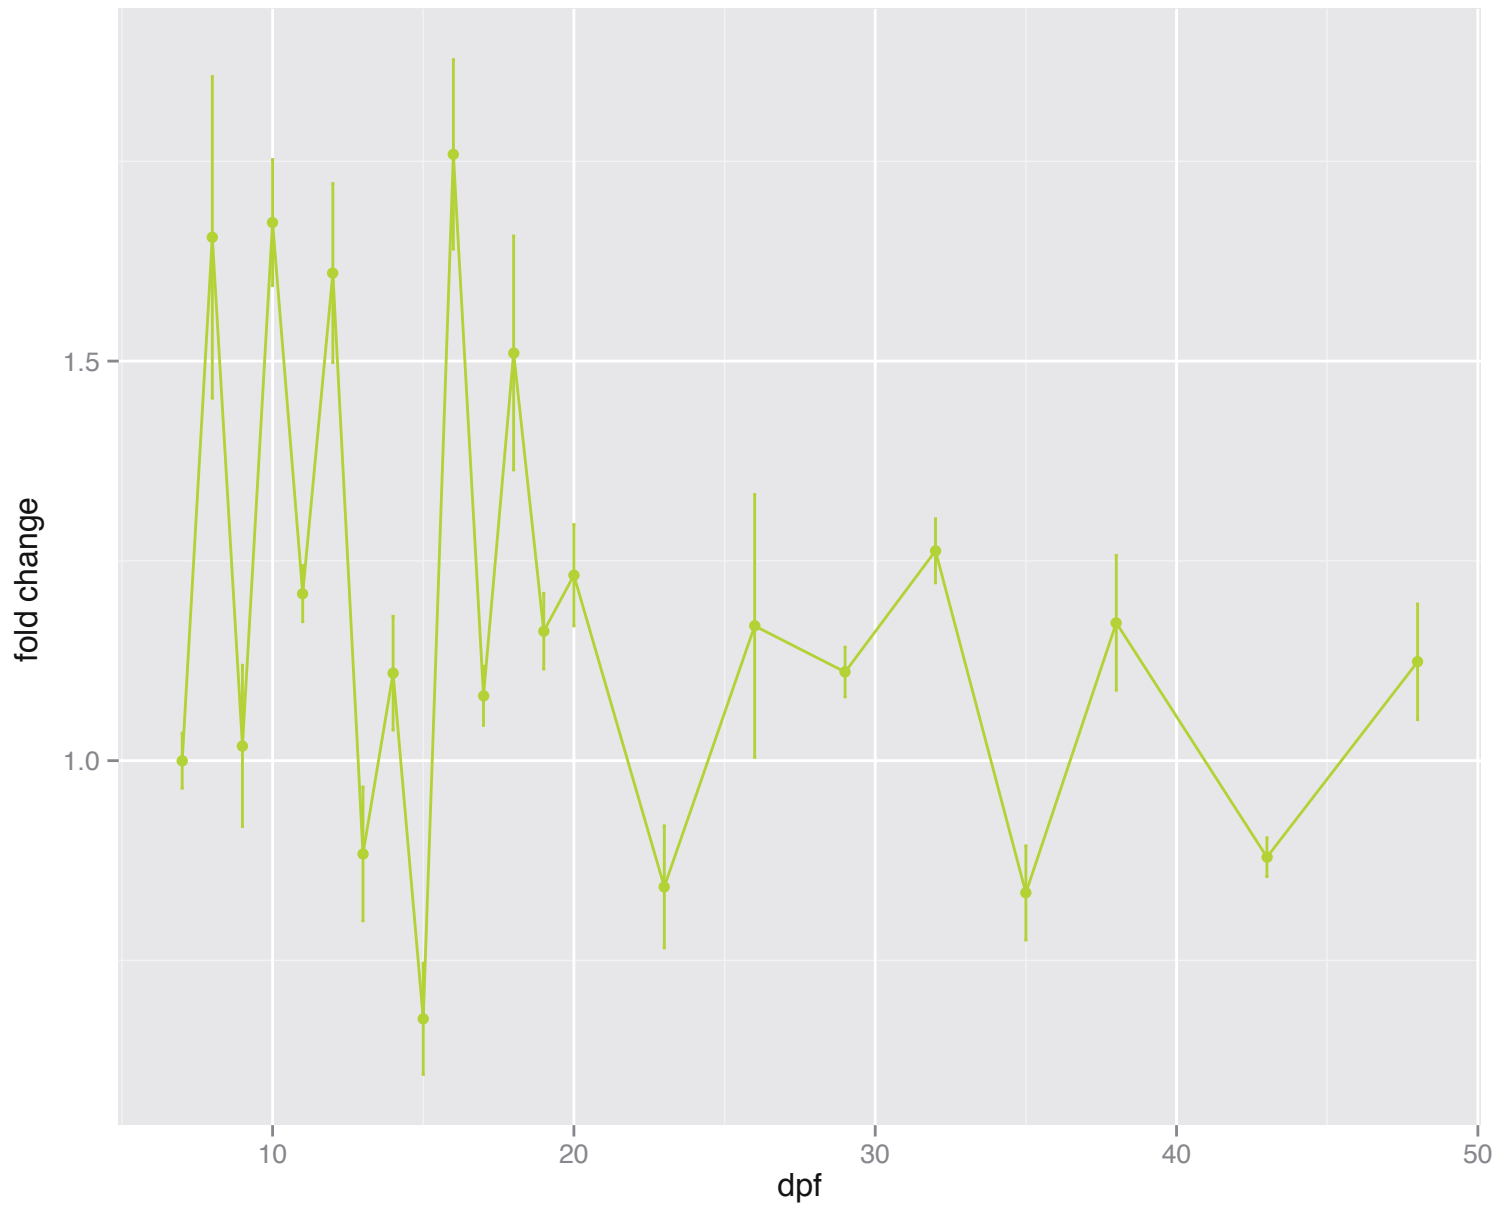

*cyp11b2* in heads

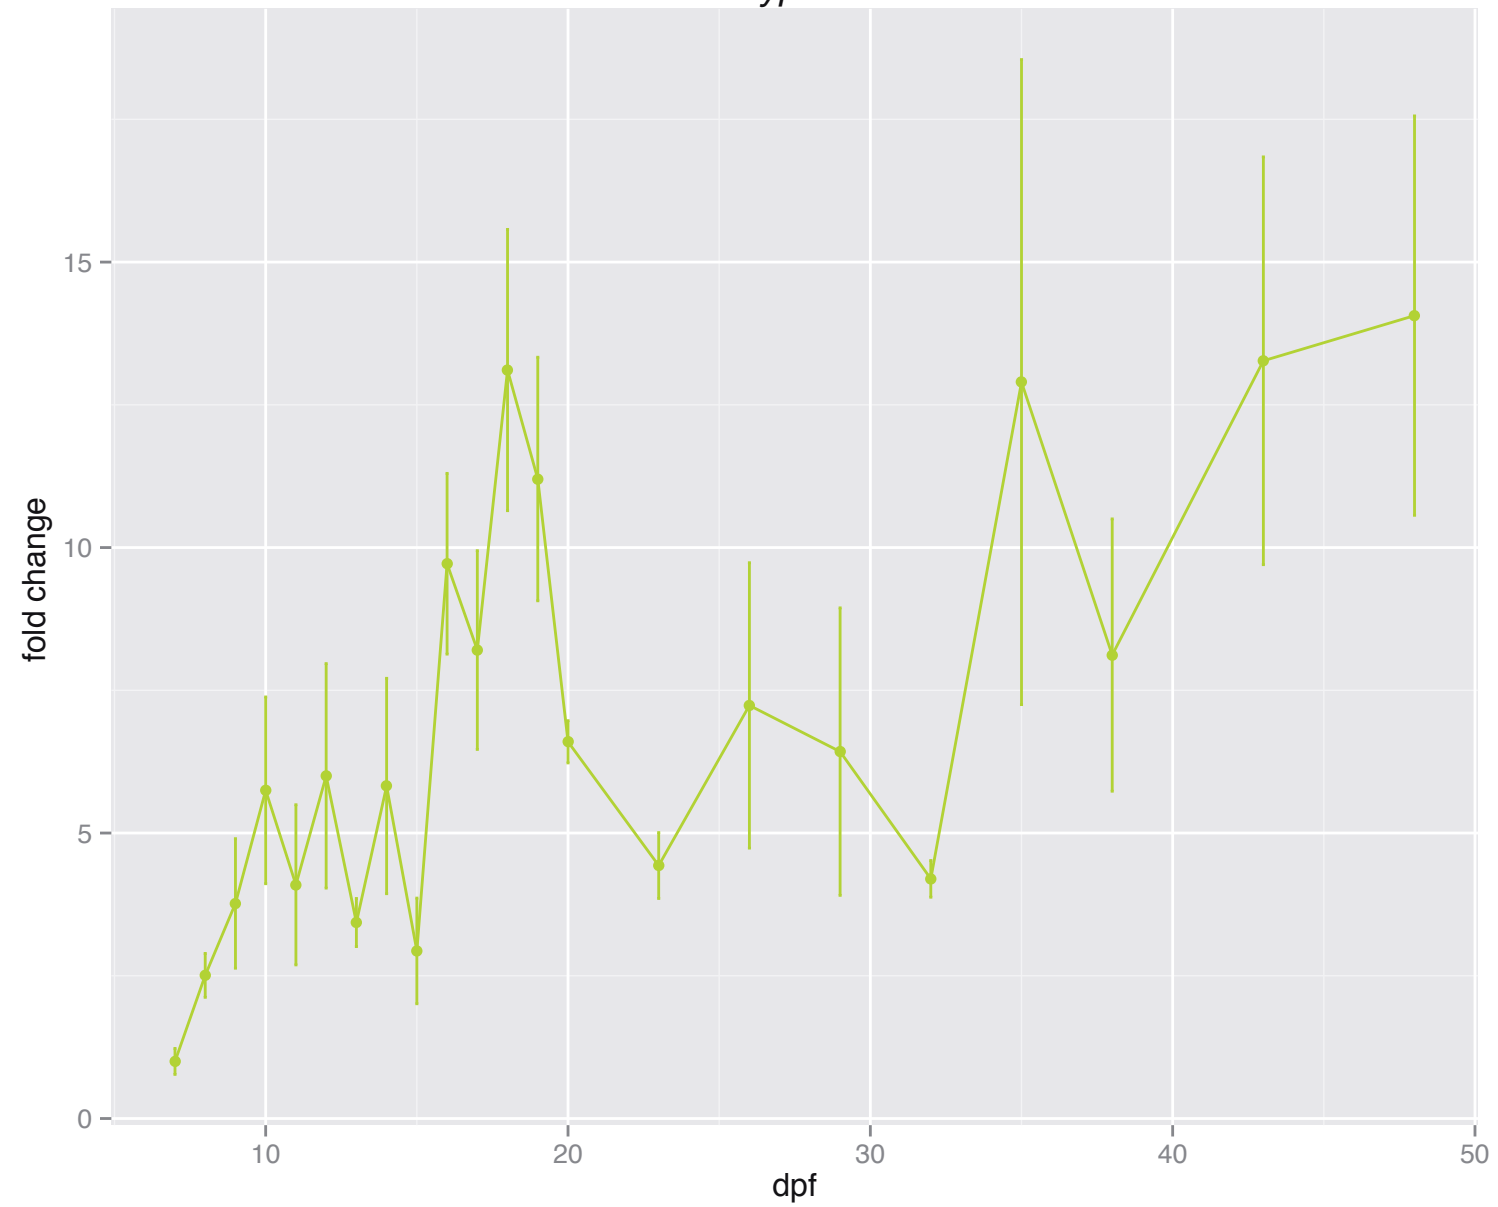

*cyp19a1A* in heads

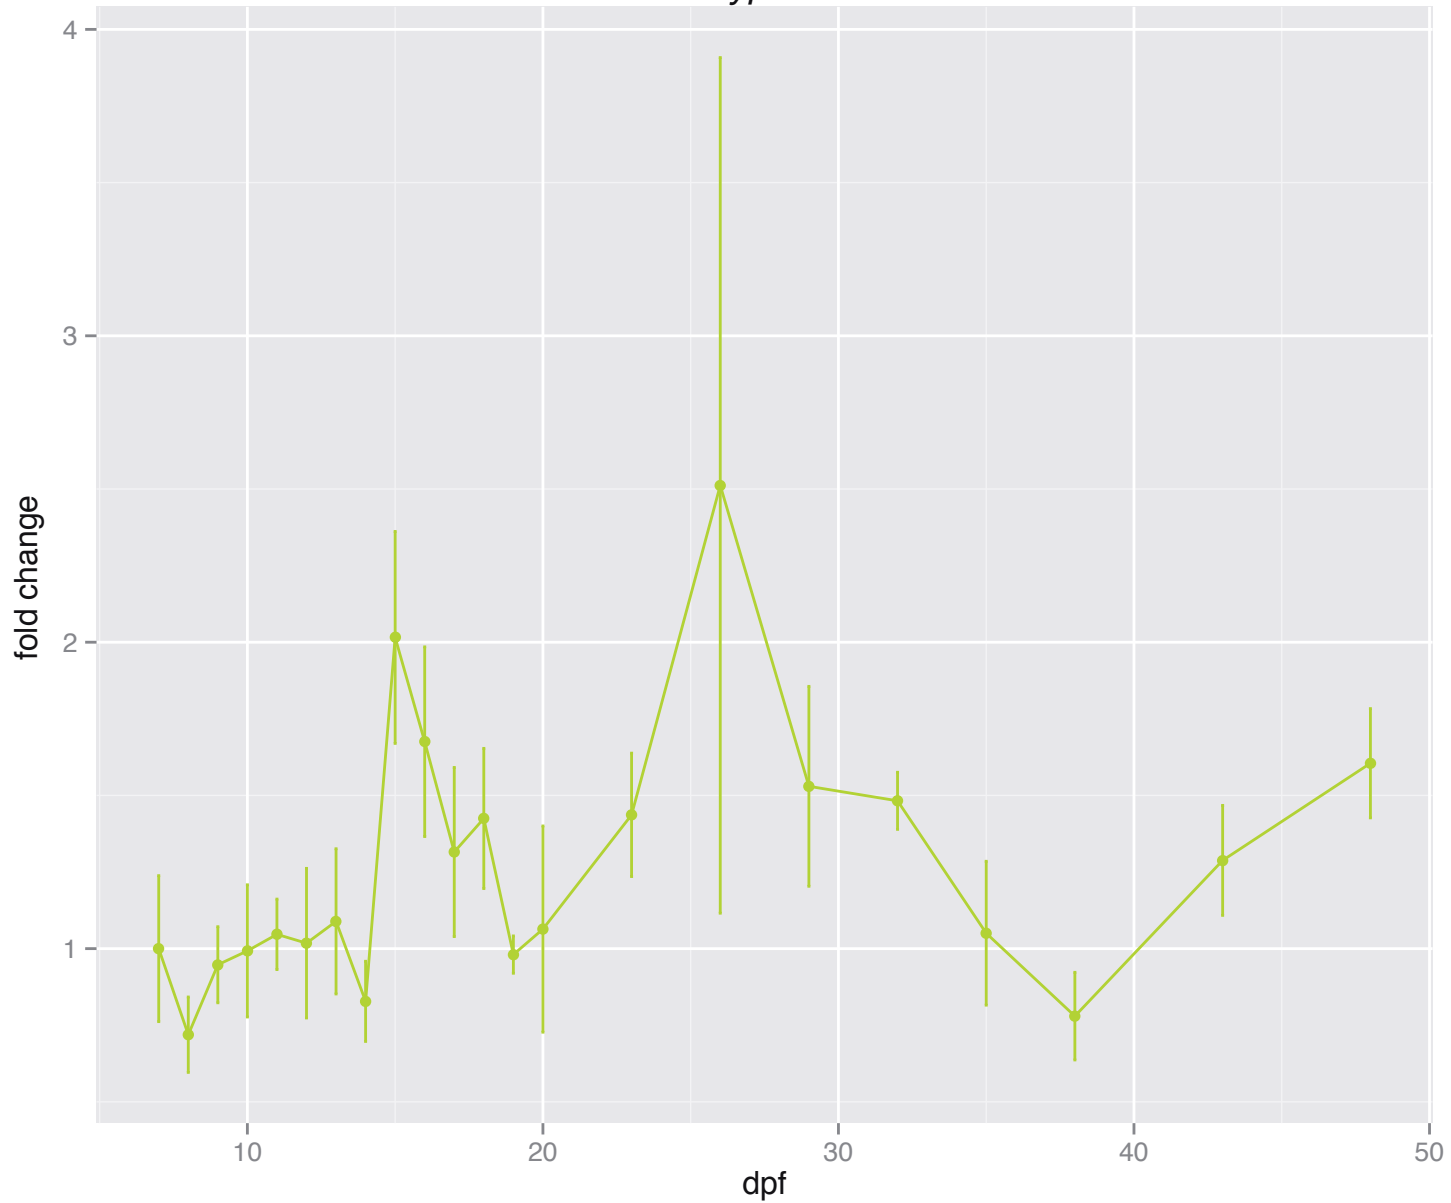

*cyp19a1B* in heads

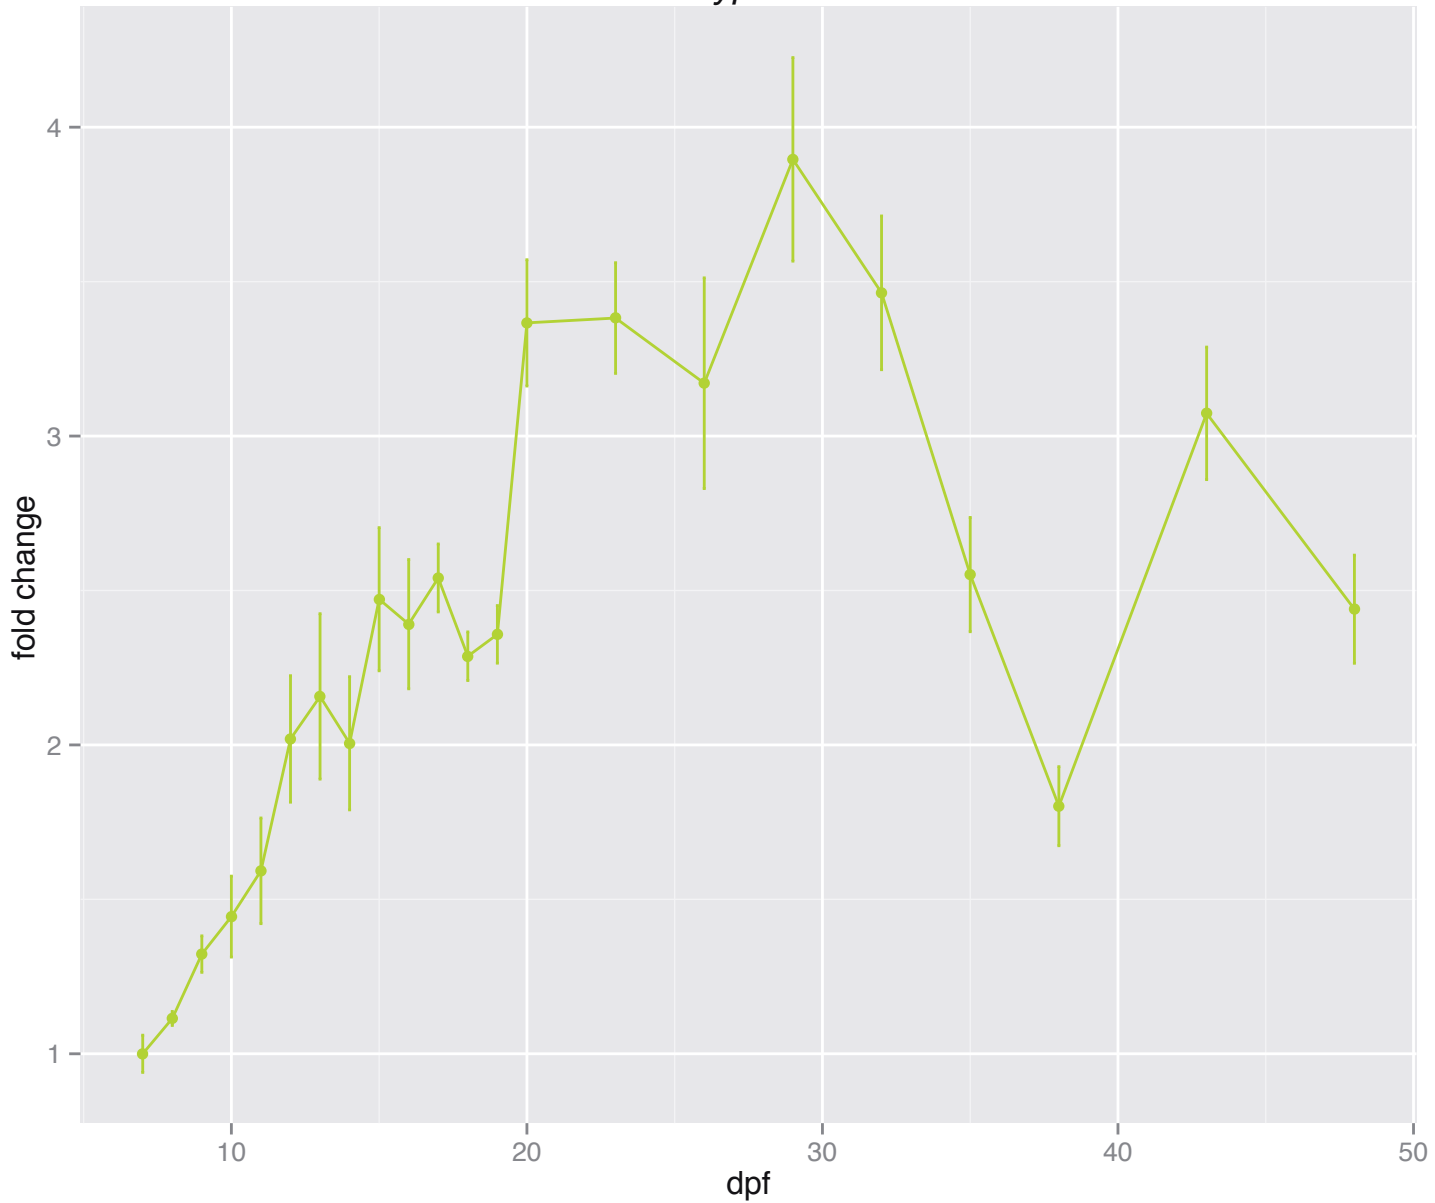

*dax1A* in heads

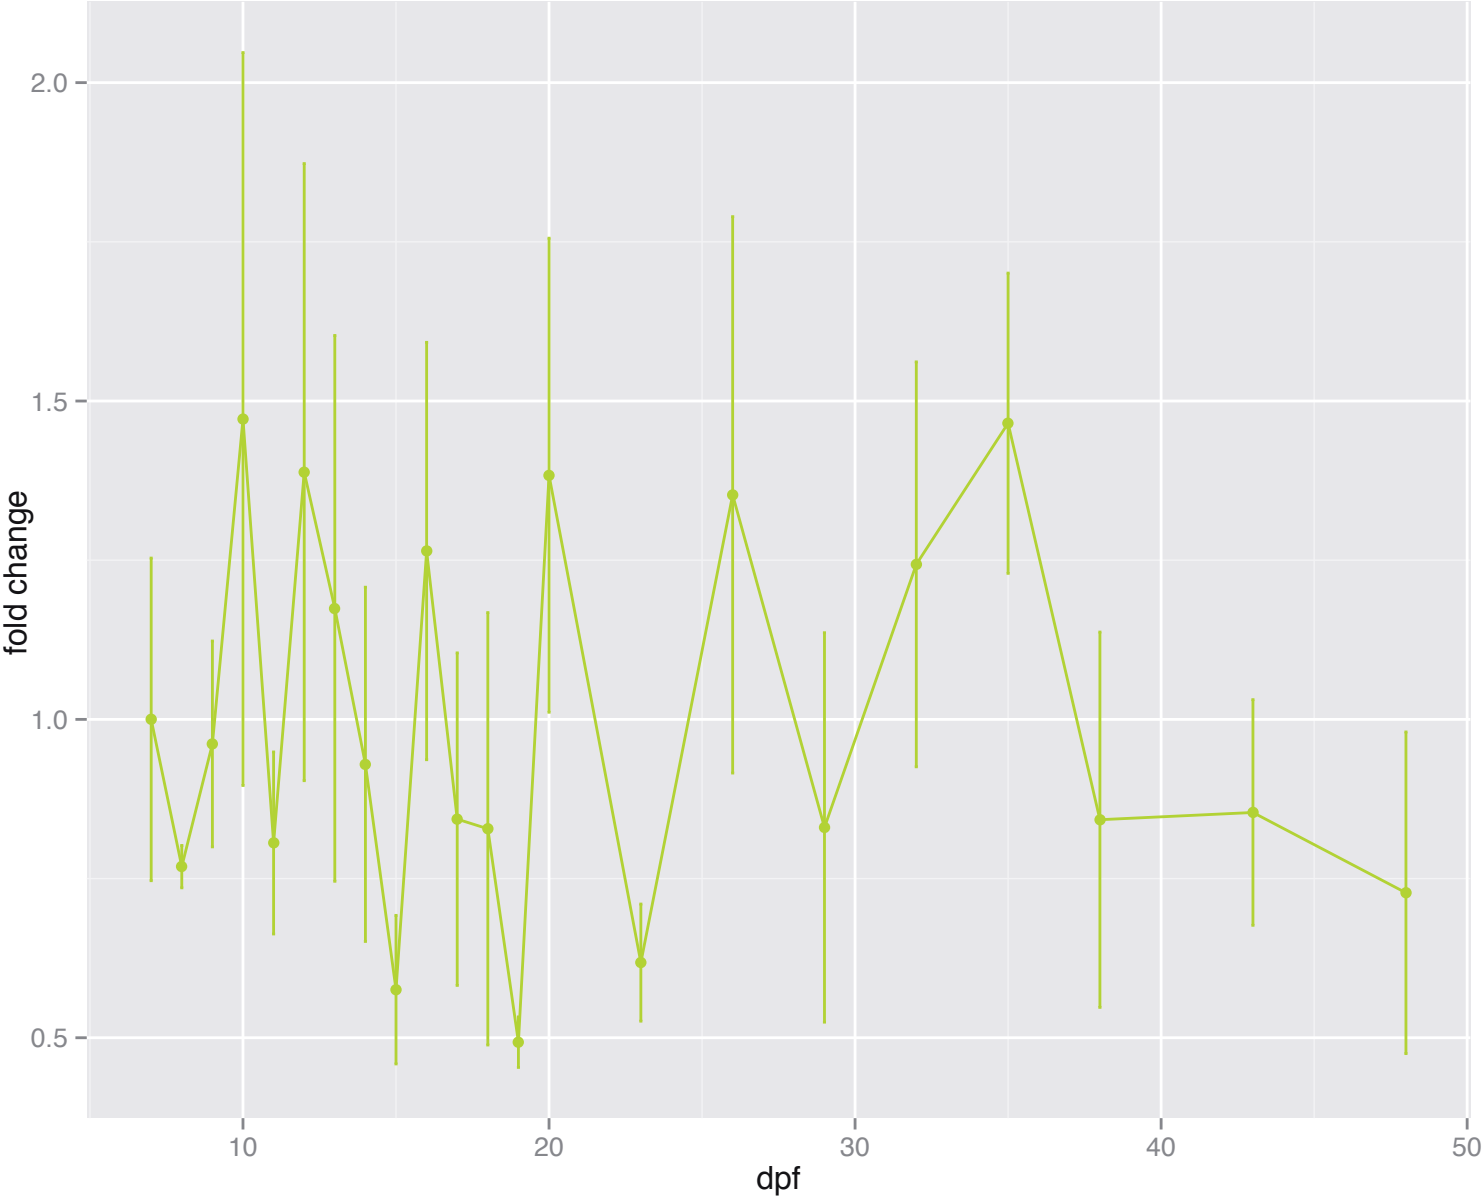

*dmrt1* in heads

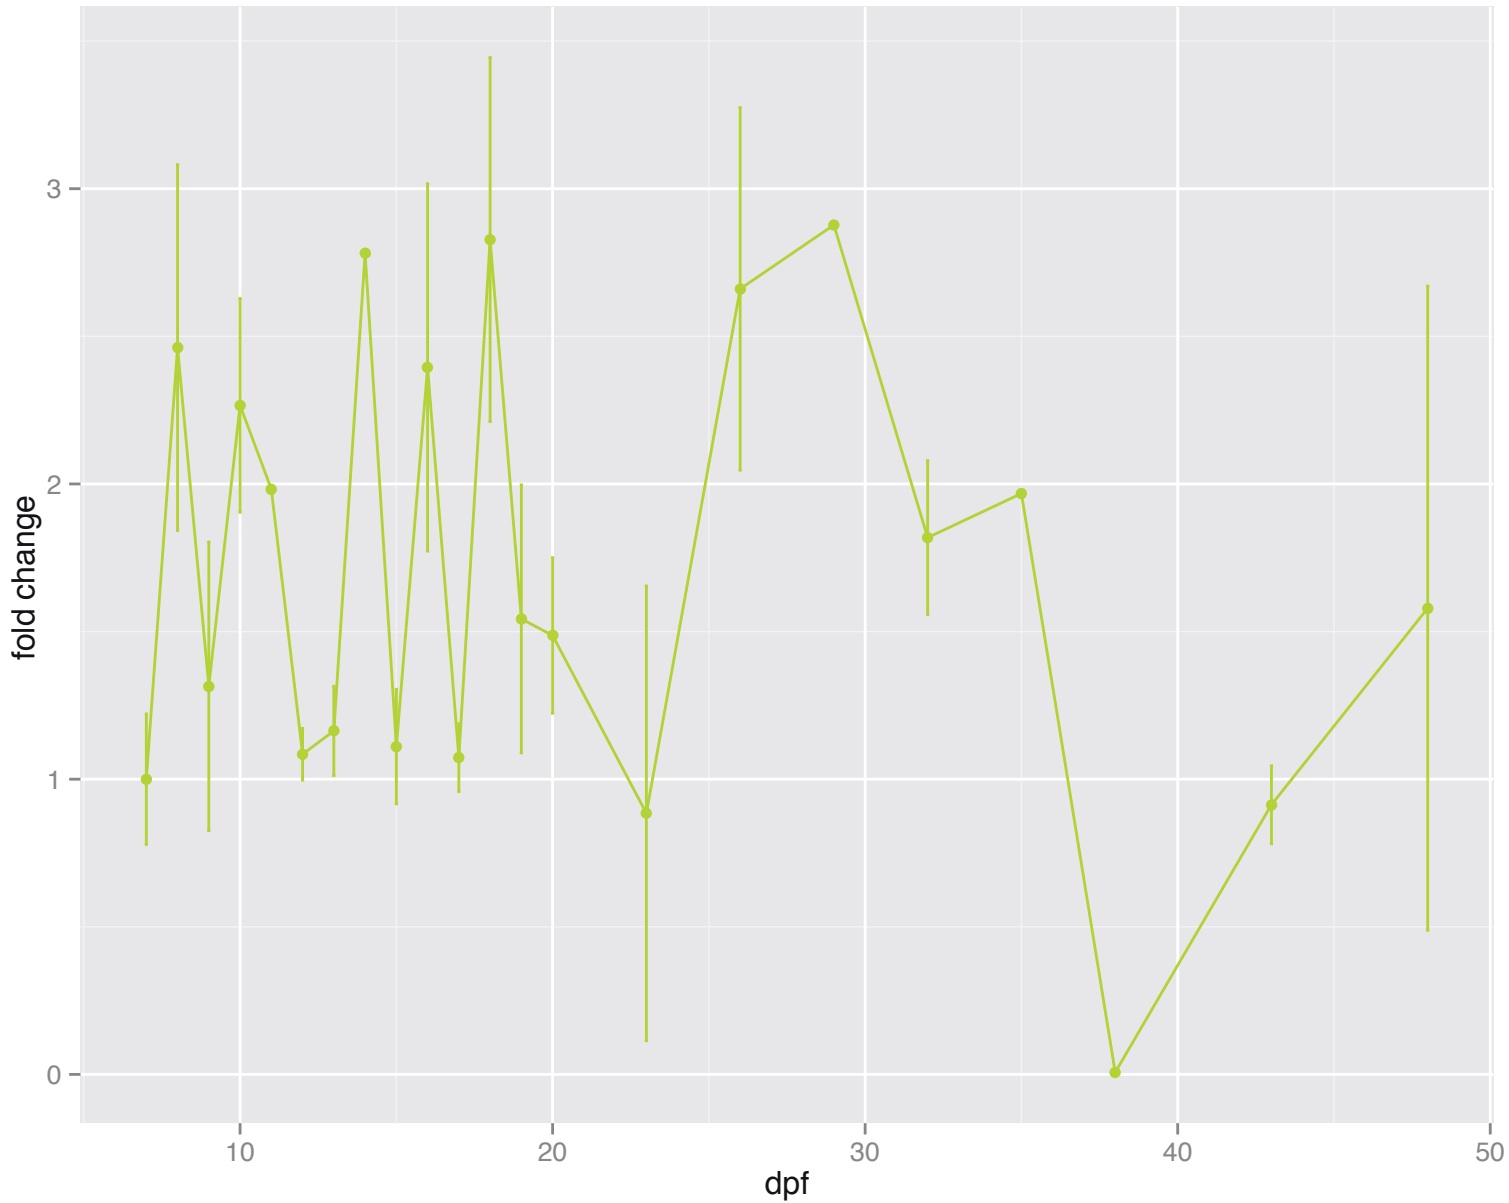

*figla* in heads

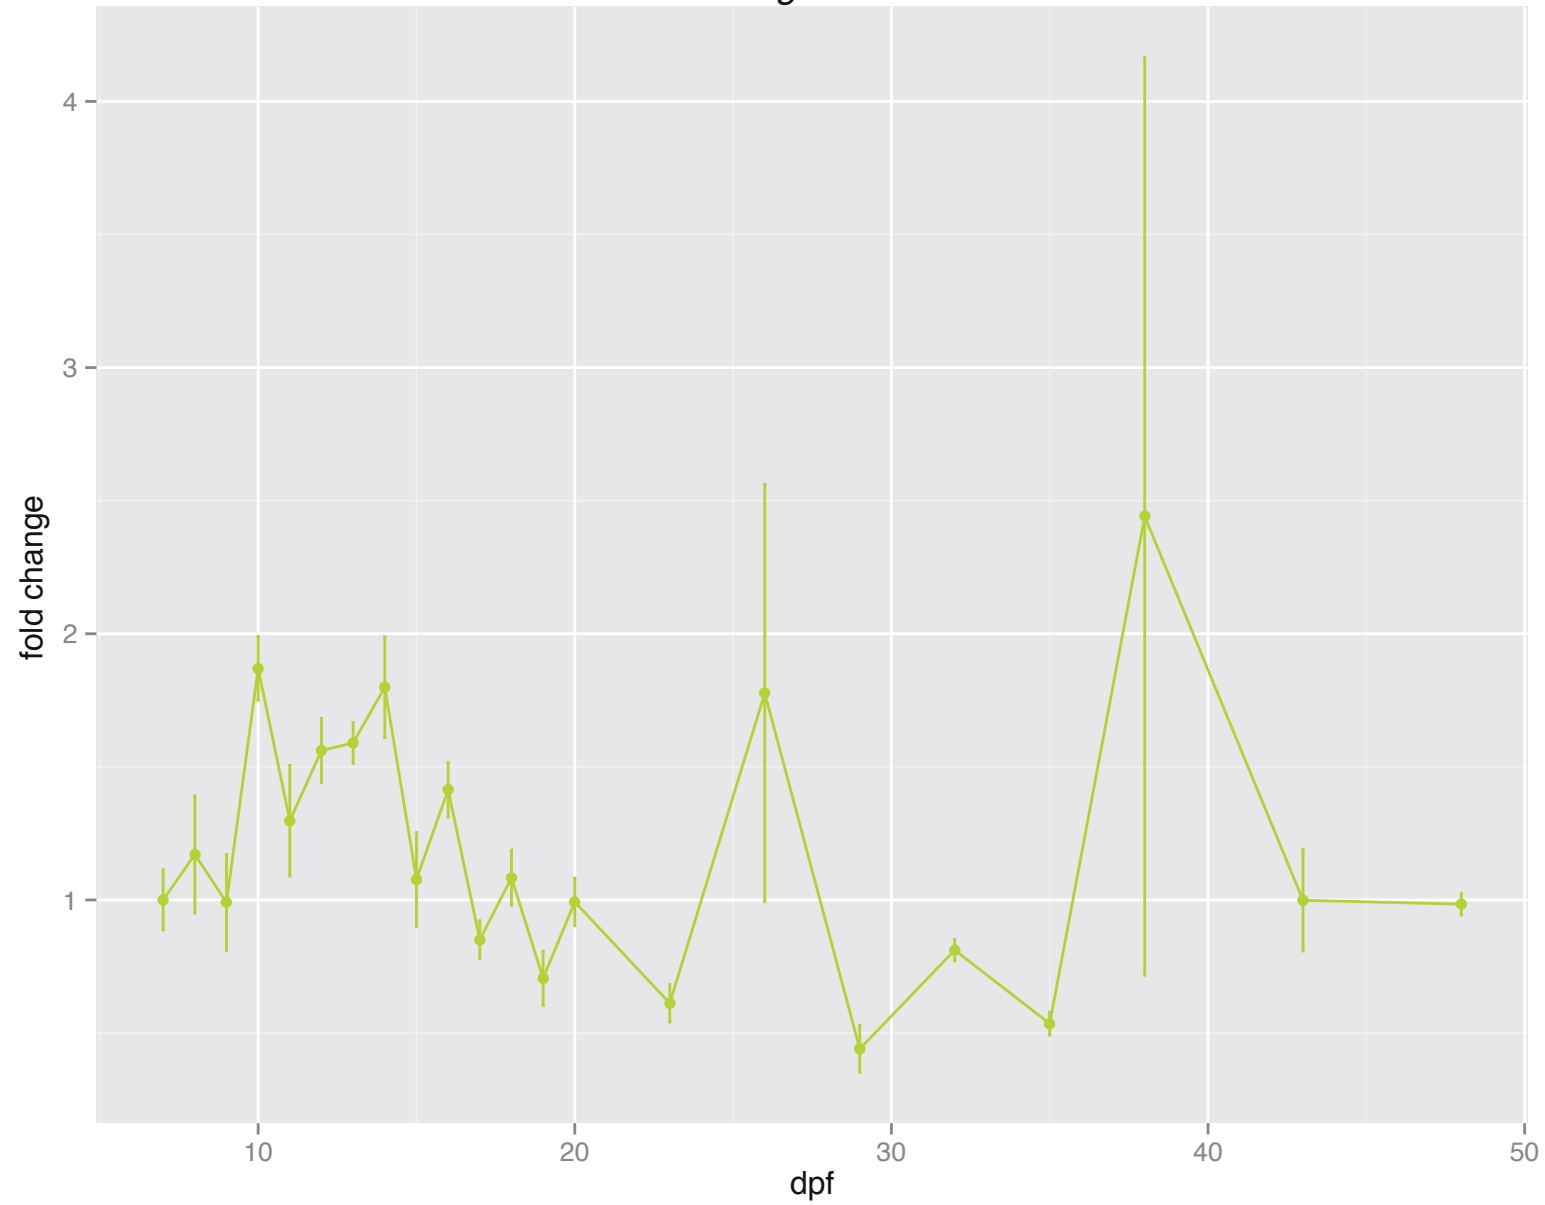



*foxl2A/foxl2* in heads

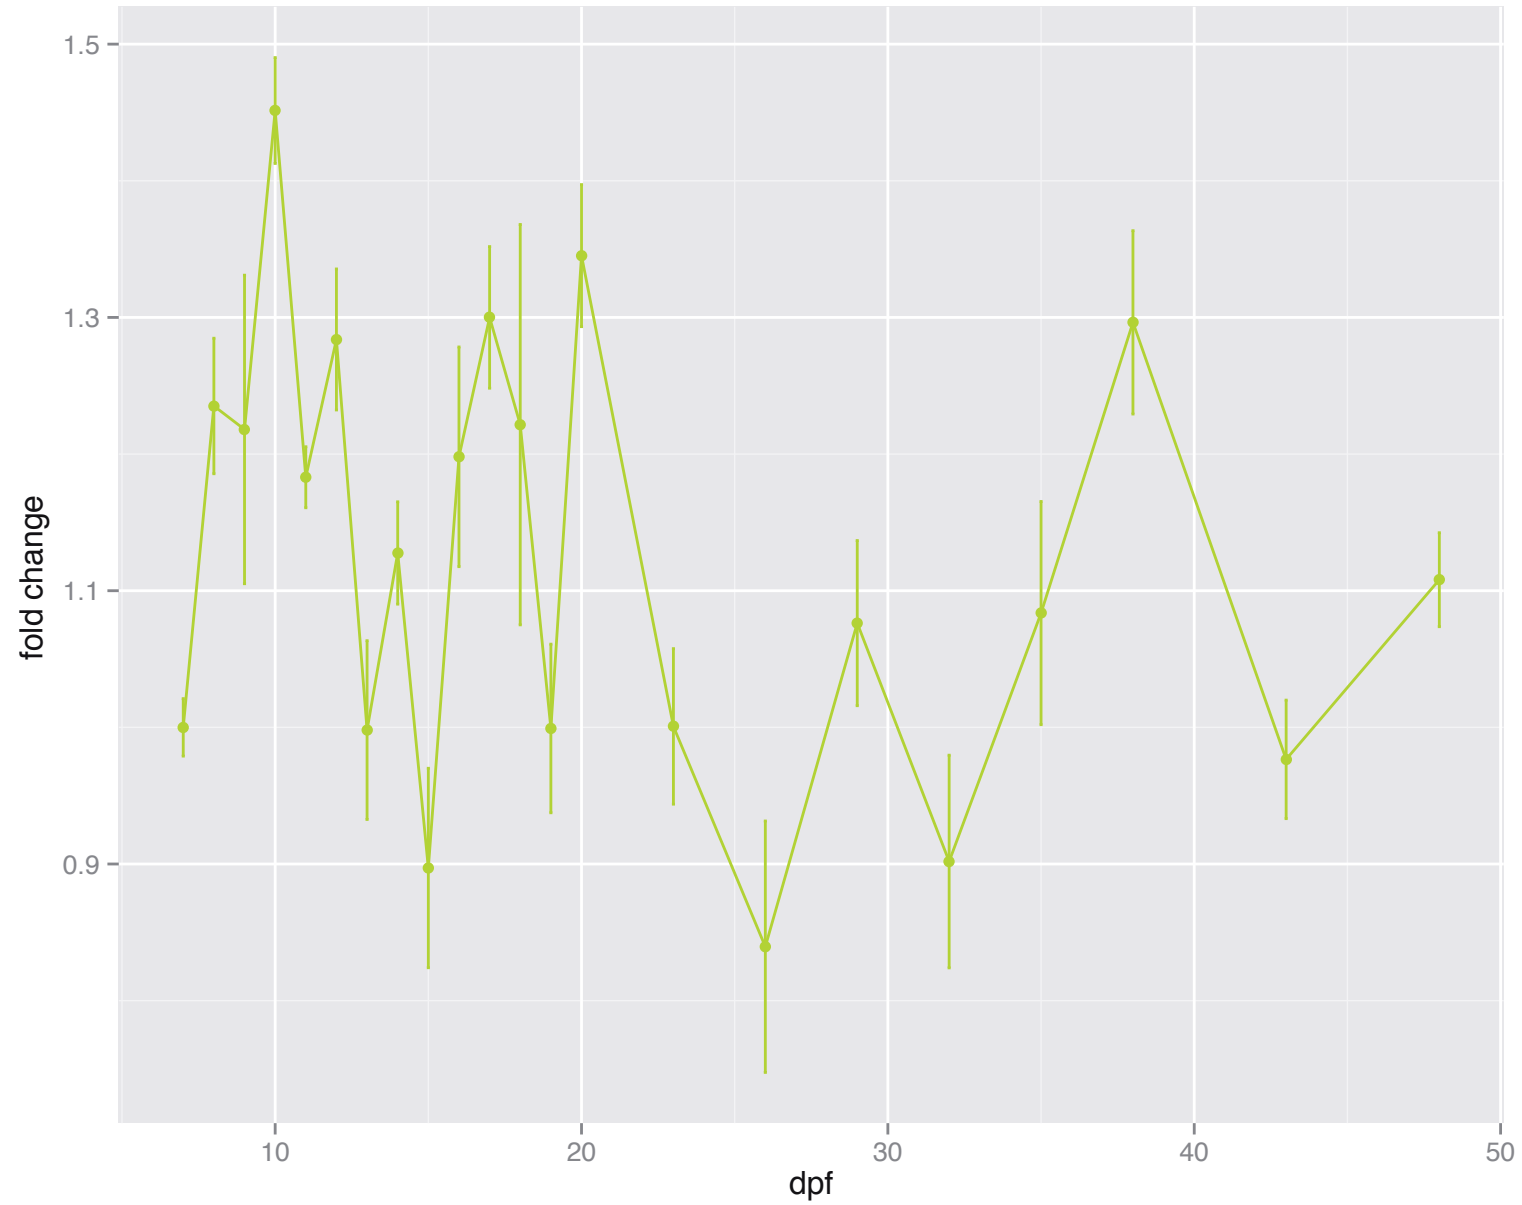

*foxl2B* in heads

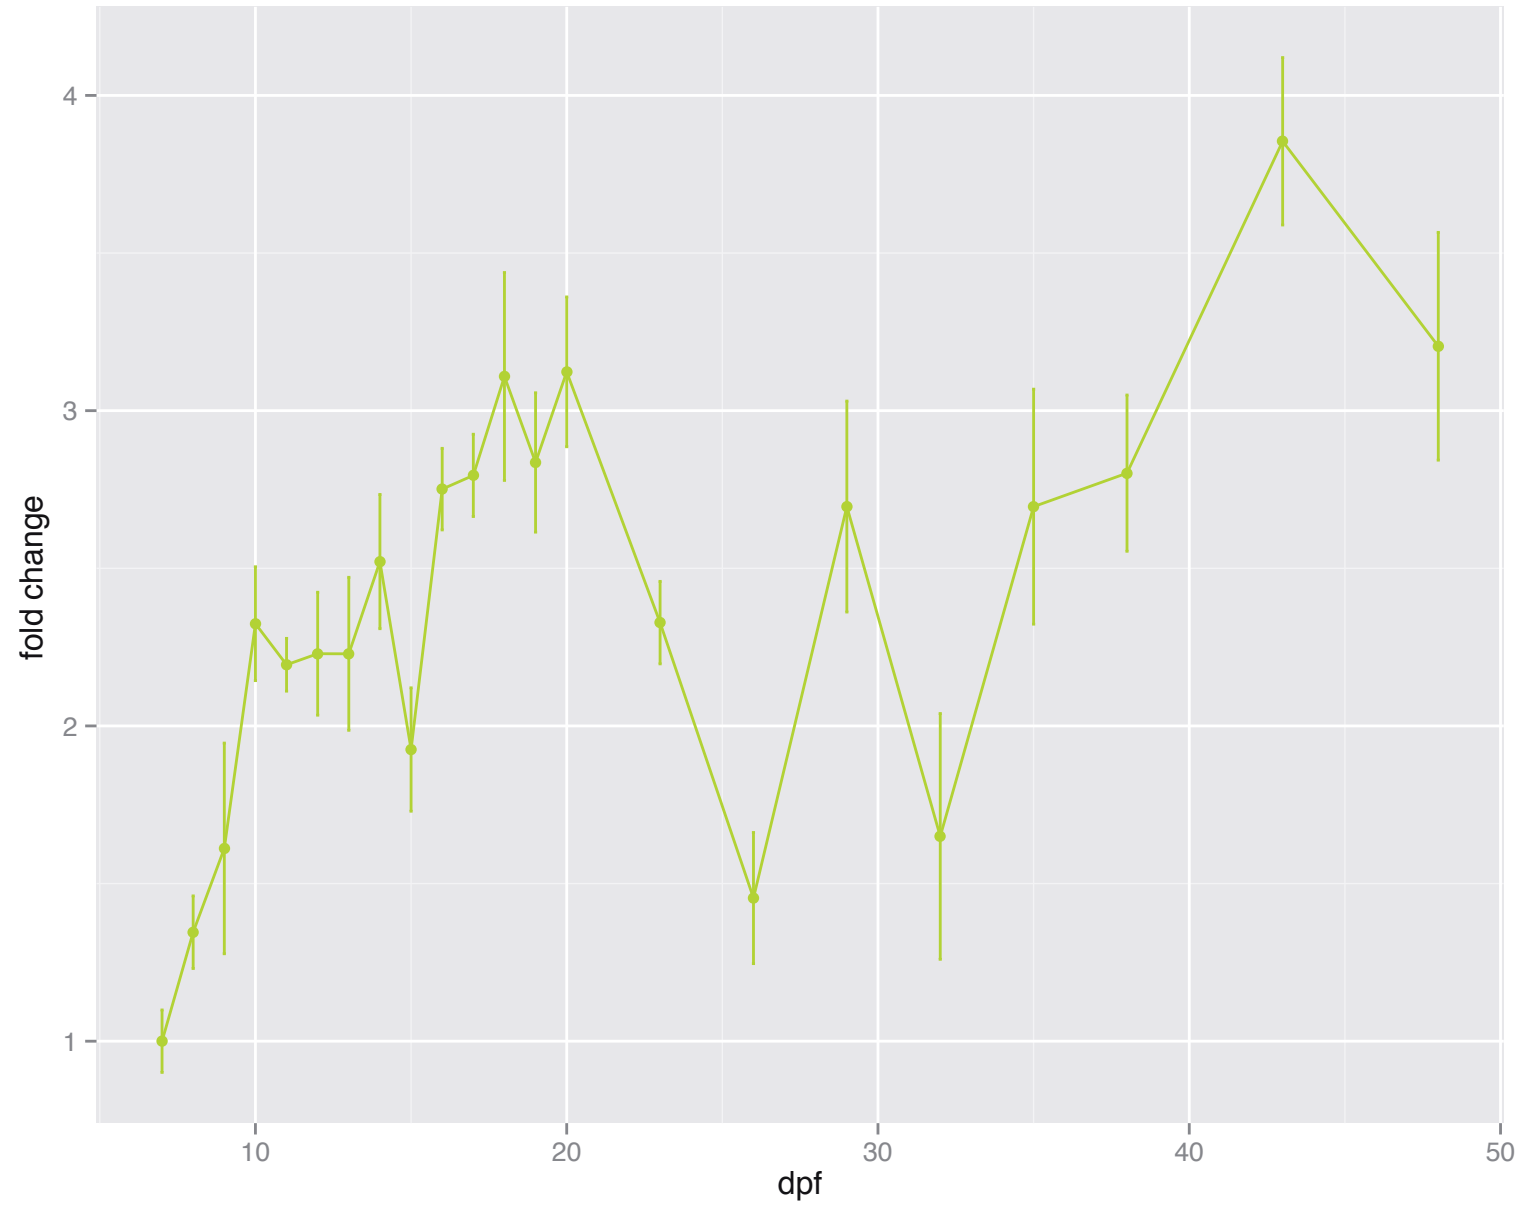

*gata4* in heads

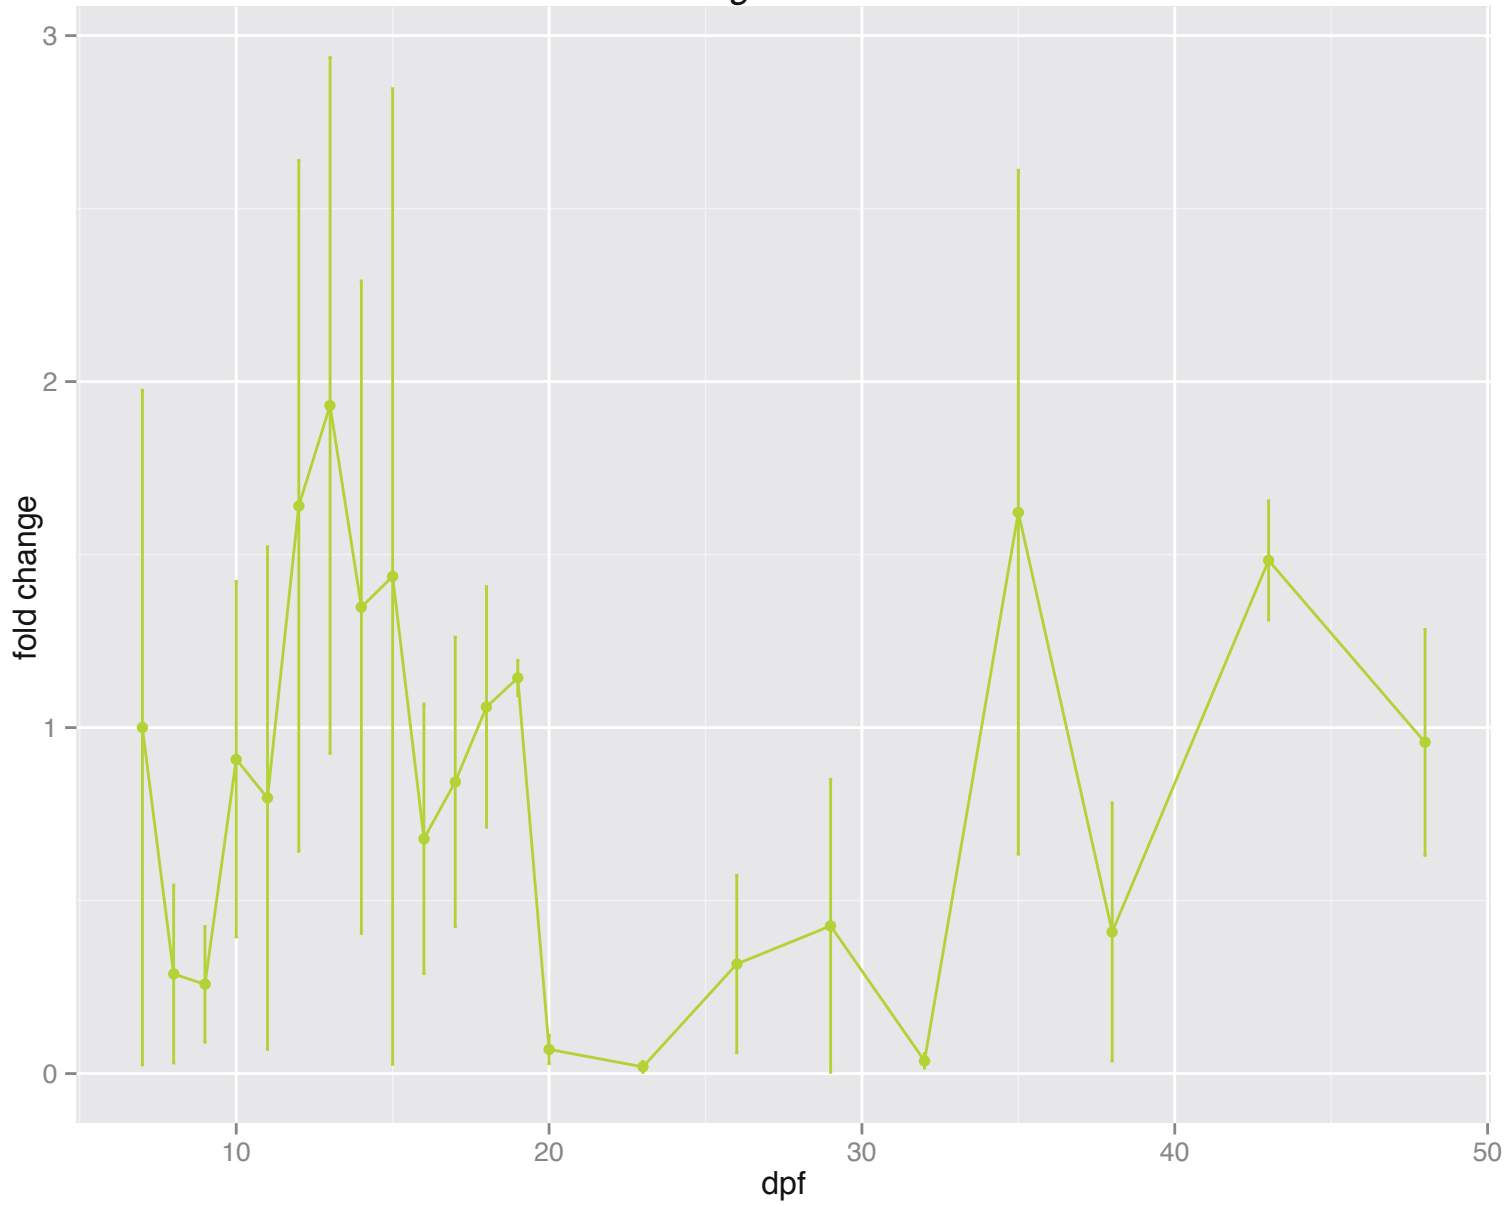

*gsdf* in heads

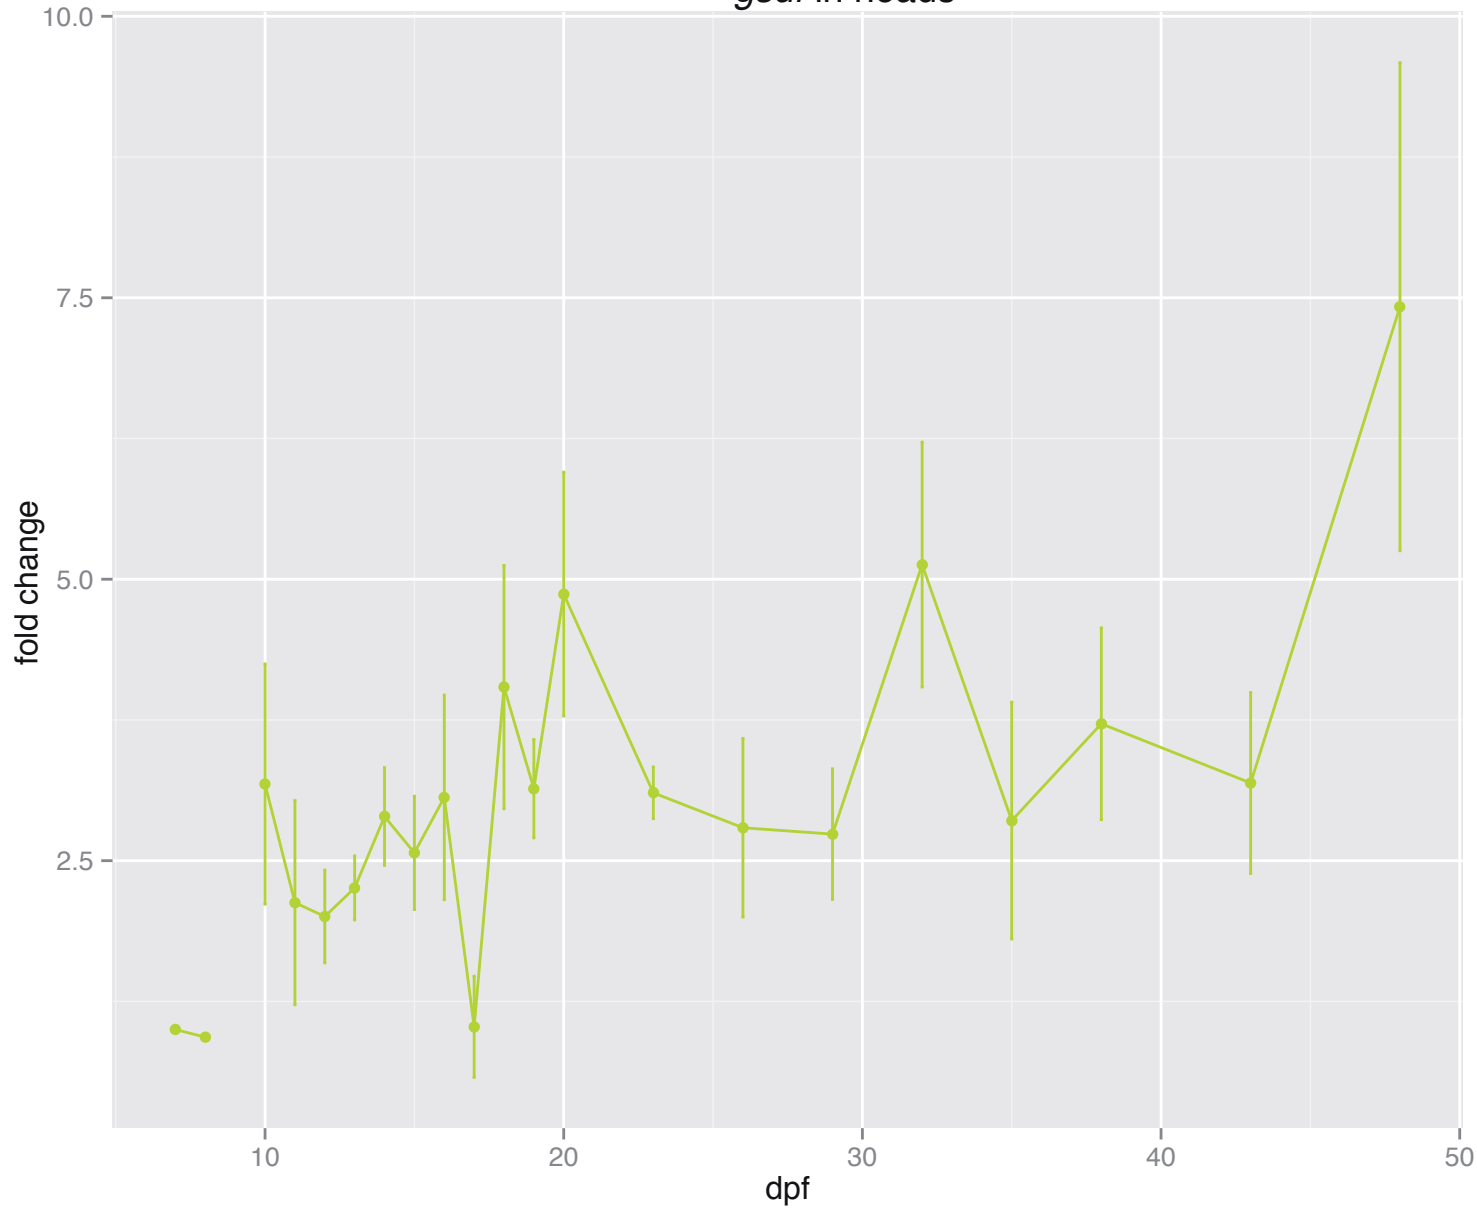

*nanos1A* in heads

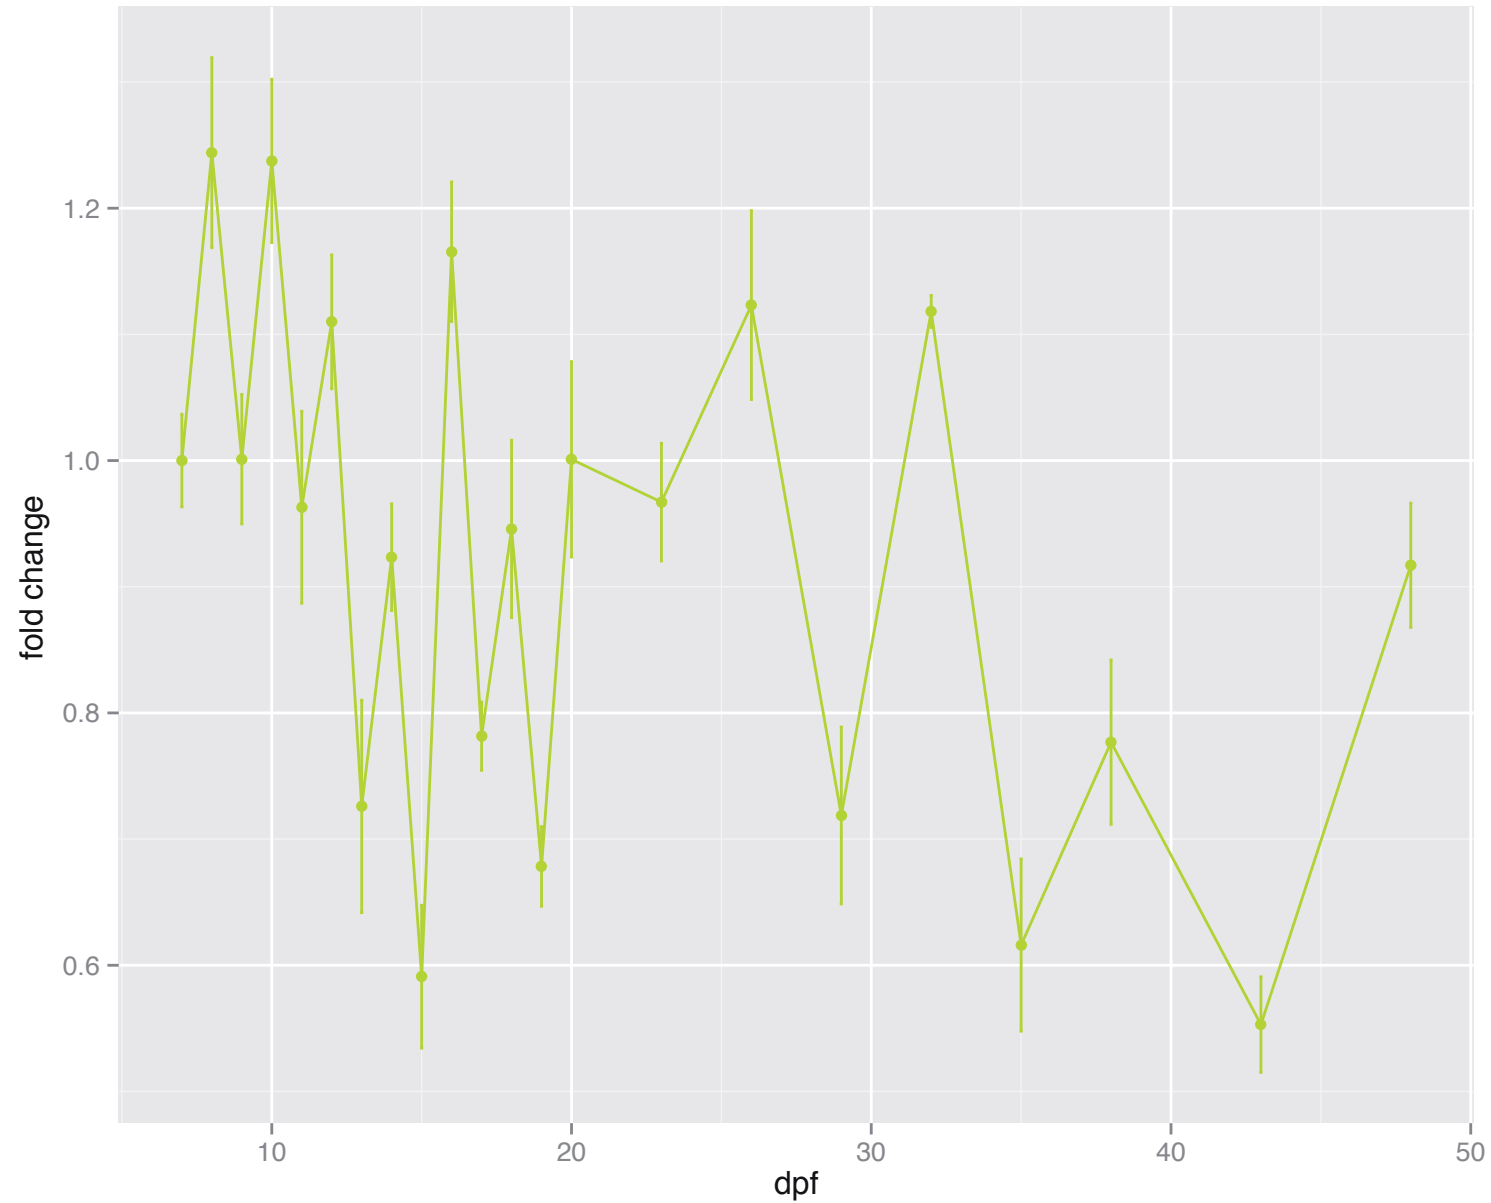

*nanos1B* in heads

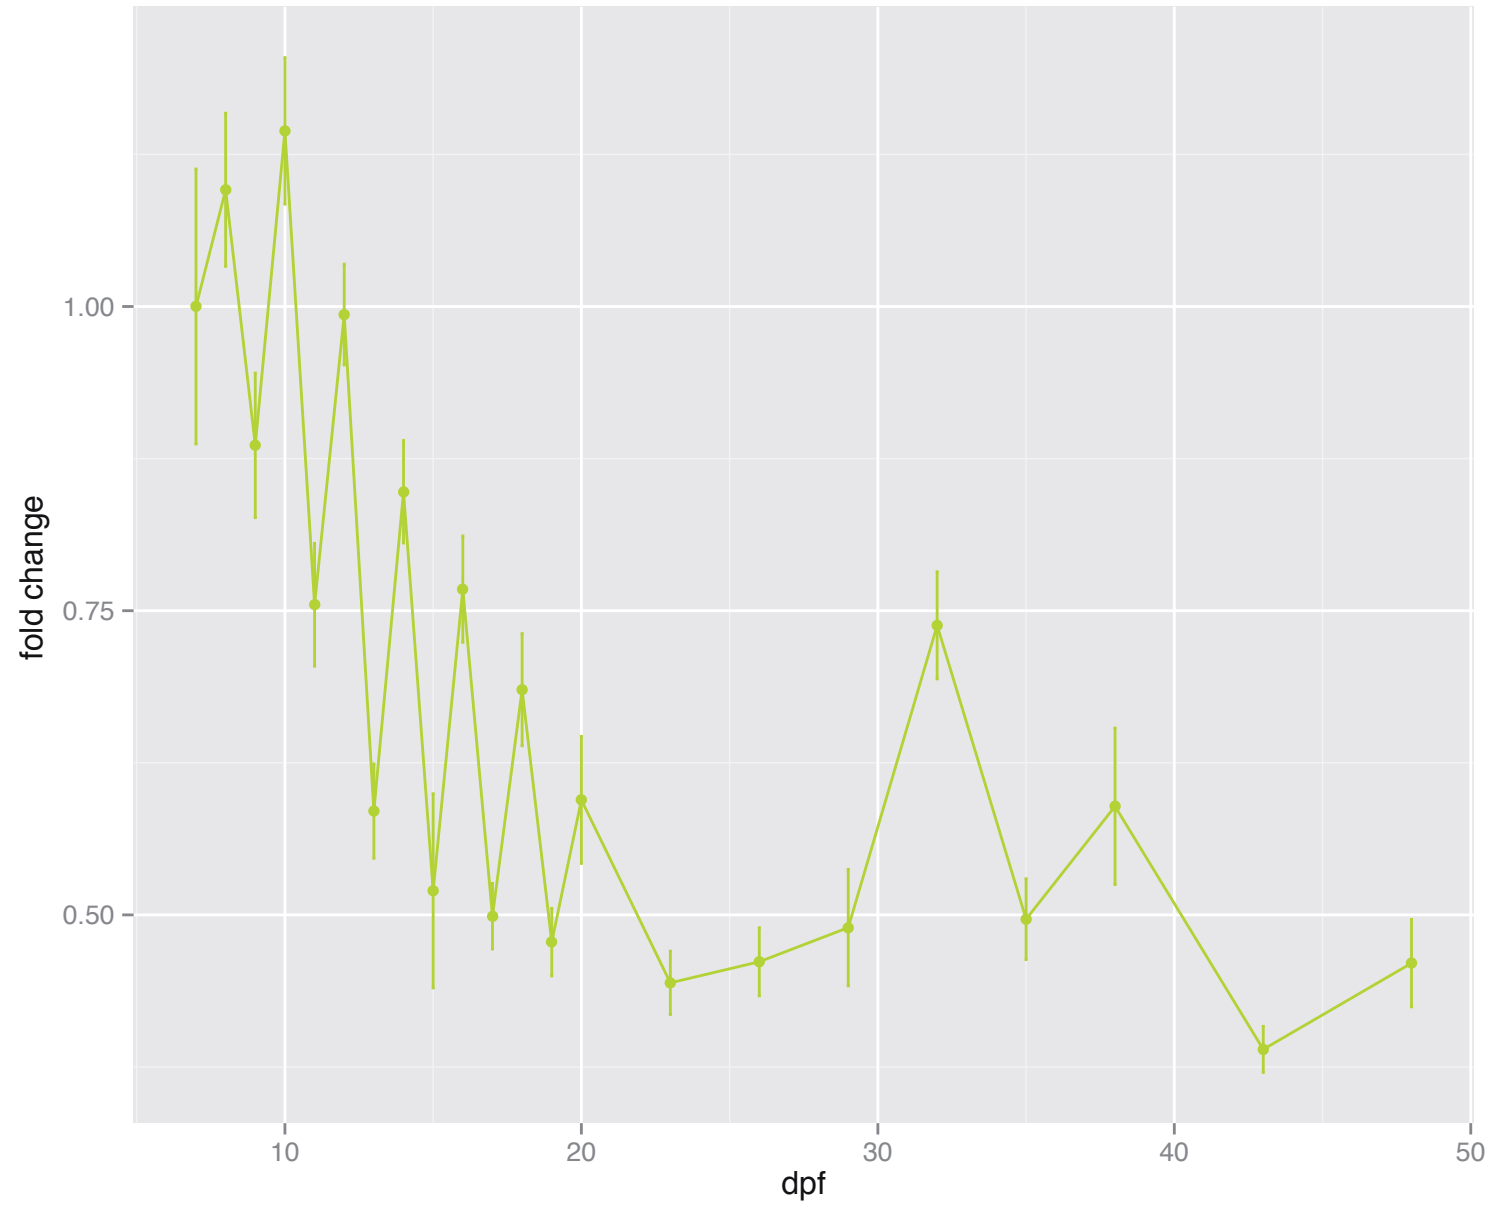

*nr5a2* in heads

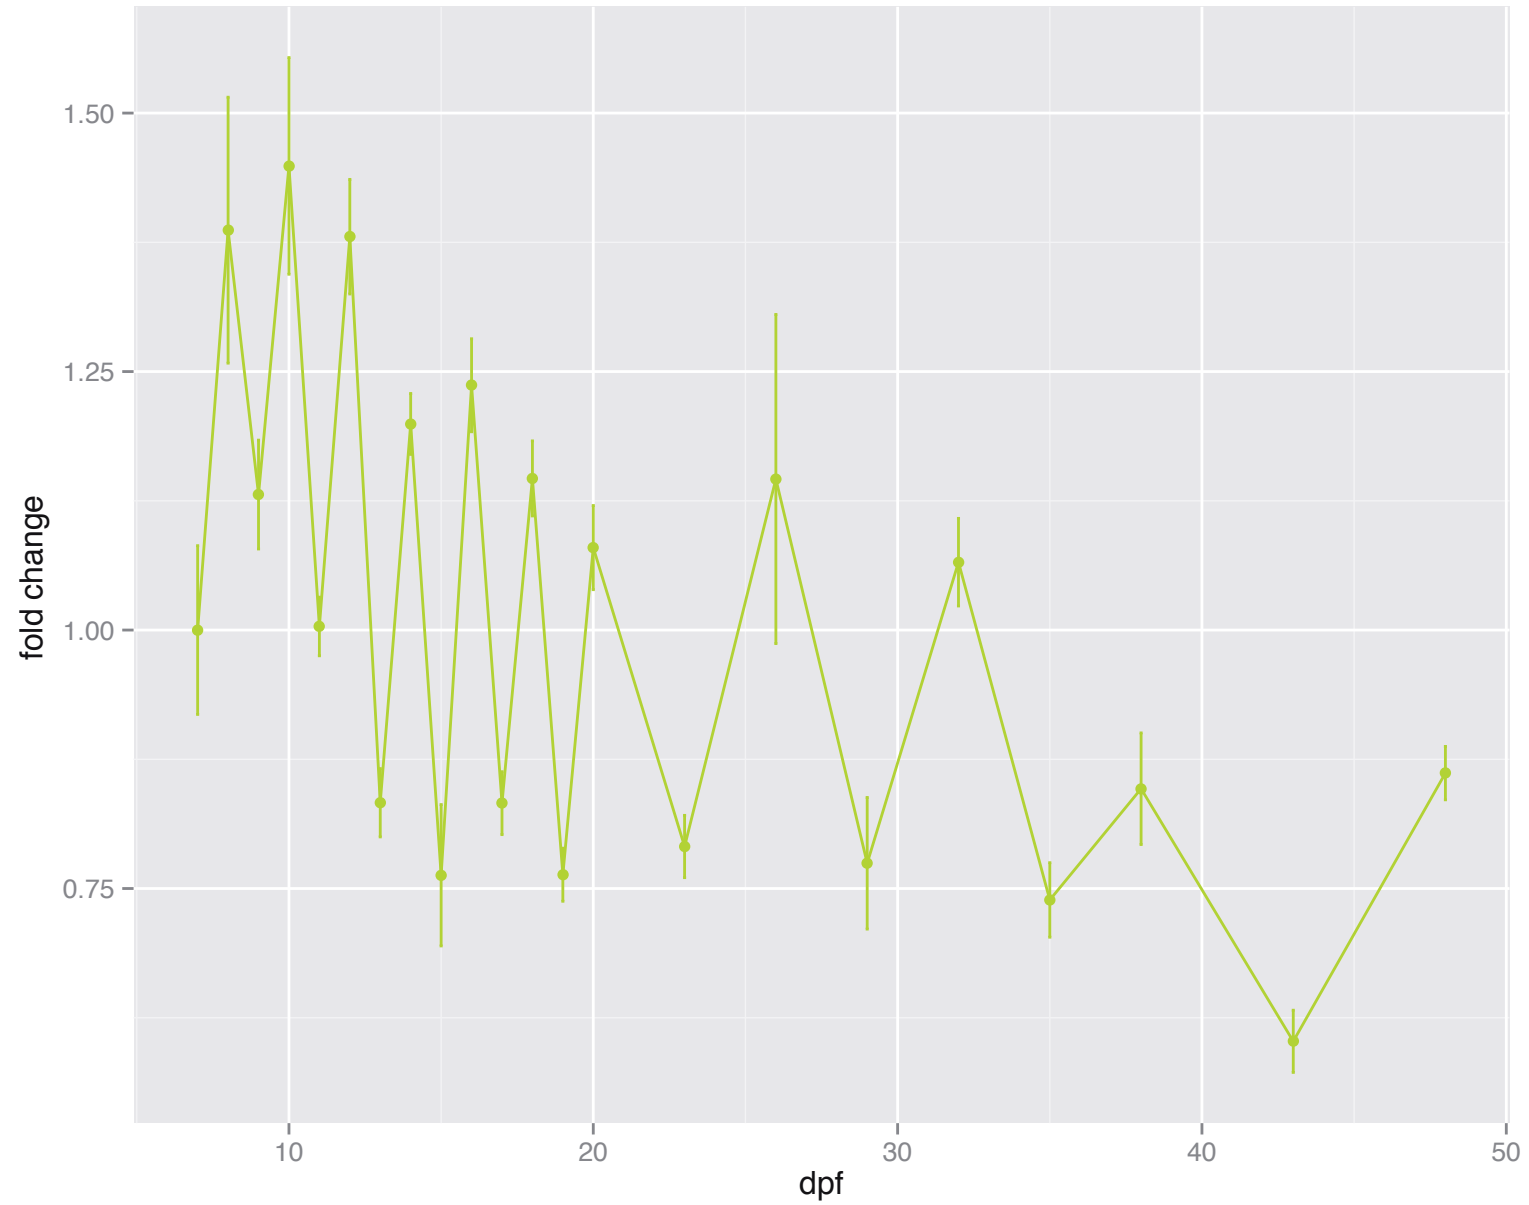

*nr5a5* in heads

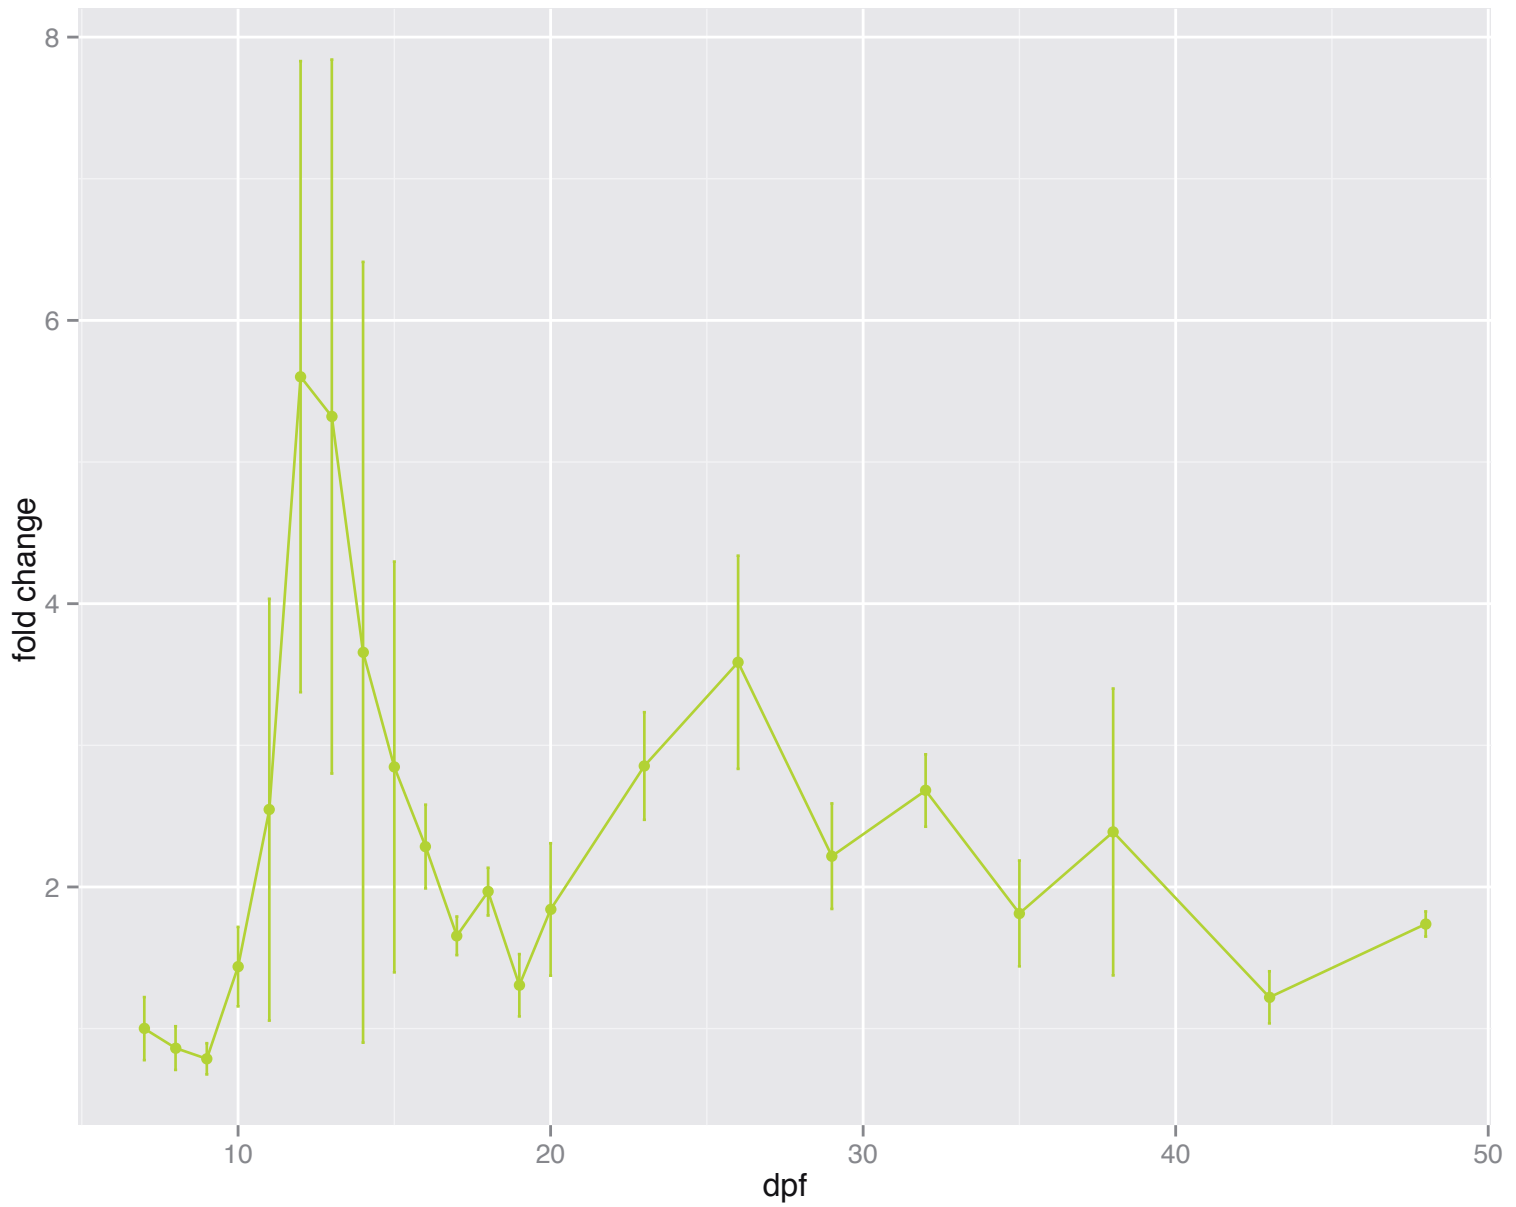



*rspo1* in heads

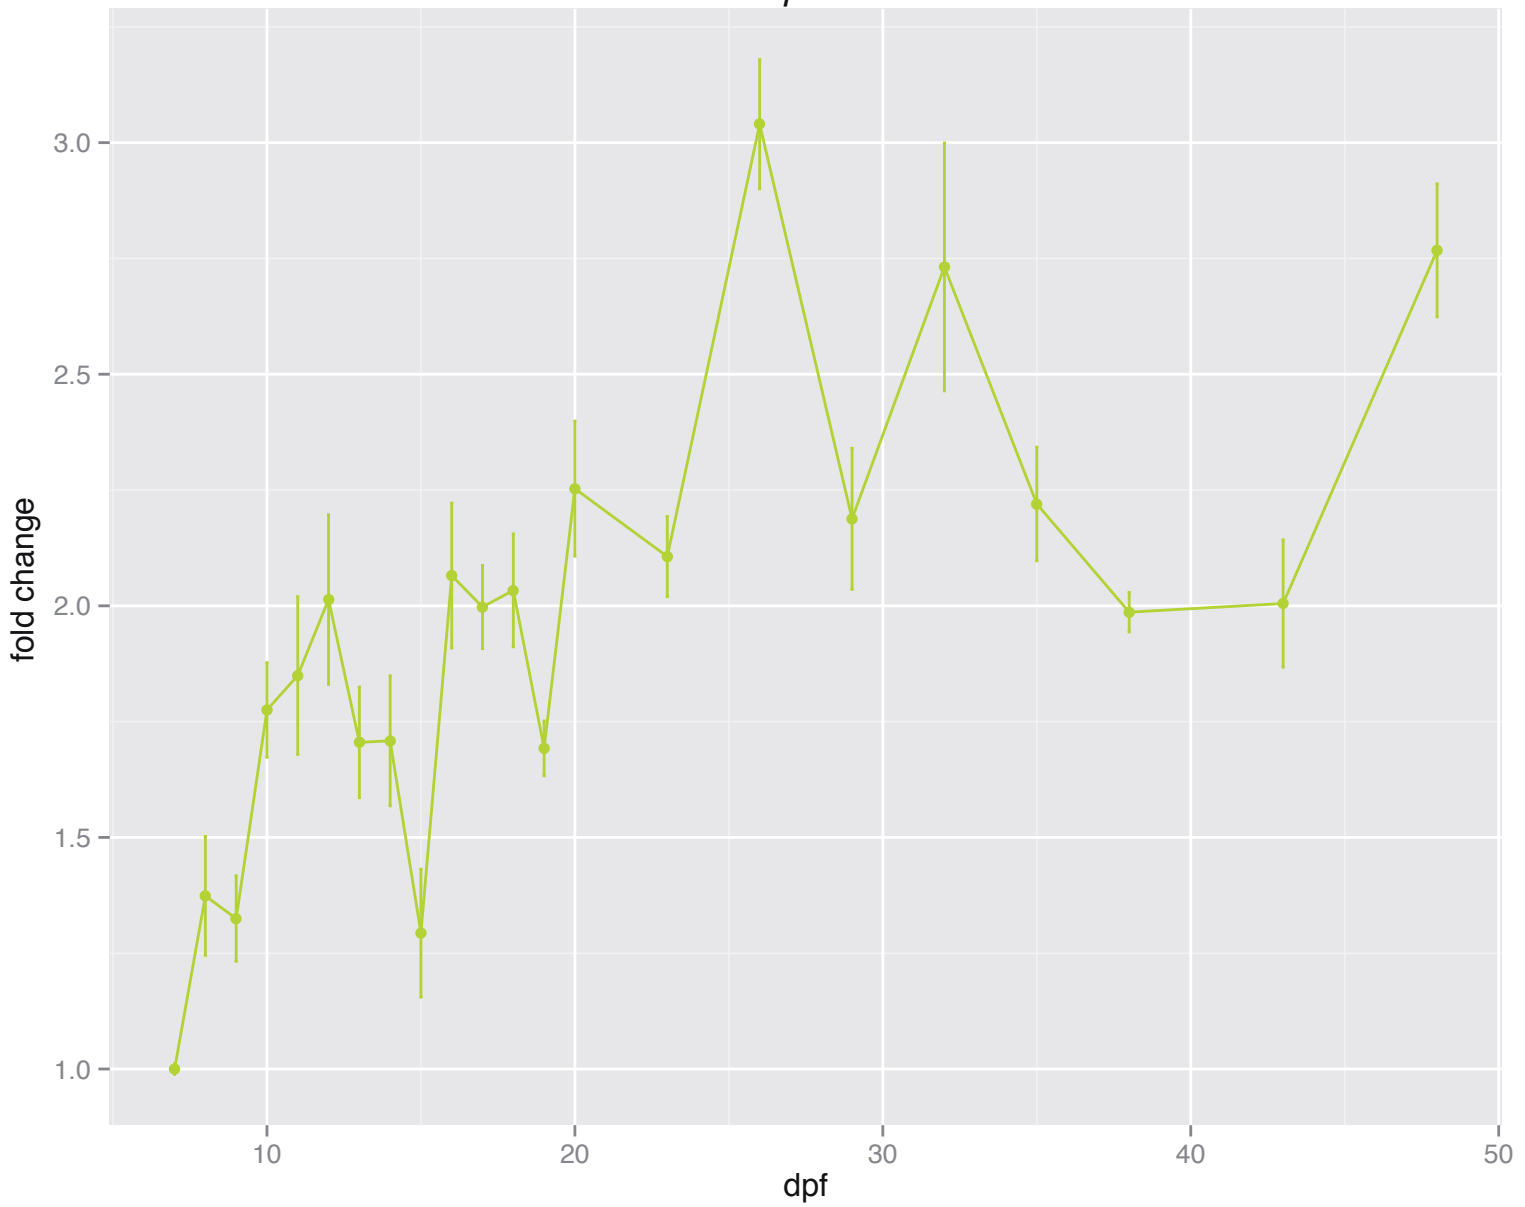

*sf-1* in heads

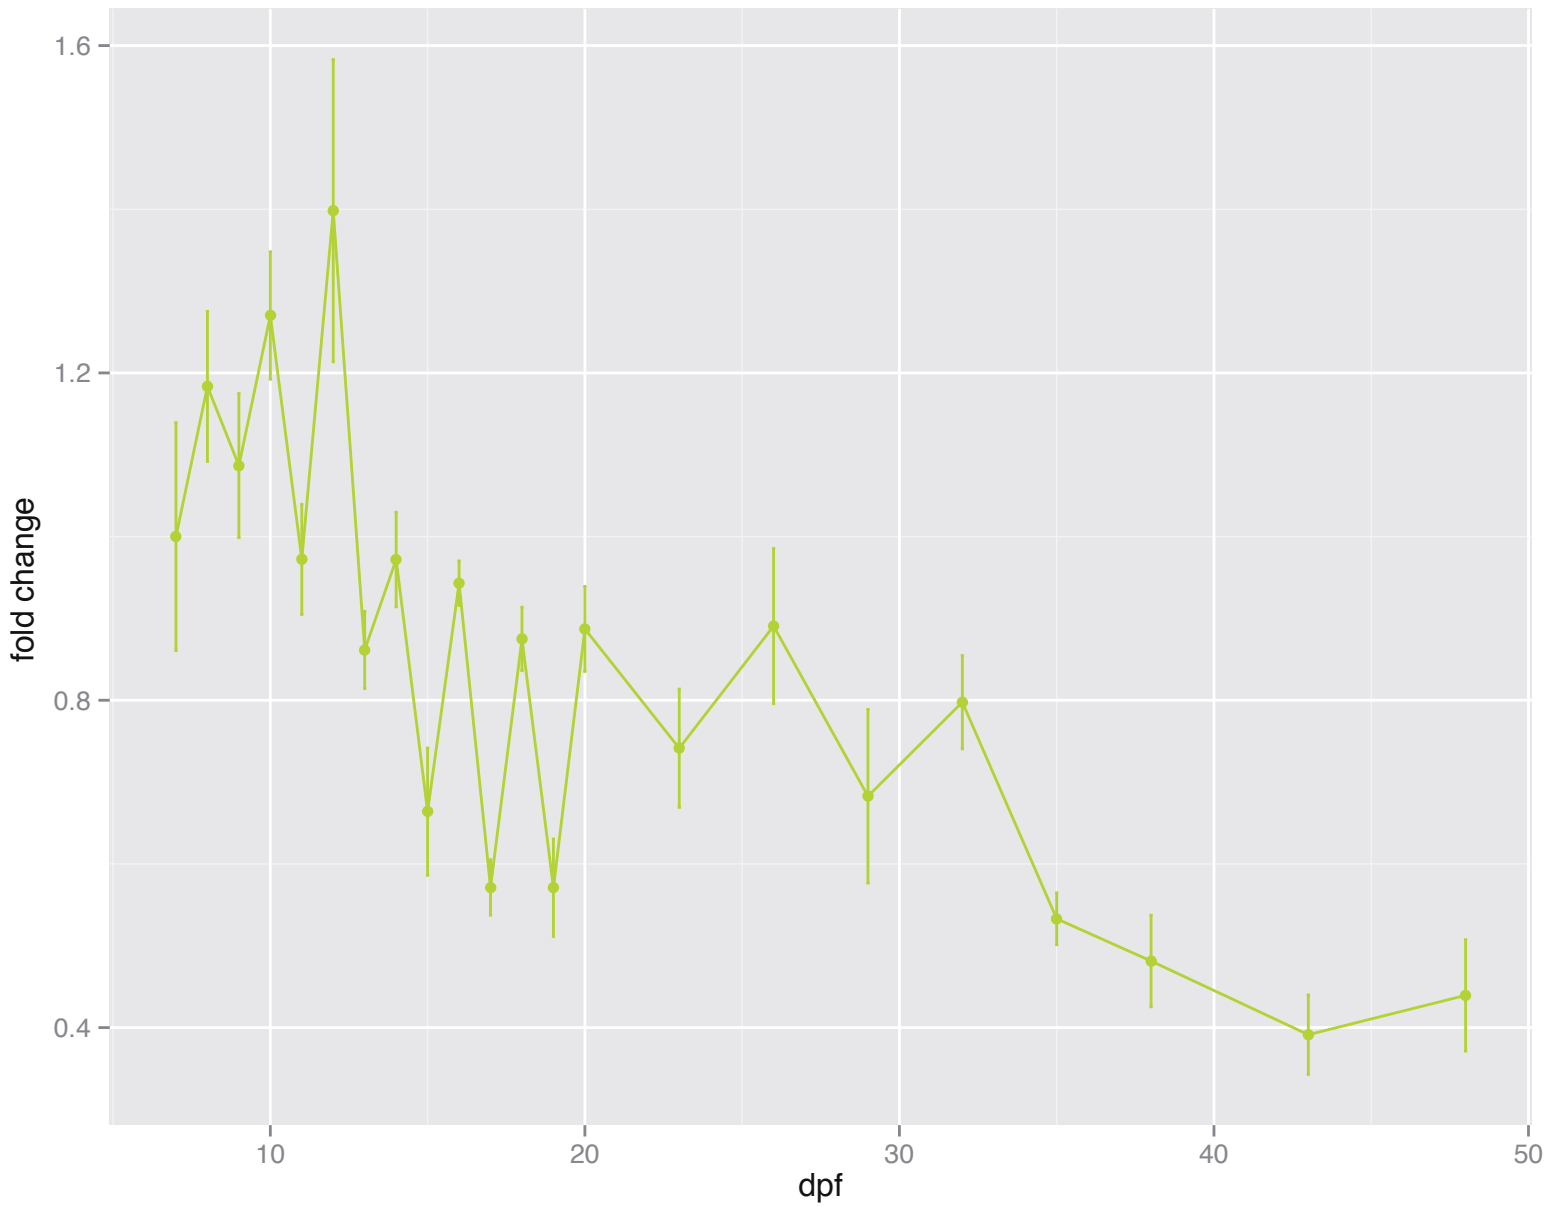

sox9A in heads

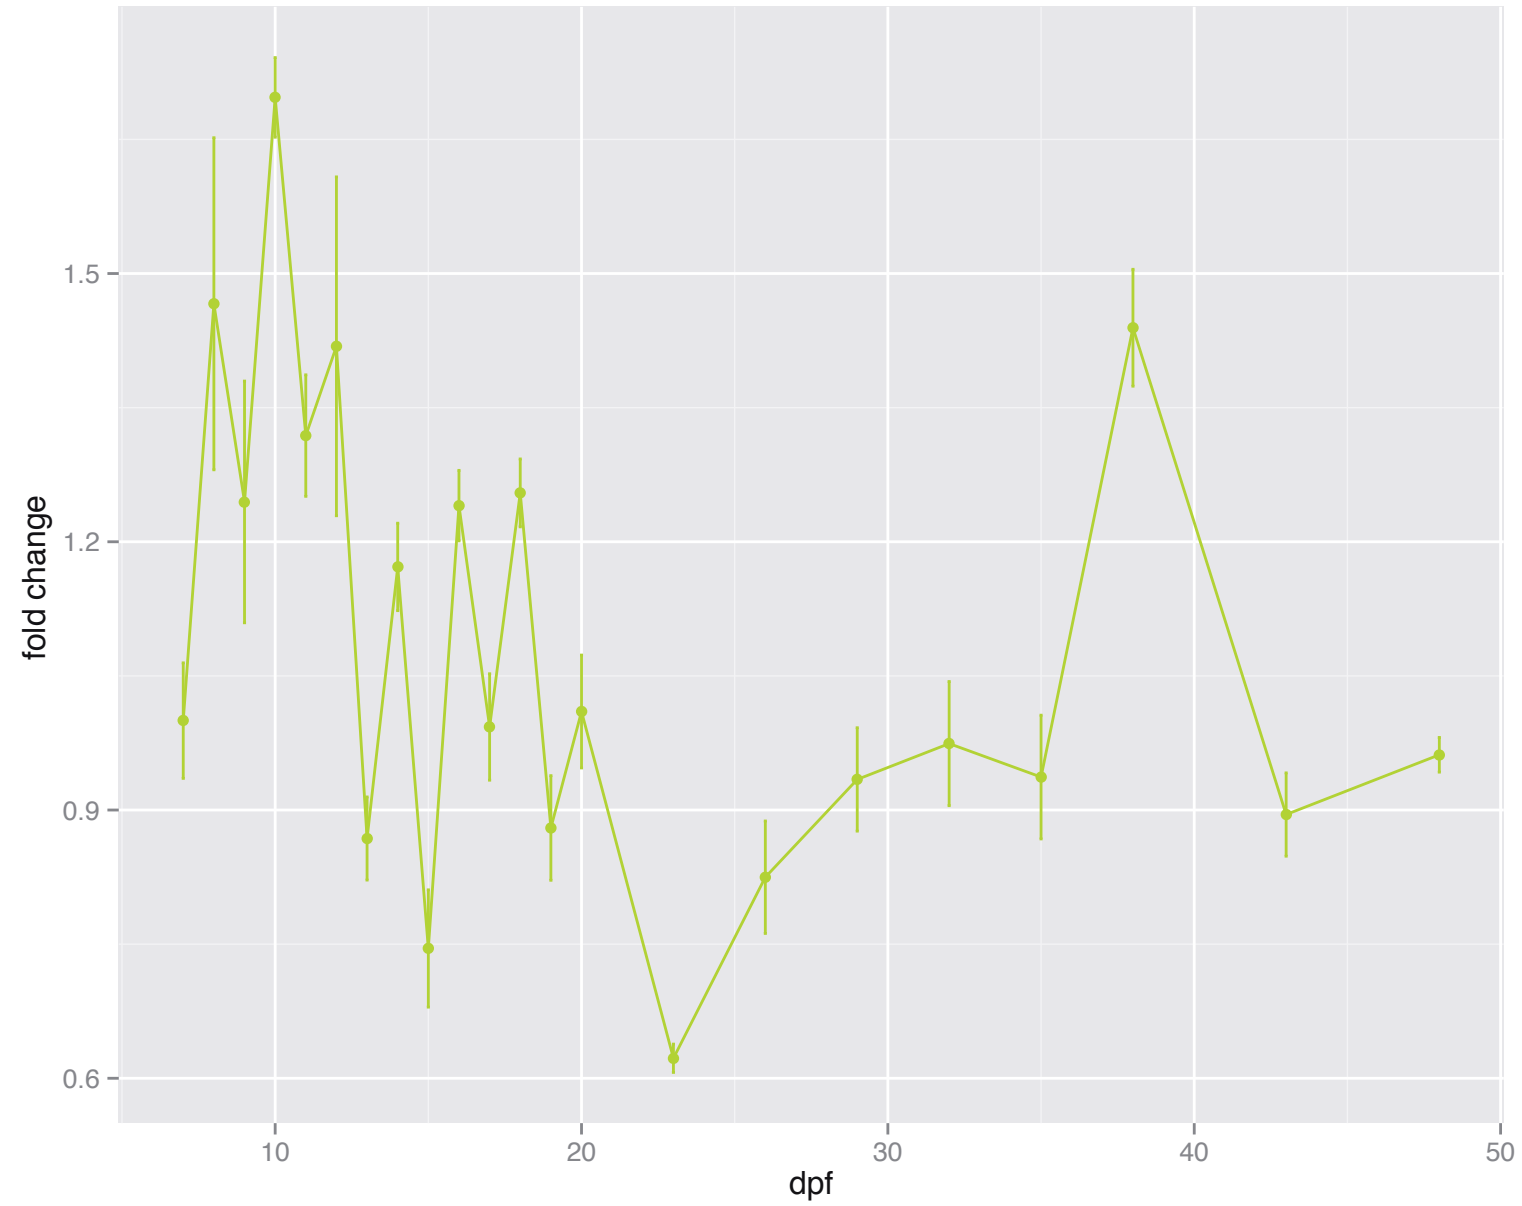

*sox9B* in heads

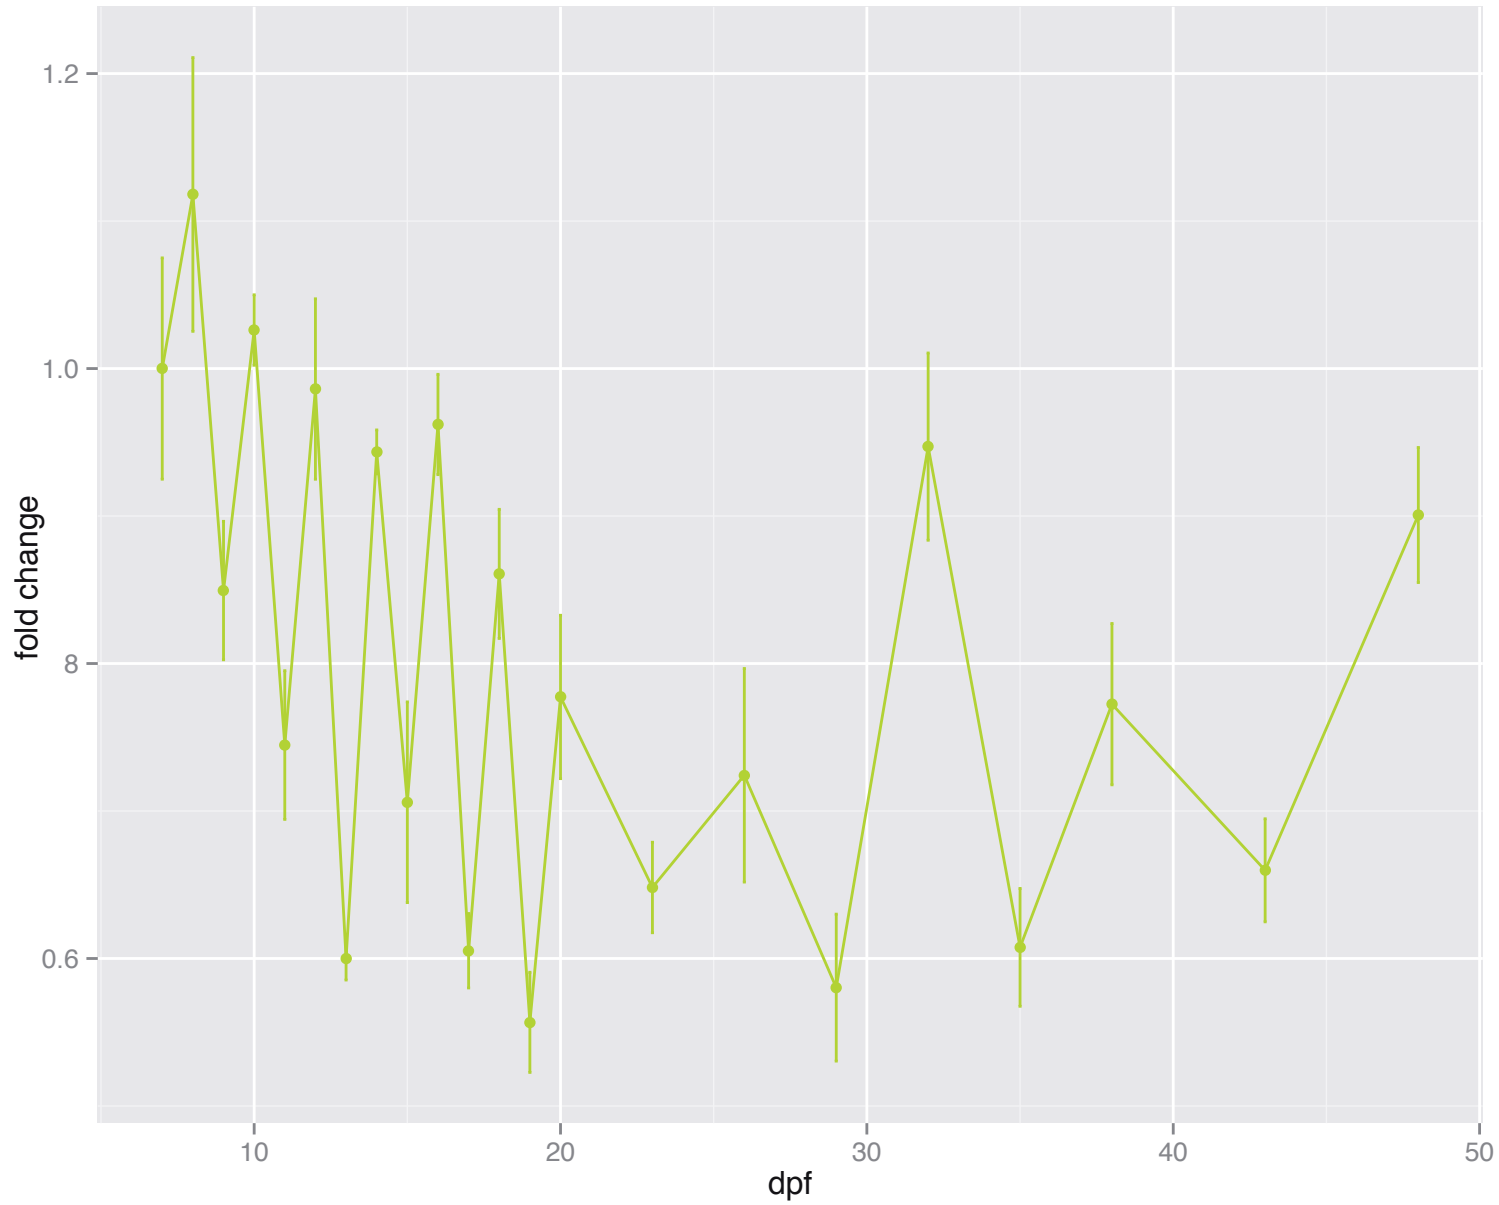

*wnt4A* in heads

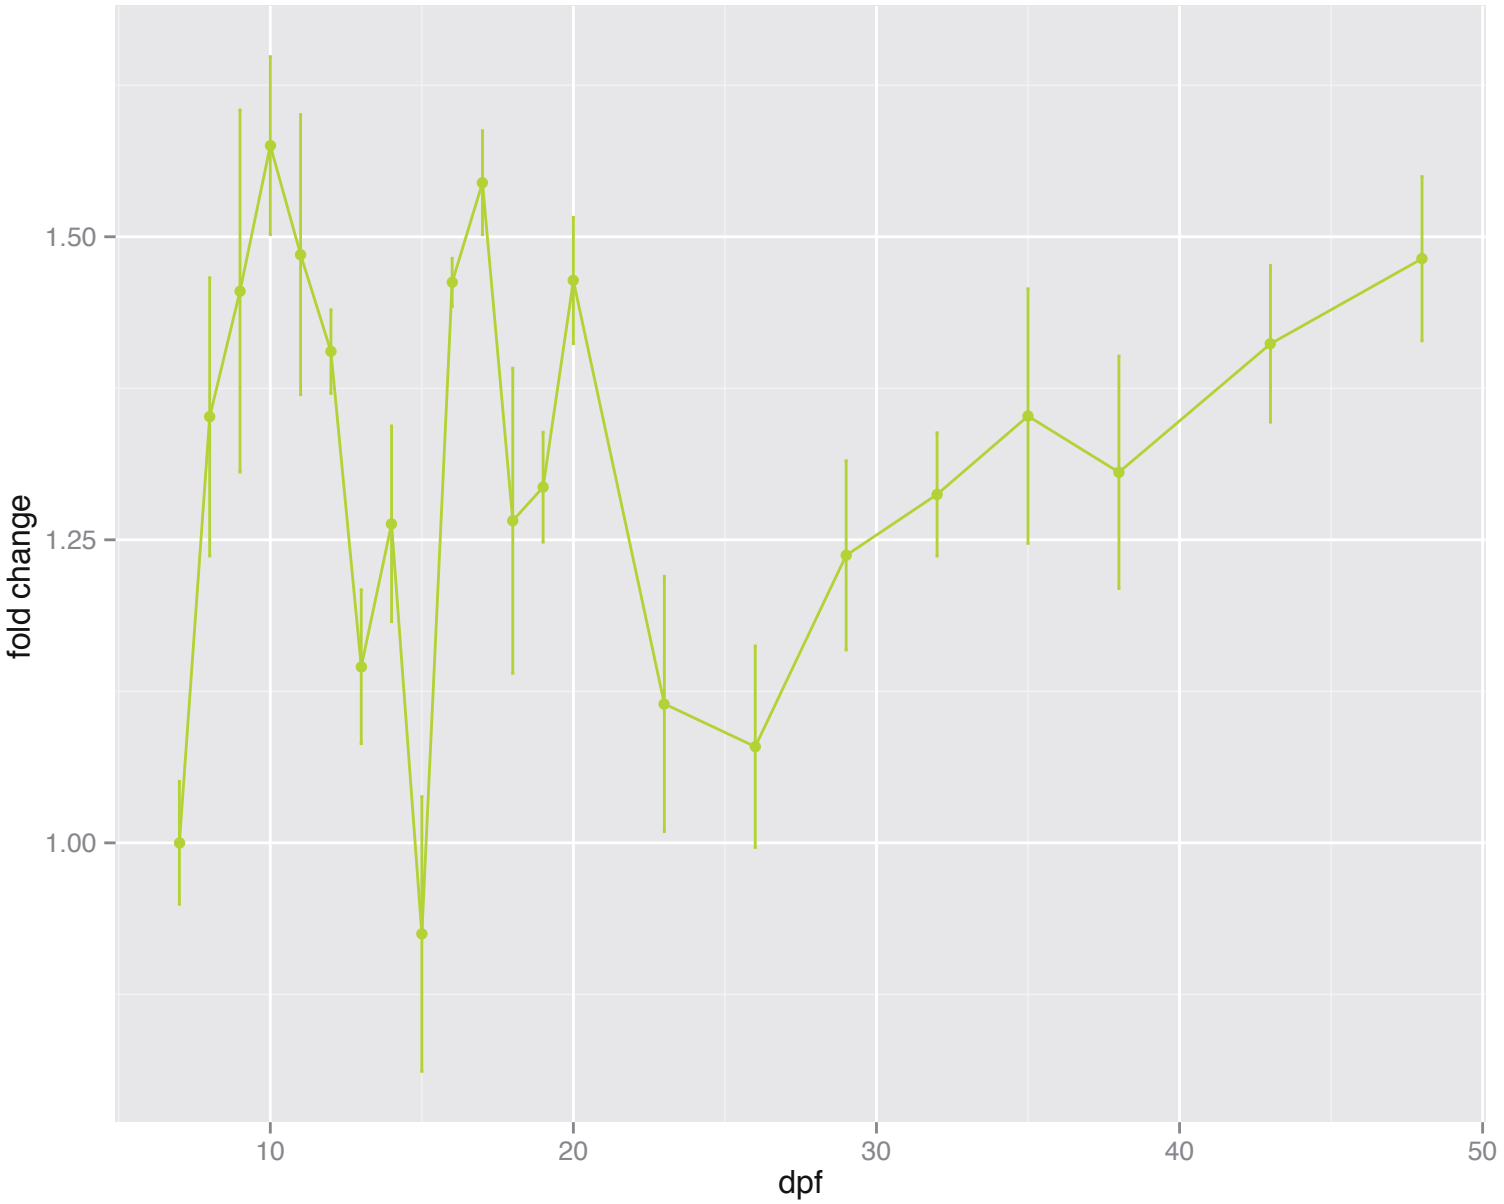

*wnt4B* in heads

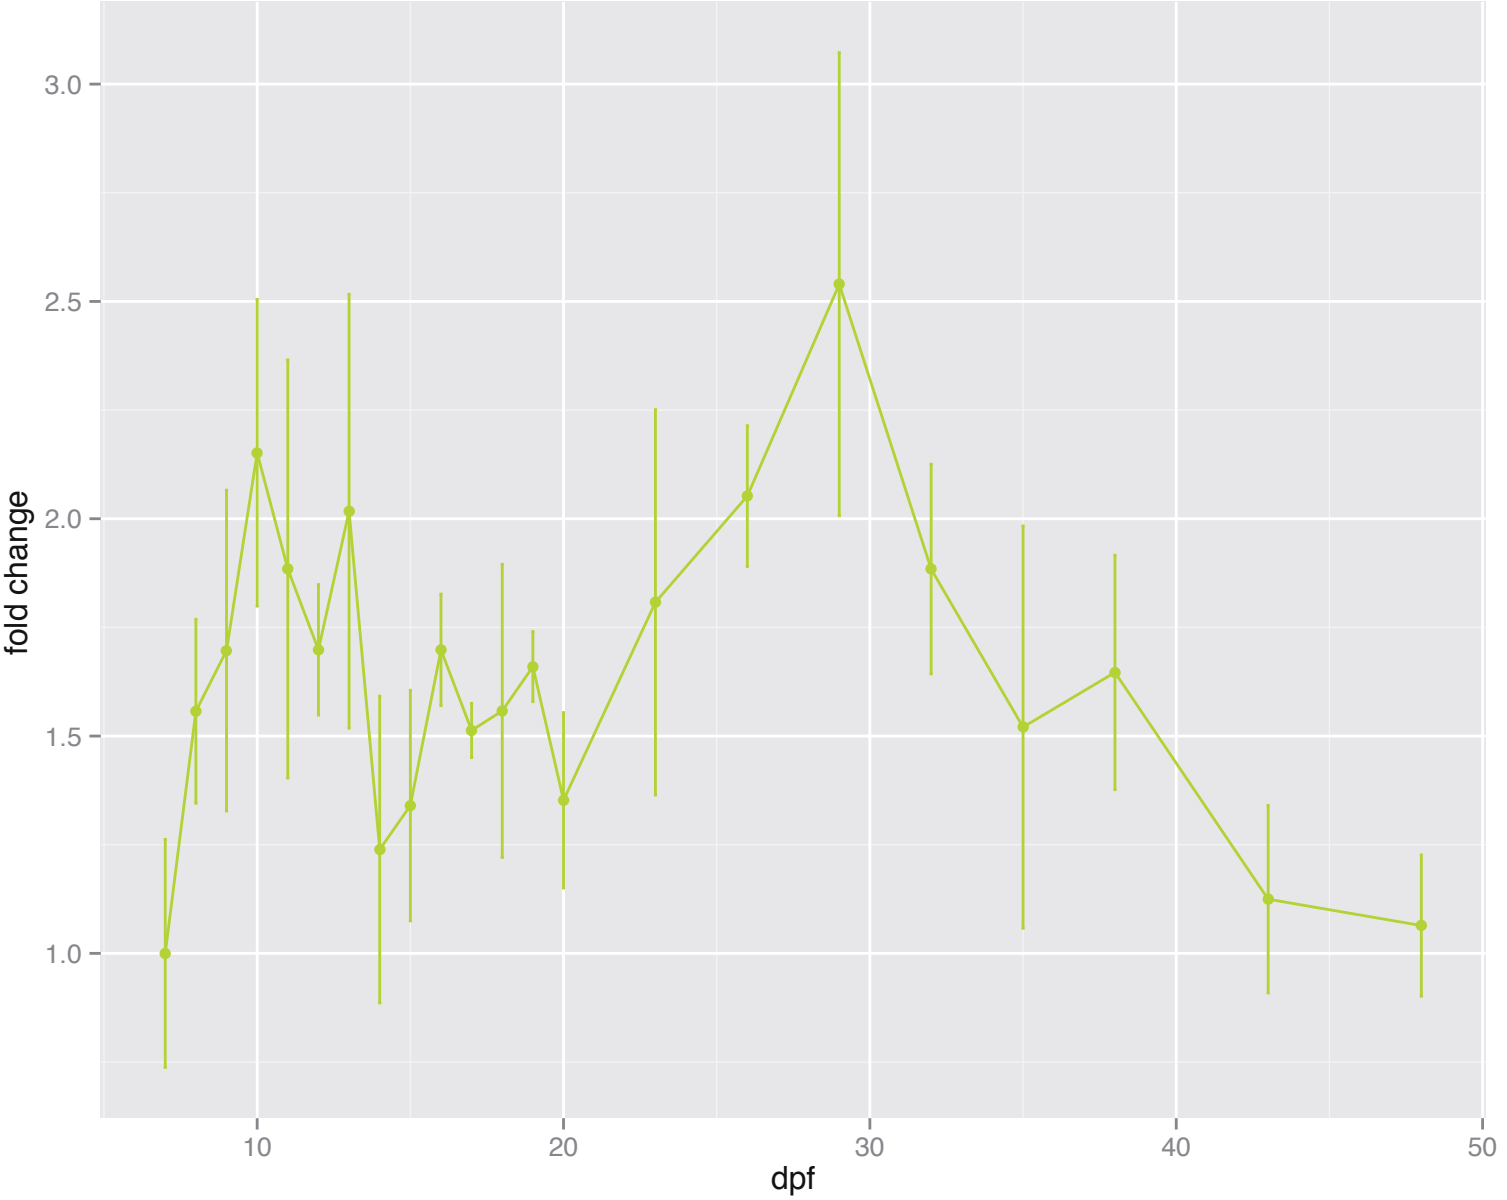

*wt1A* in heads

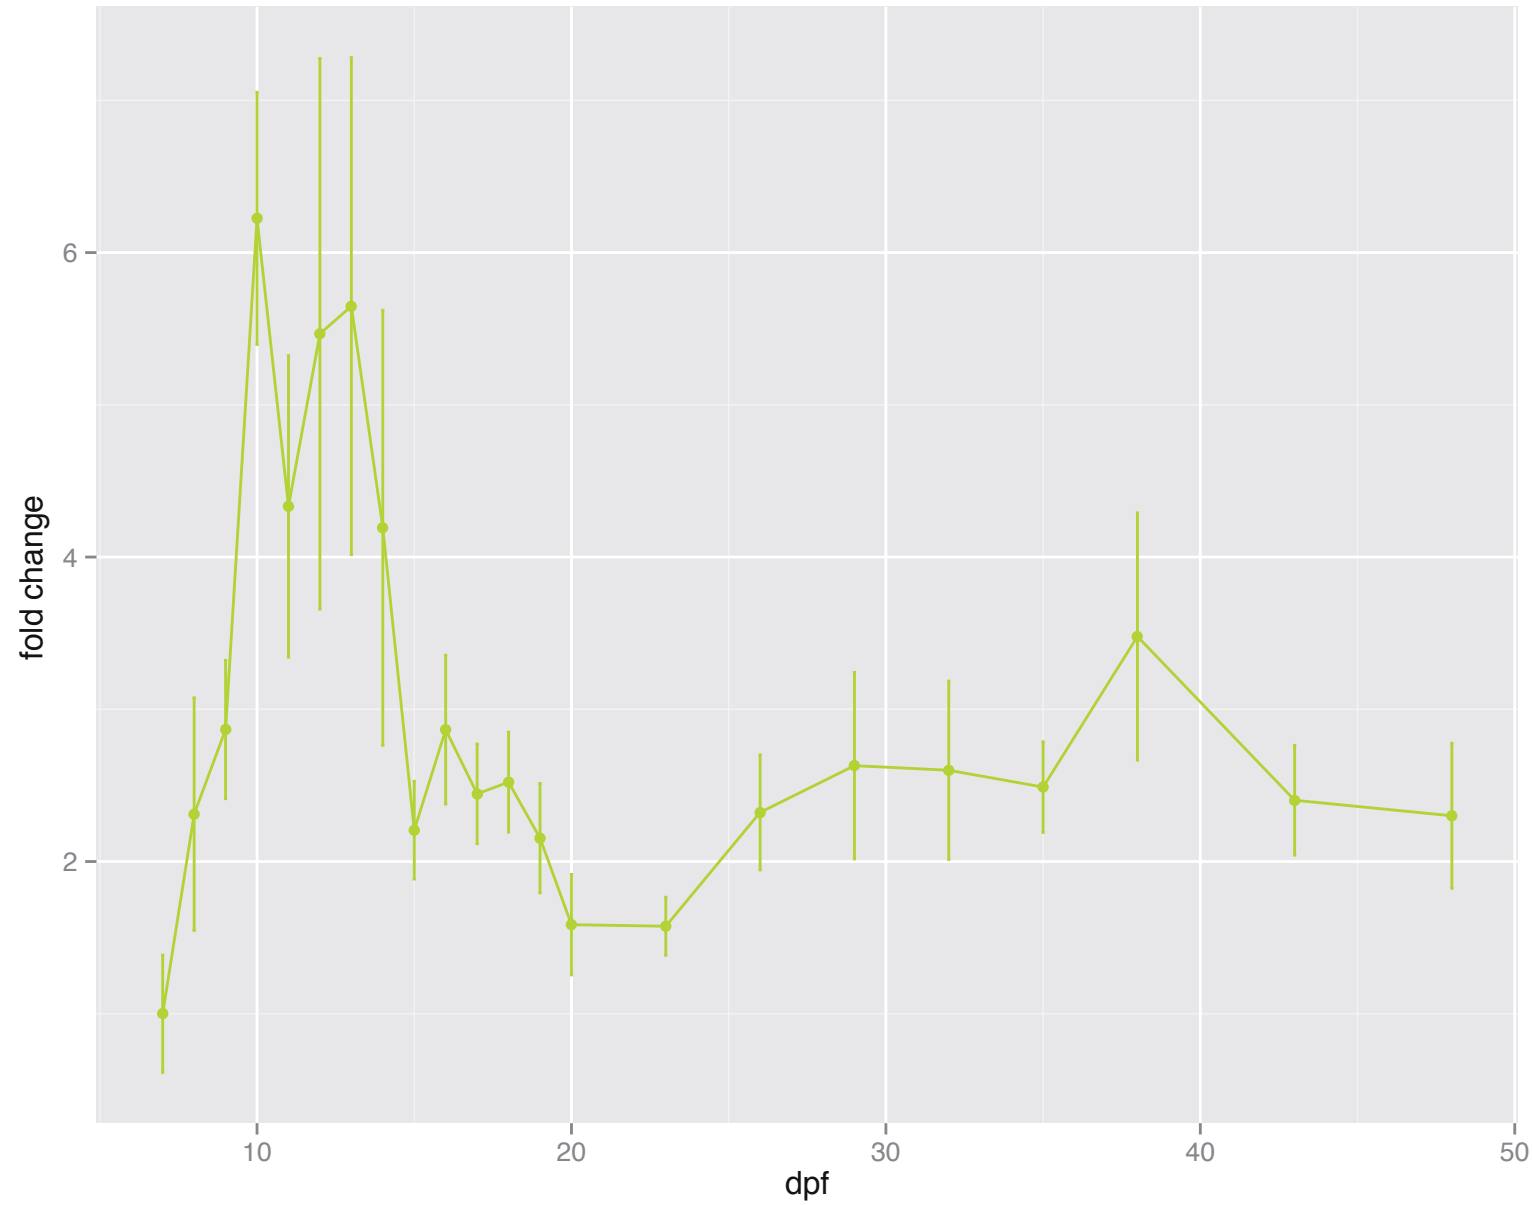

*wt1B* in heads

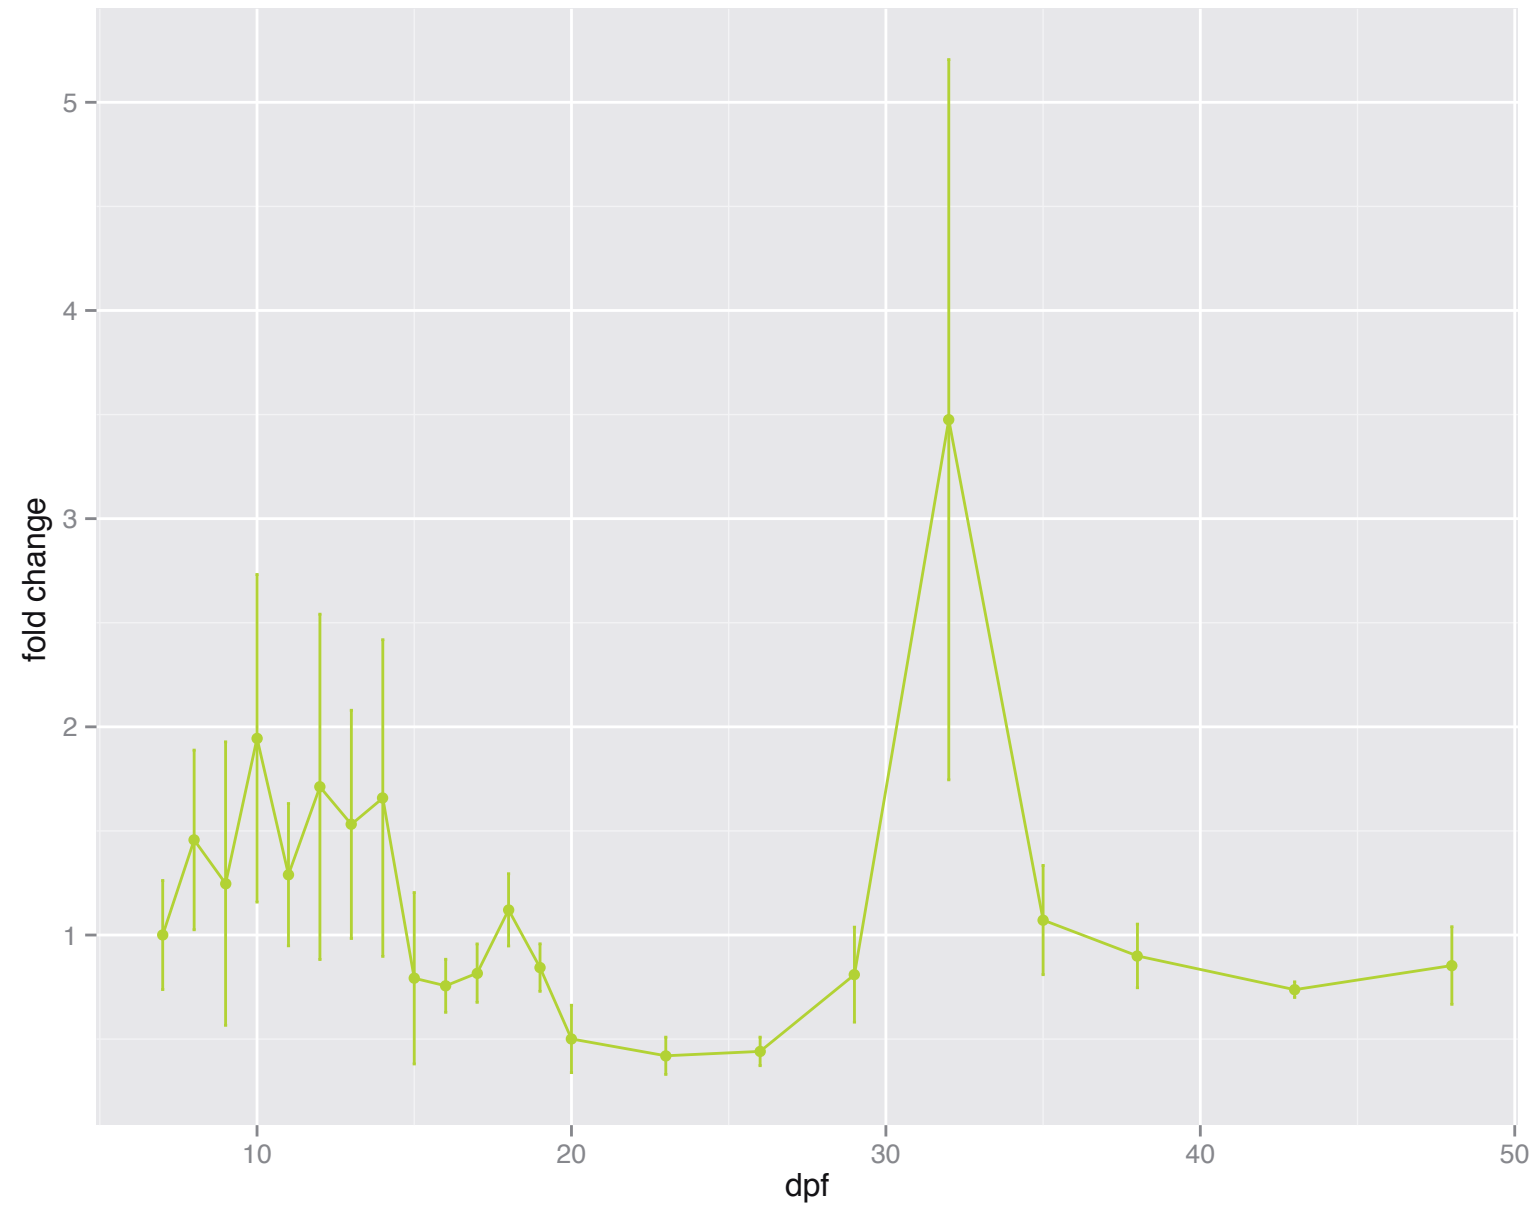



*ctnnb1A* in trunks

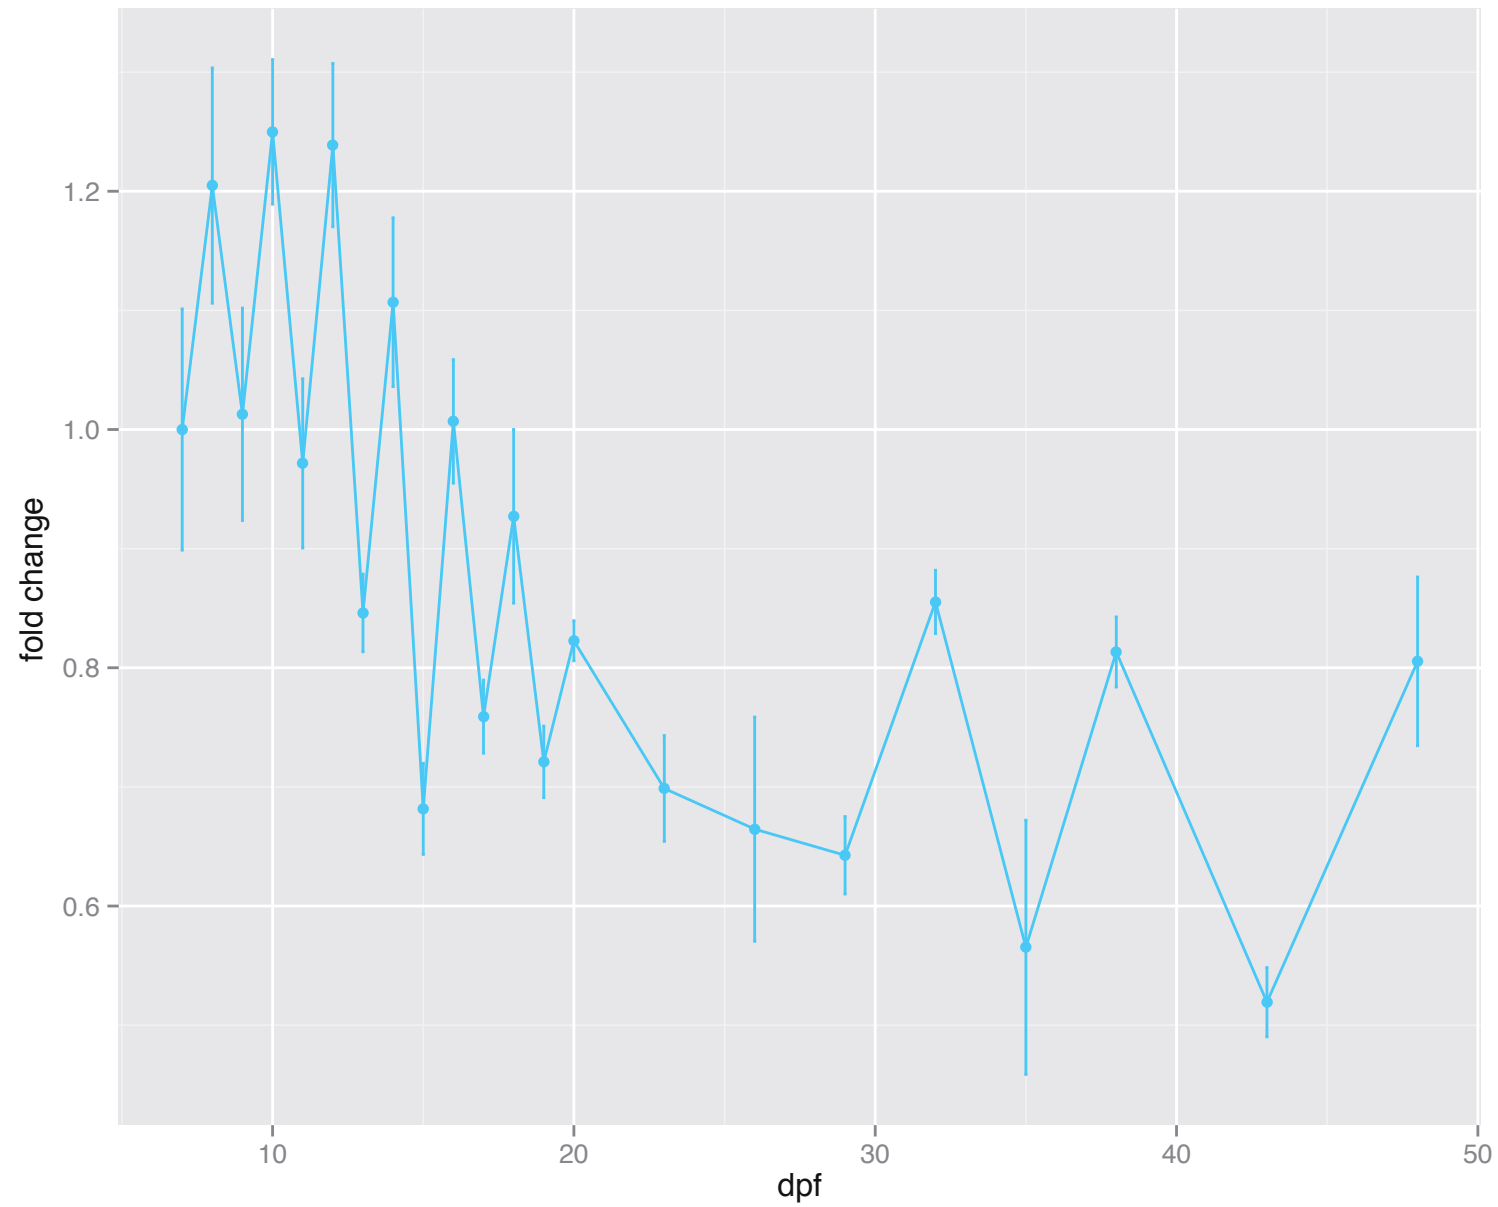

*ctnnb1B* in trunks

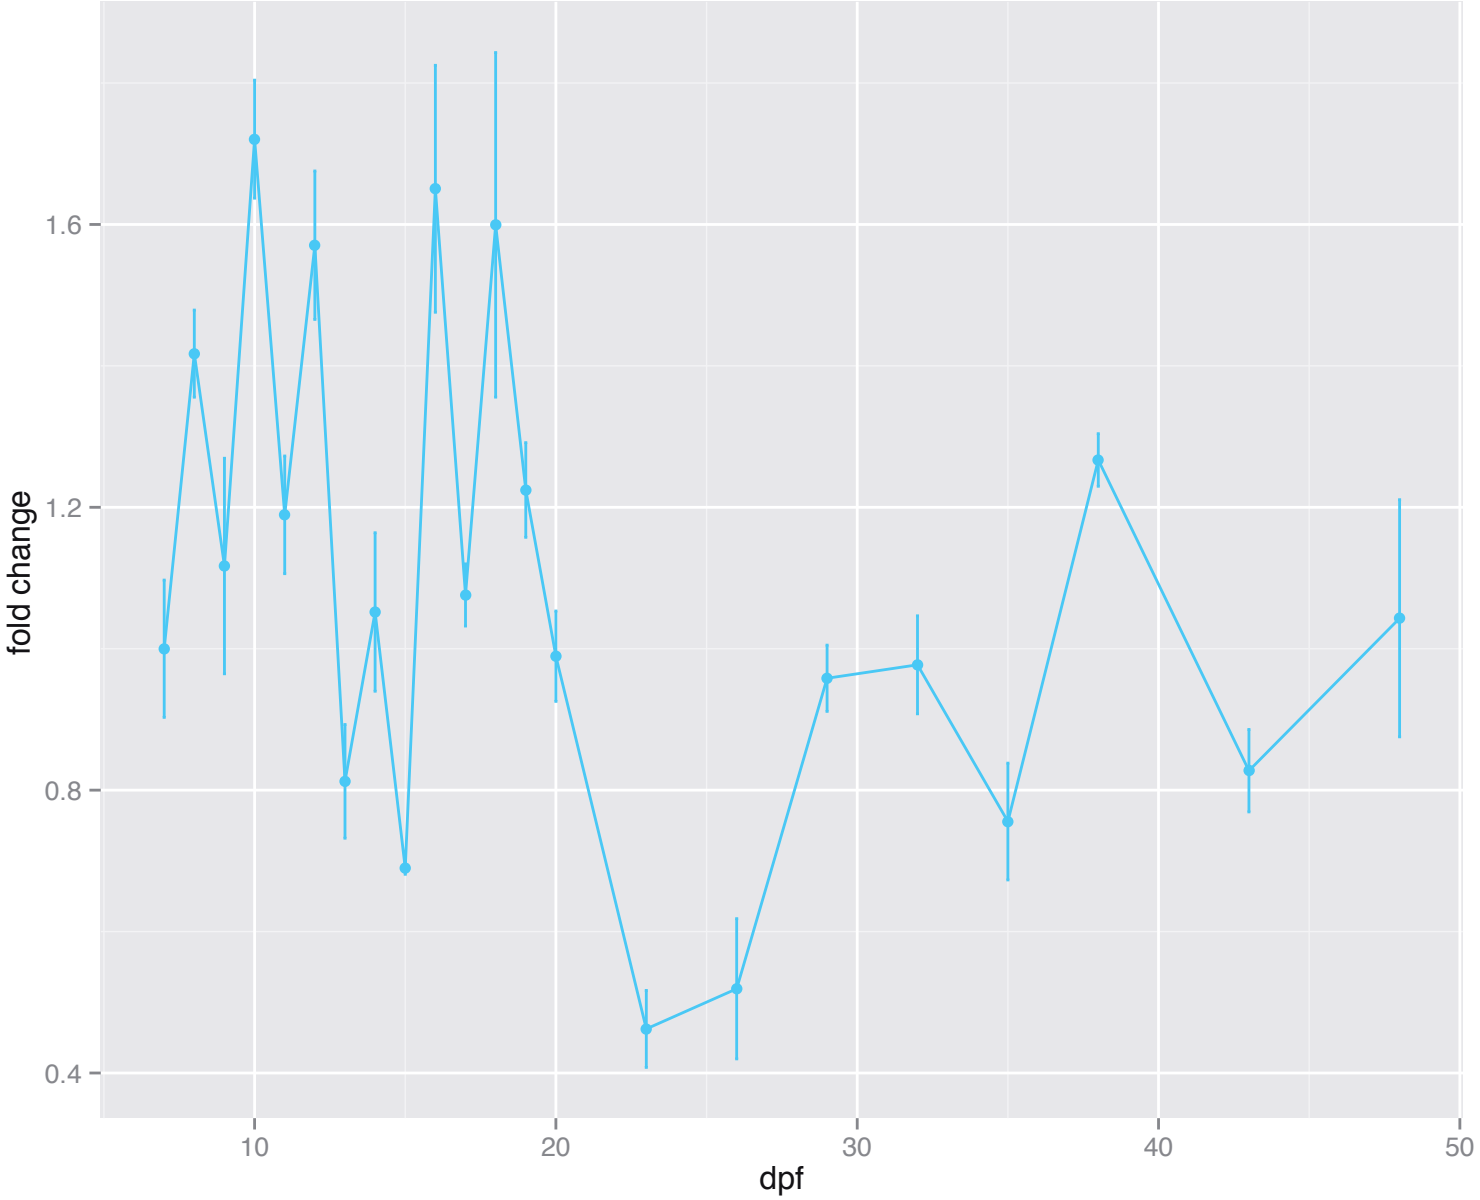

*cyp11b* in trunks

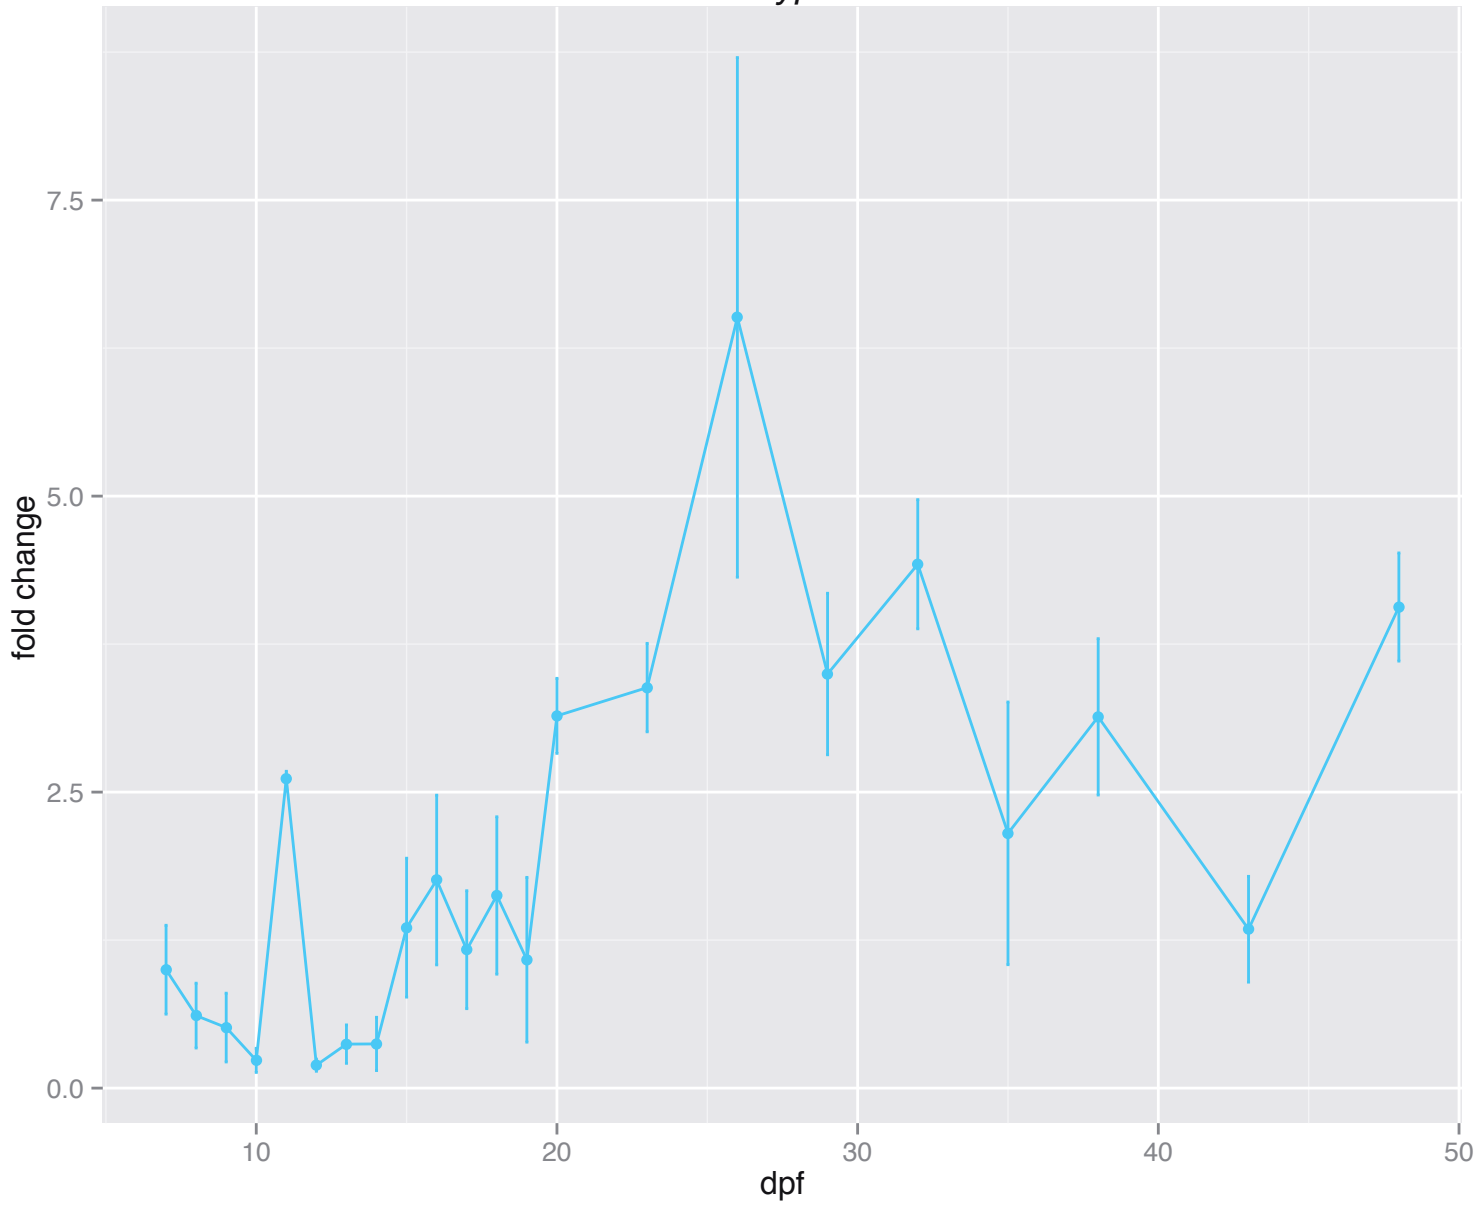

*cyp19a1A* in trunks

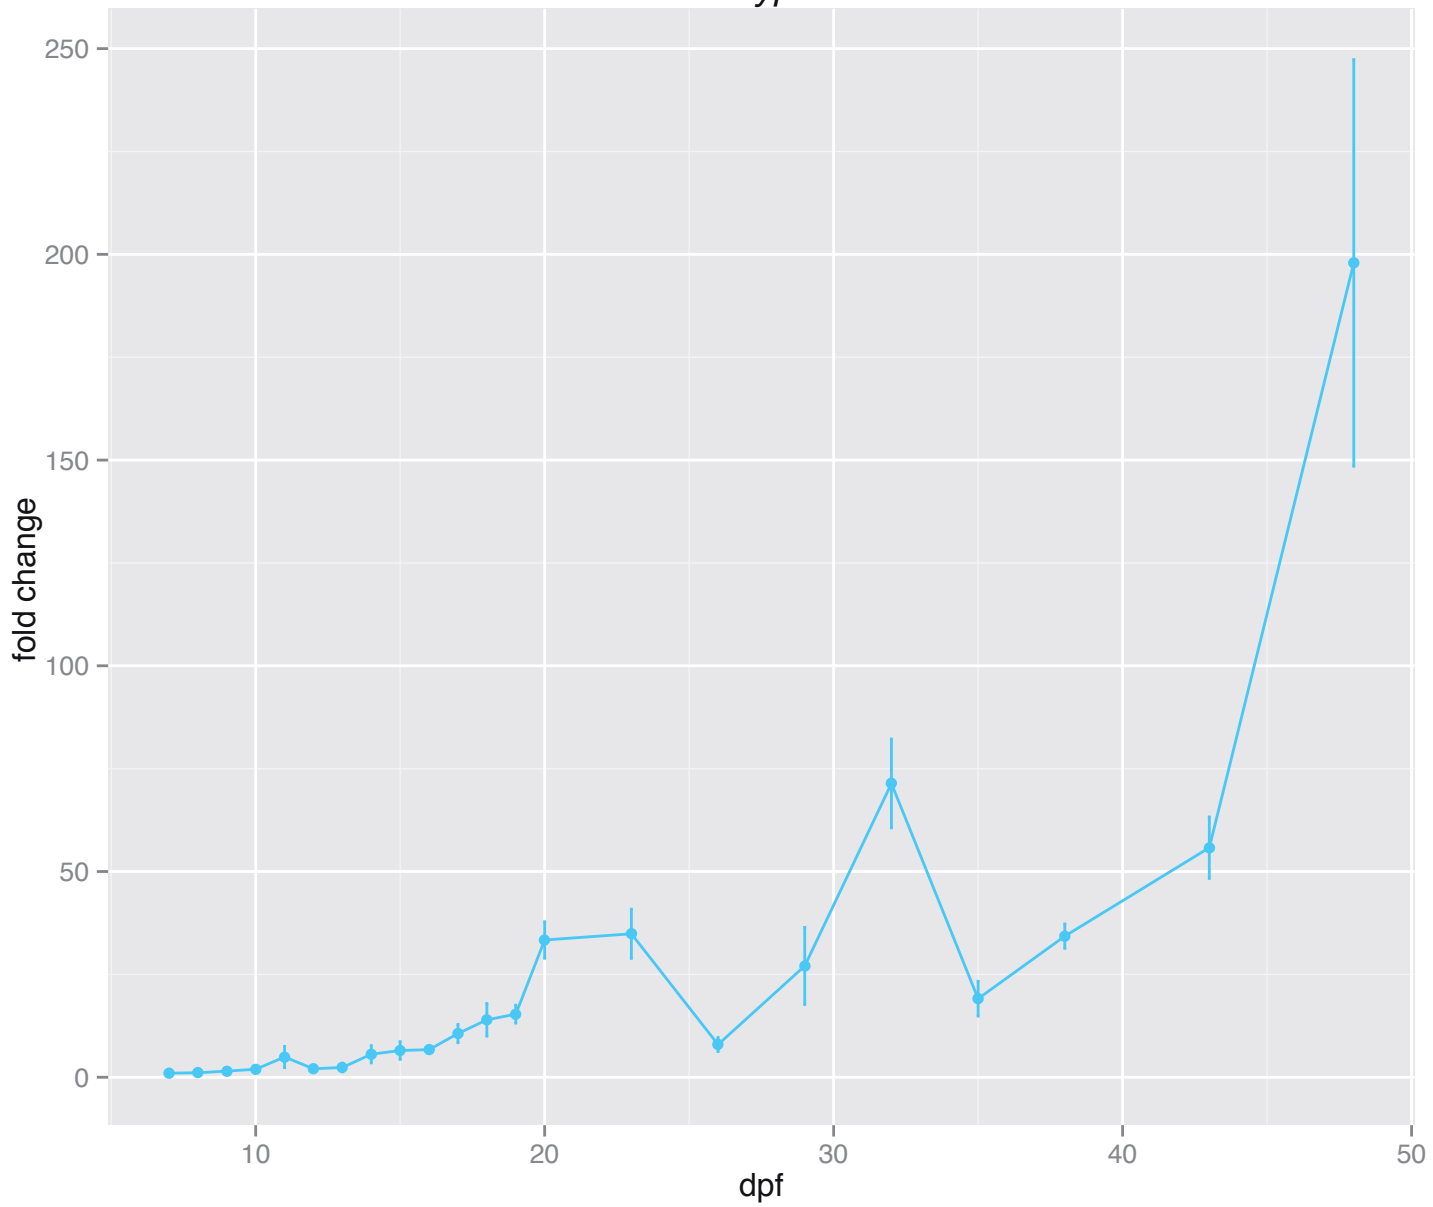

*cyp19a1B* in trunks

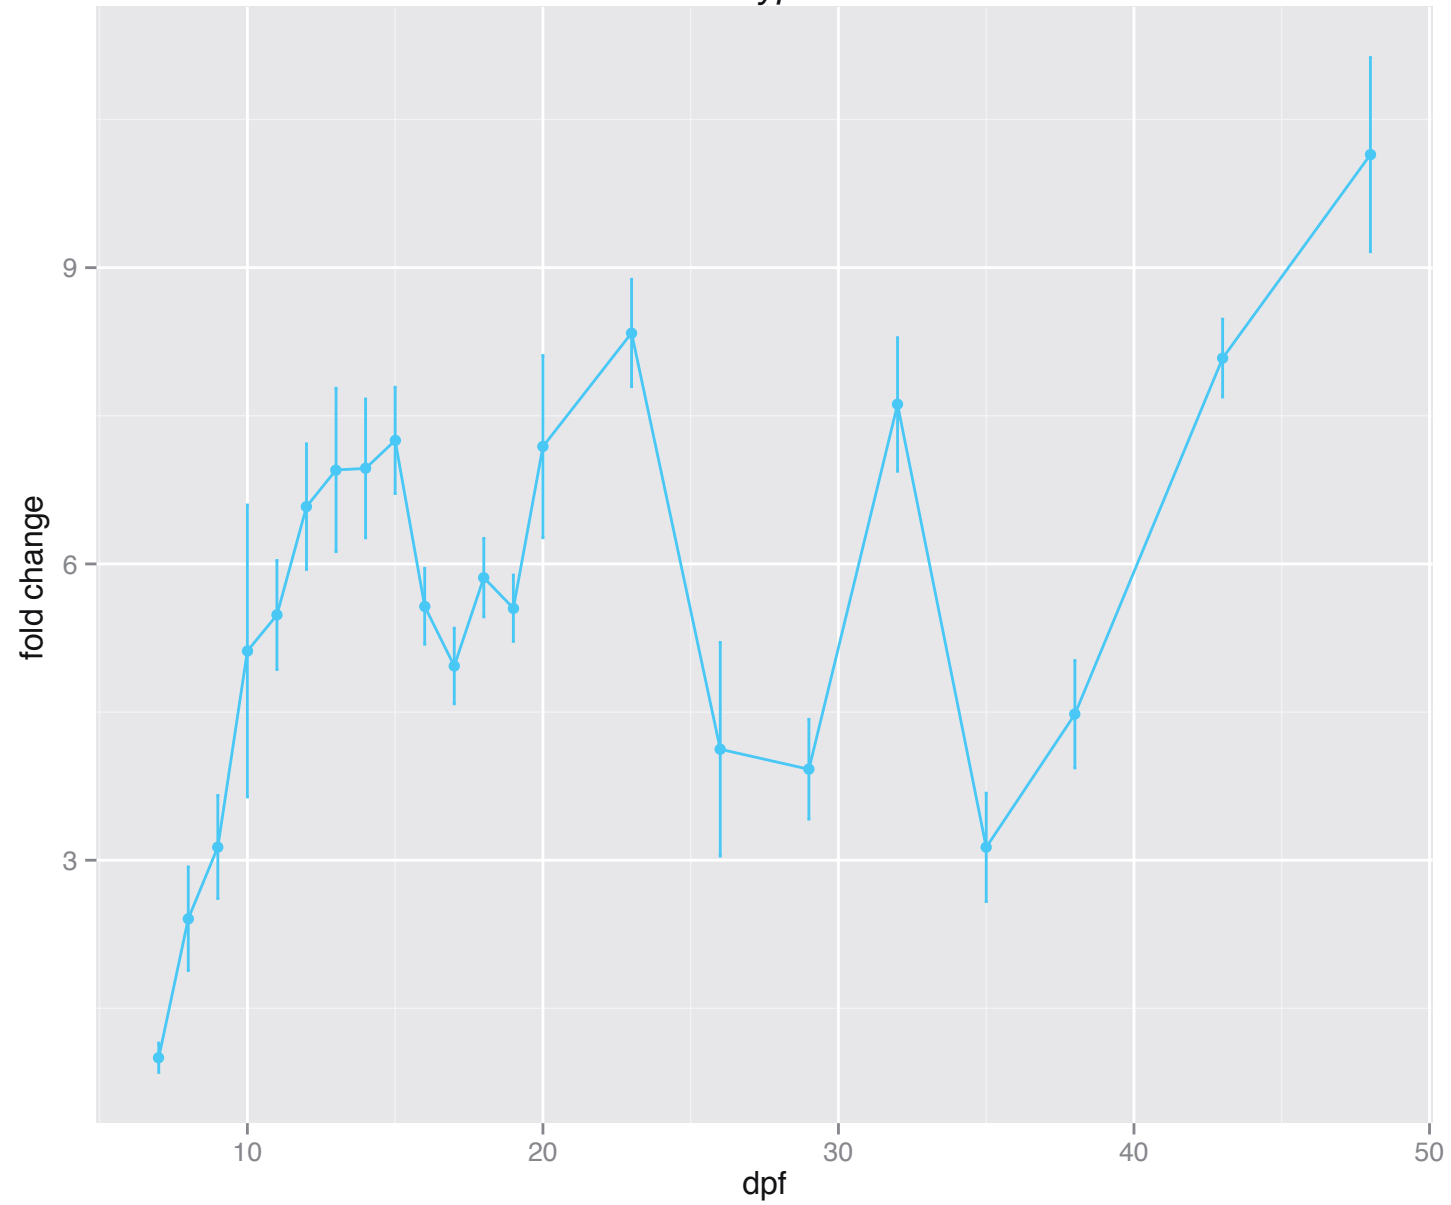

*dax1A* in trunks

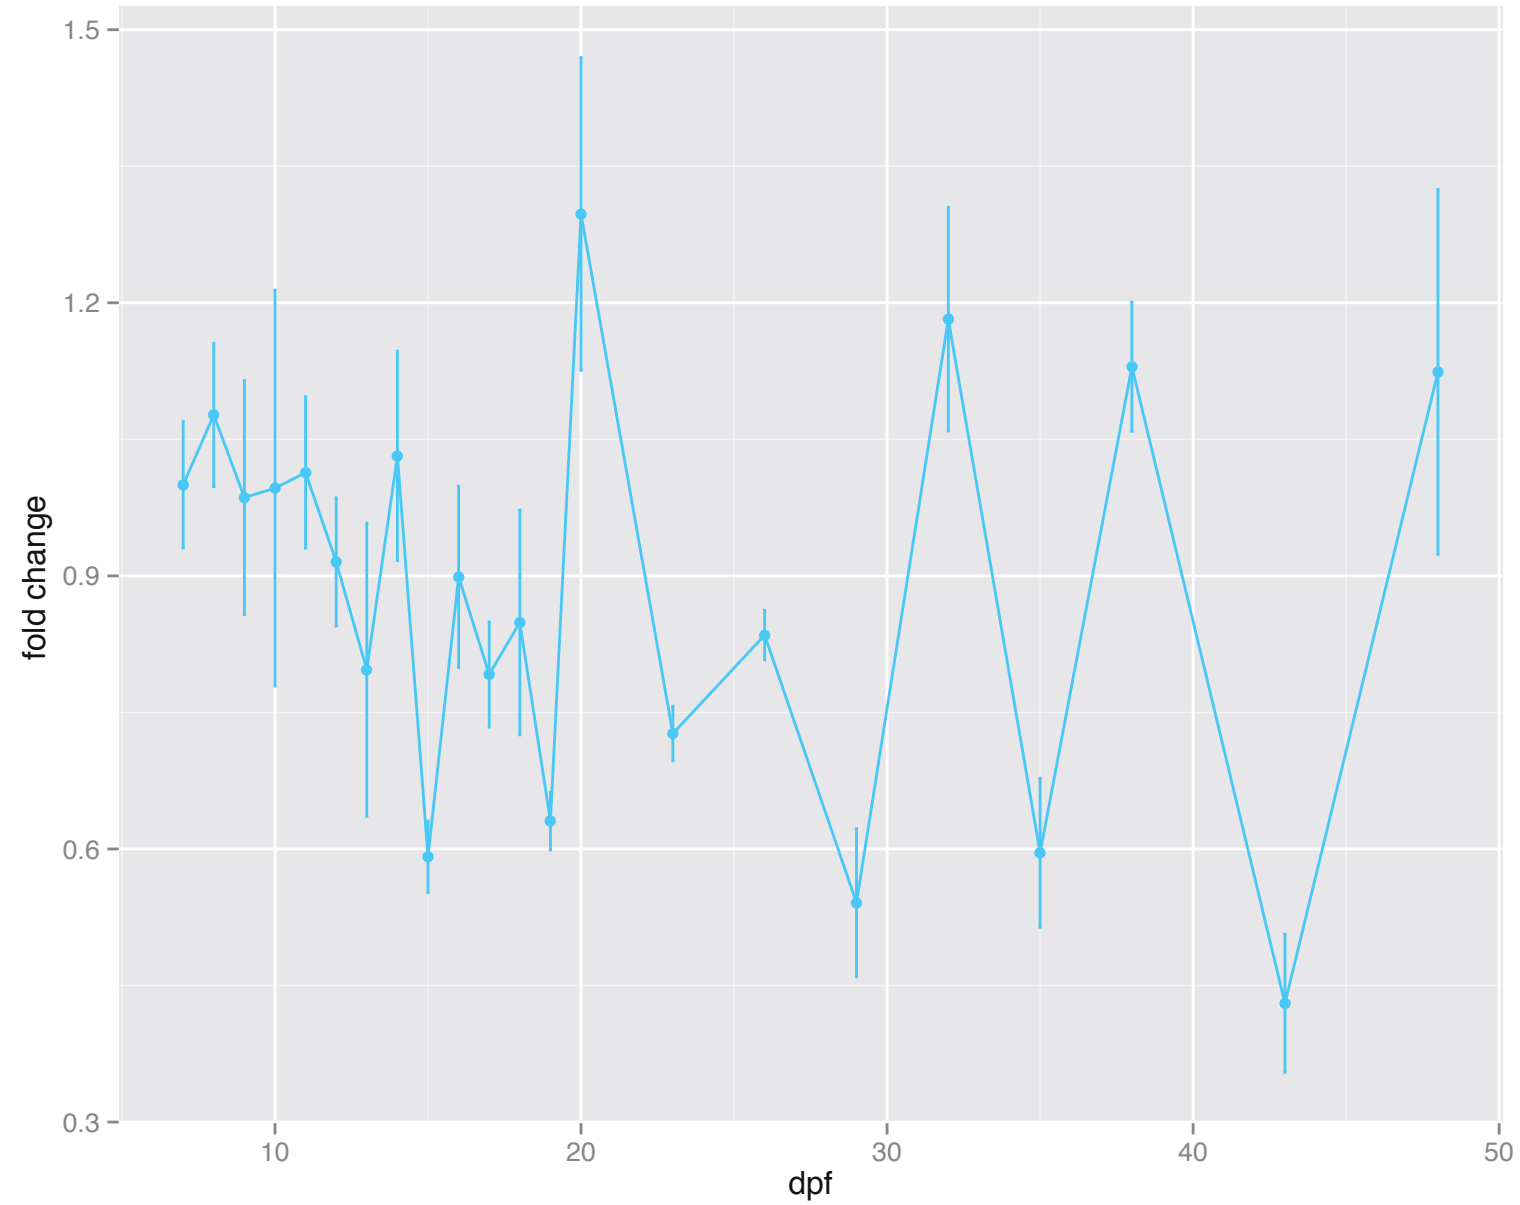

*dmrt1* in trunks

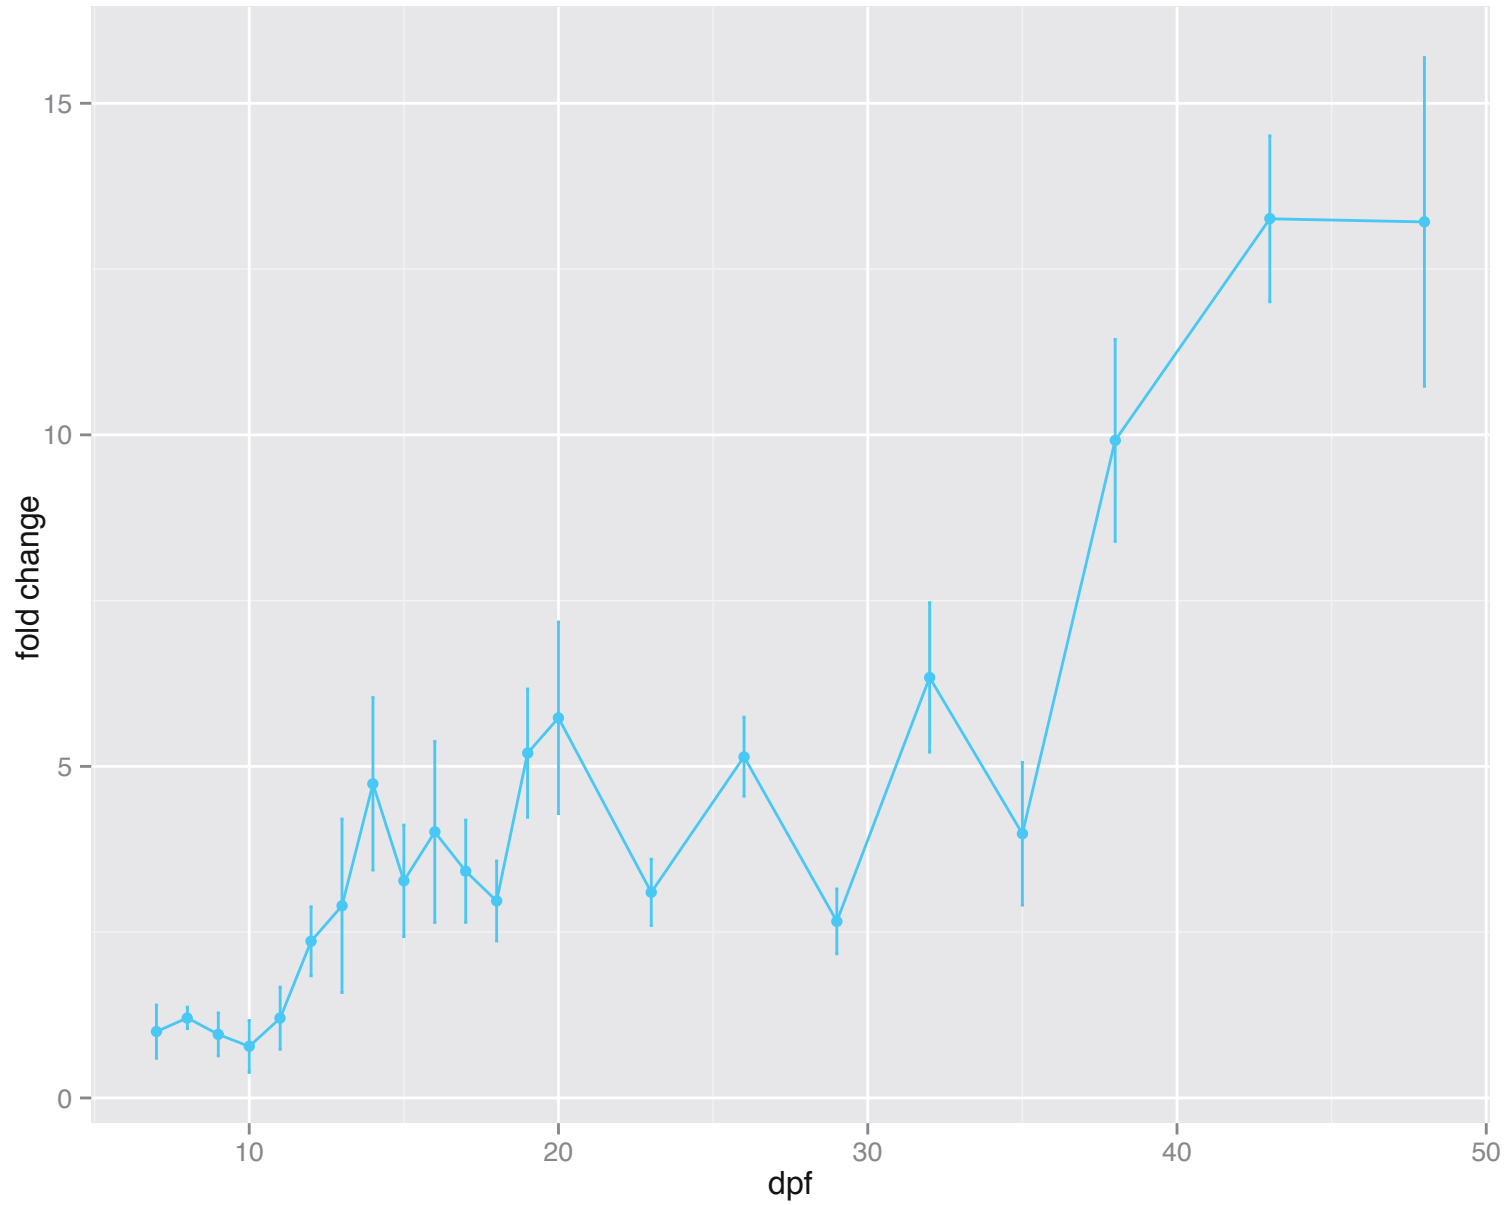

*figla* in trunks

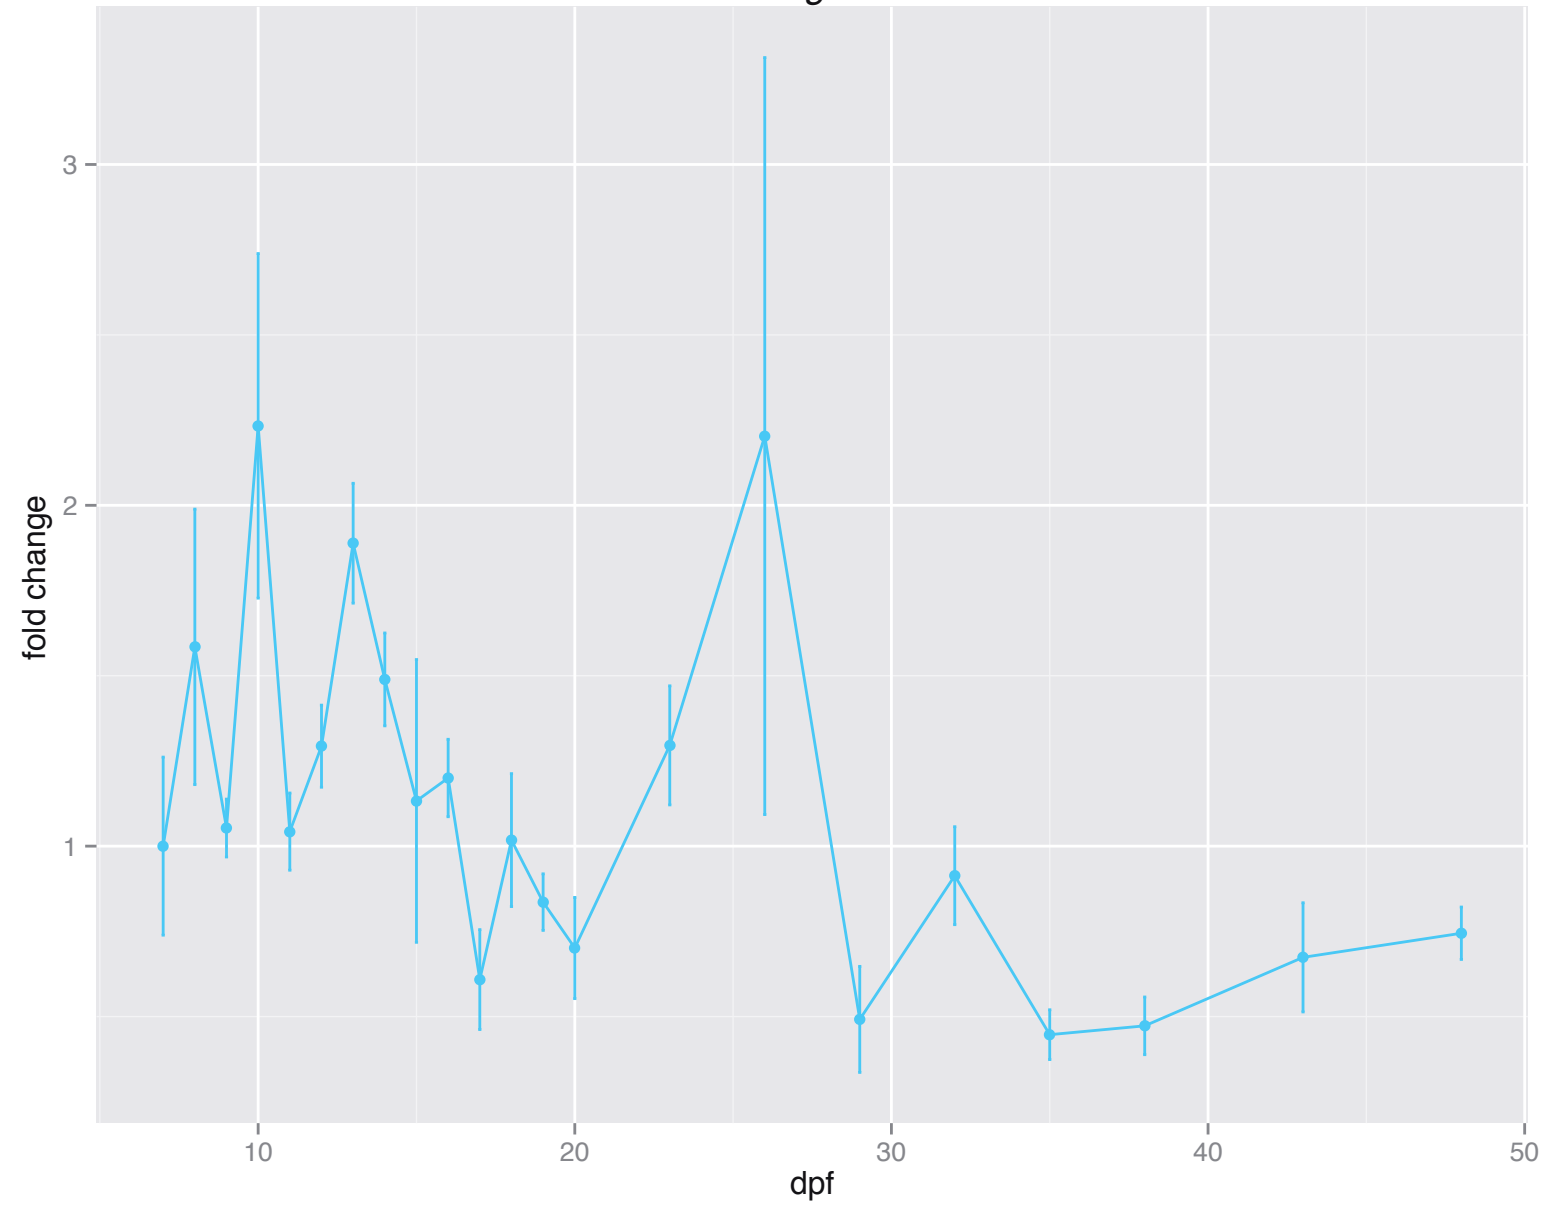



*foxl2A/foxl2* in trunks

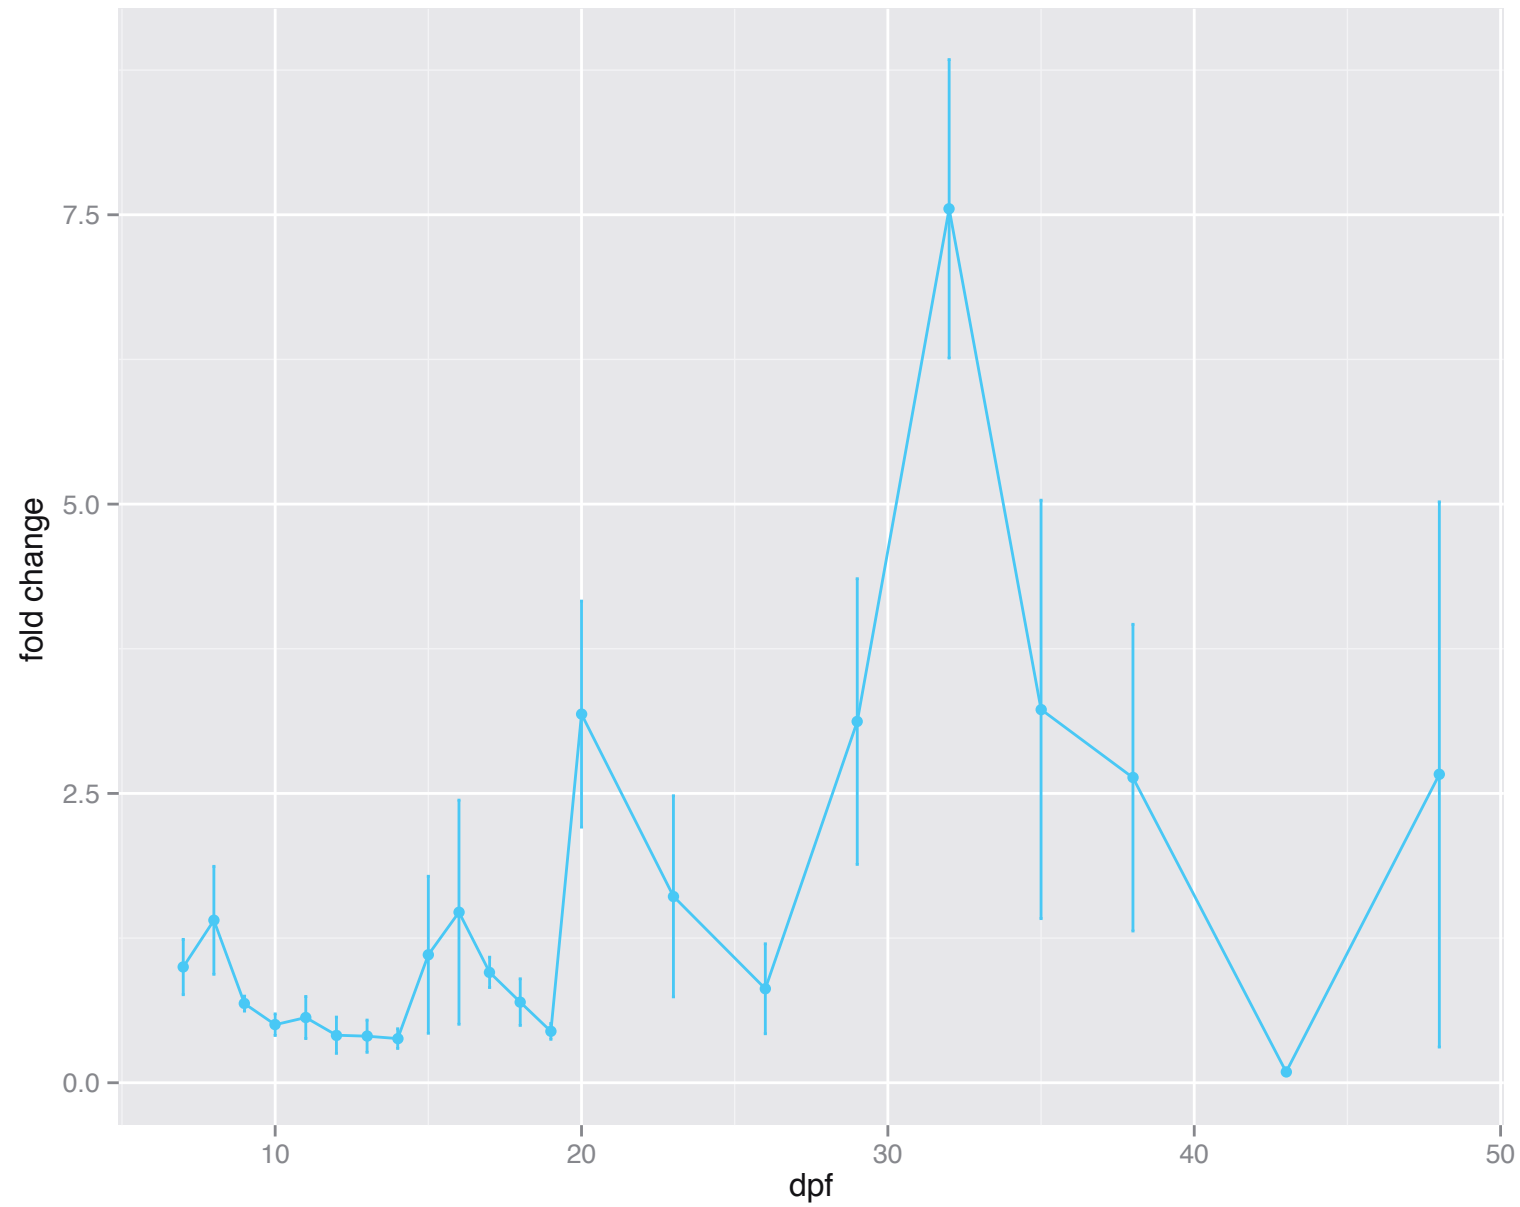

*foxl2B* in trunks

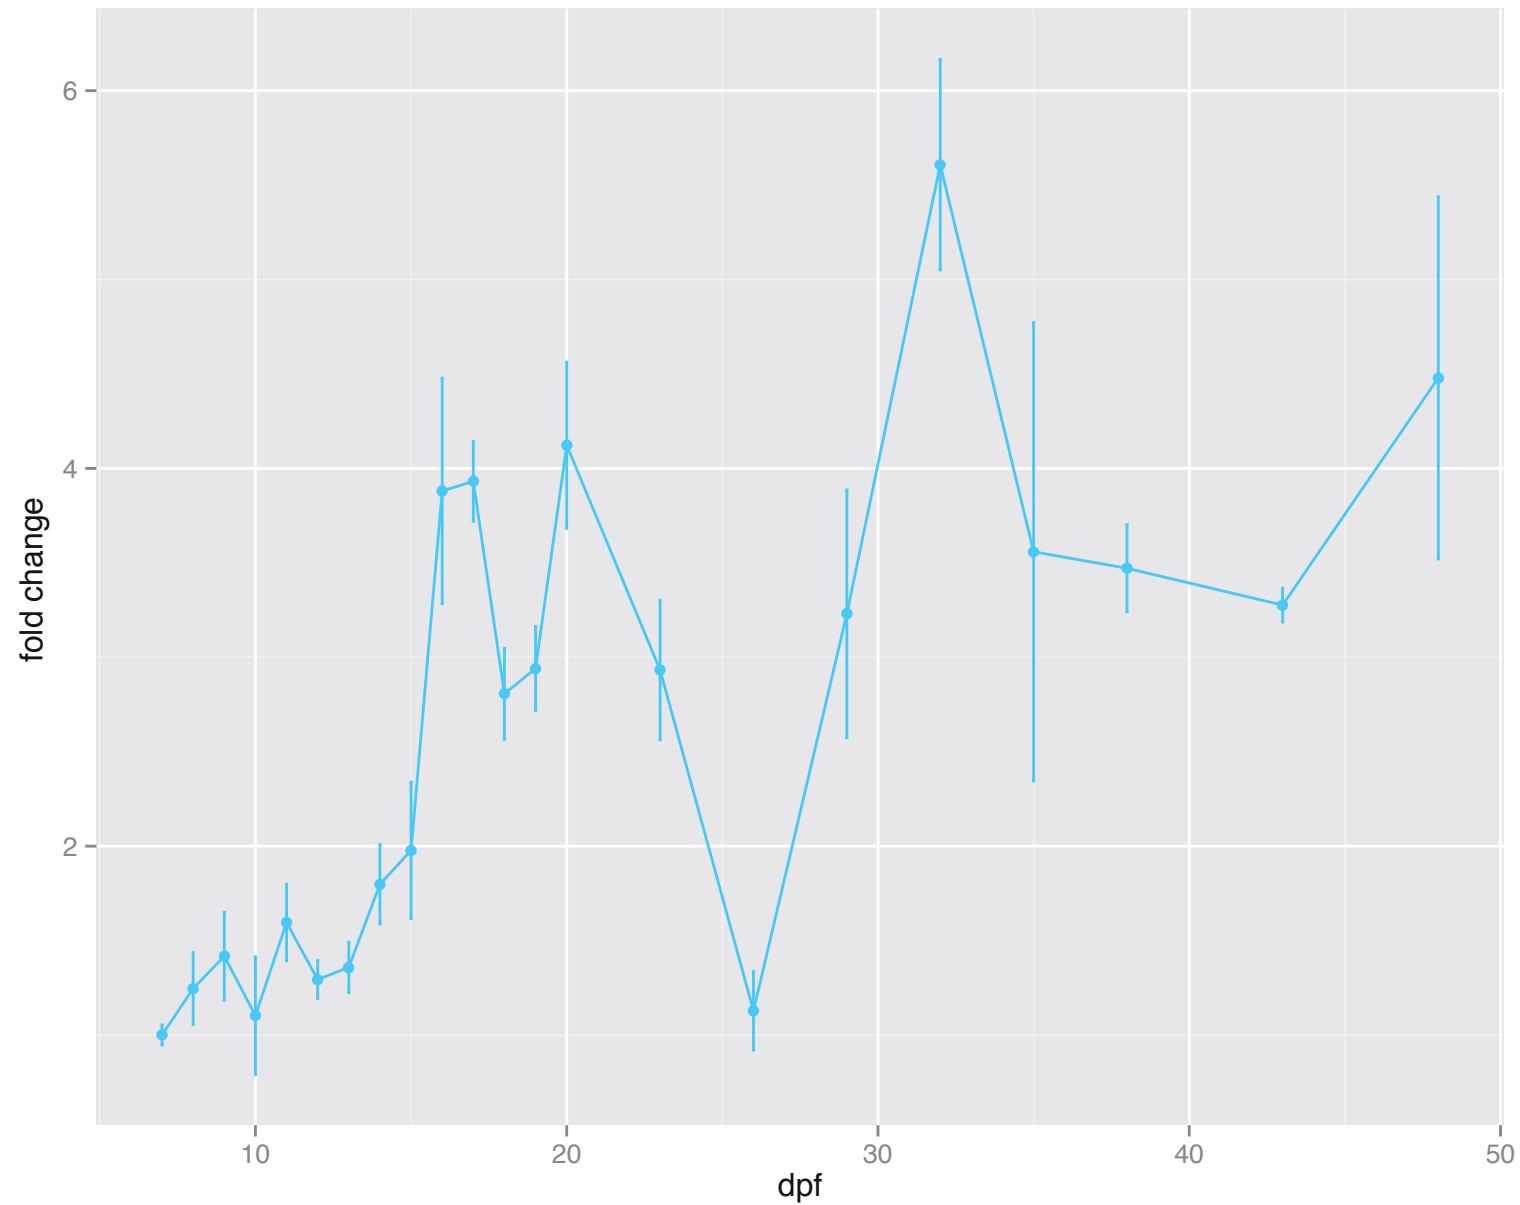

*gata4* in trunks

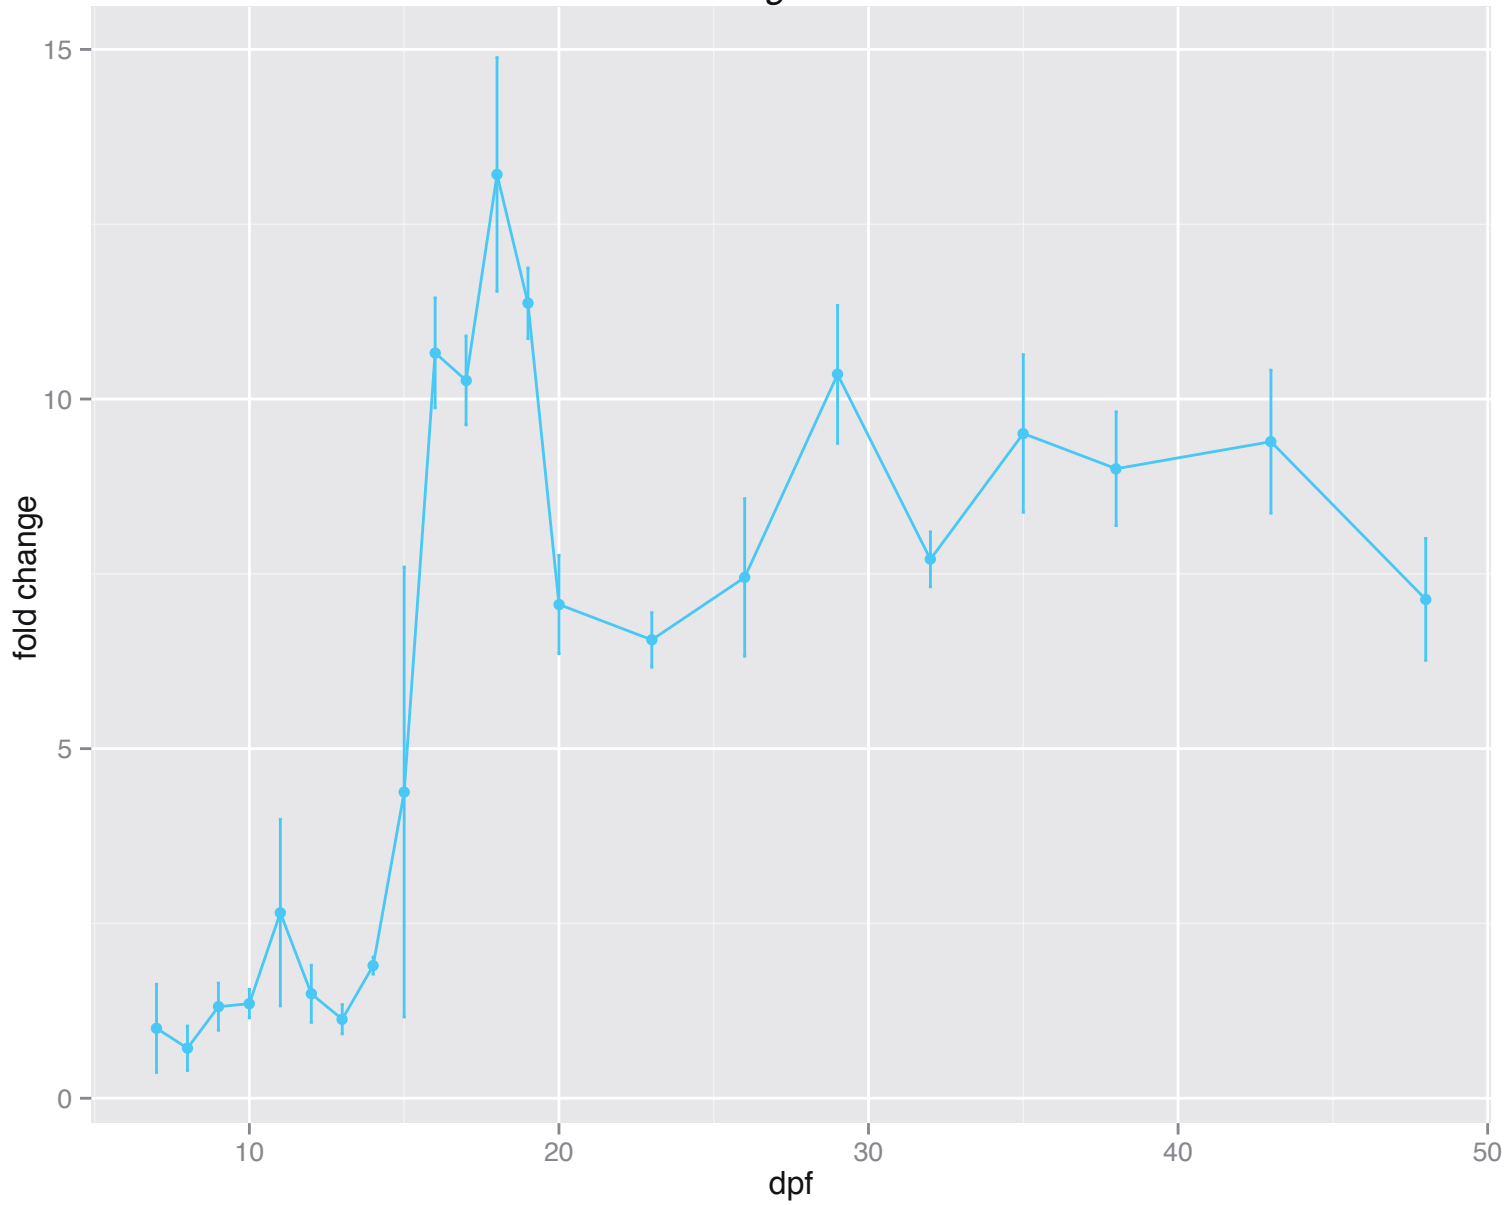

*gsdf* in trunks

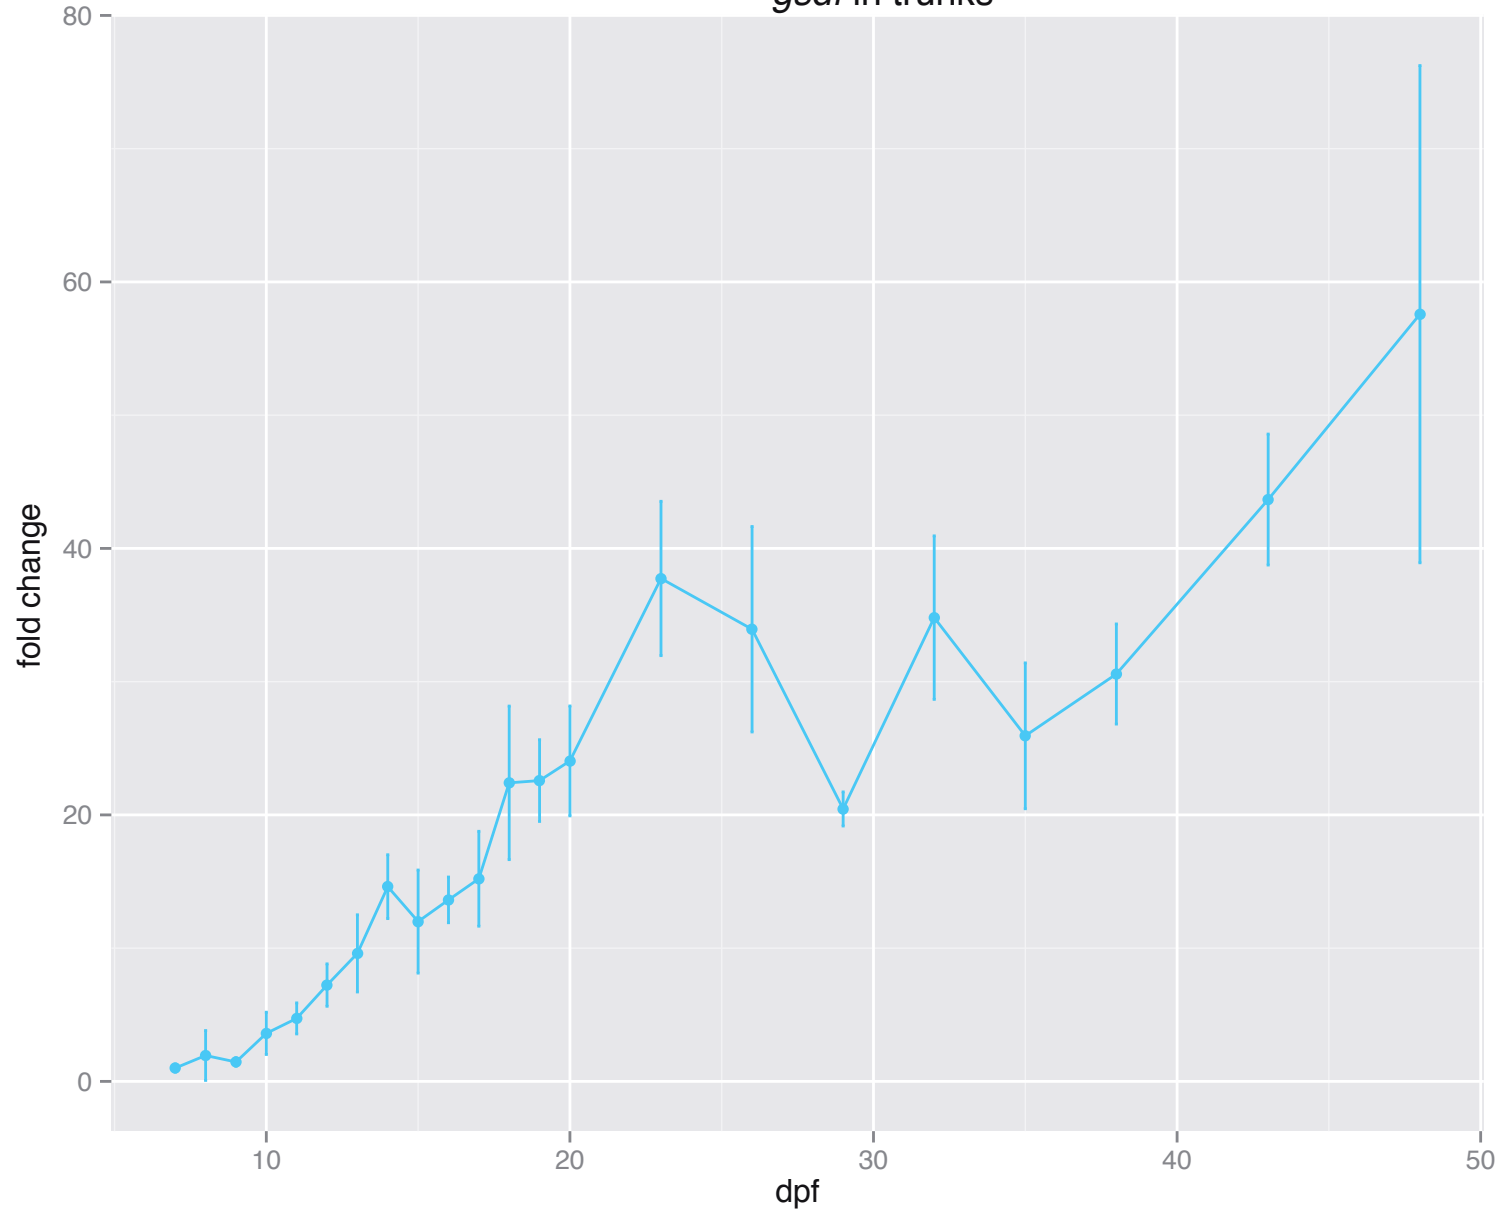

*nanos1A* in trunks

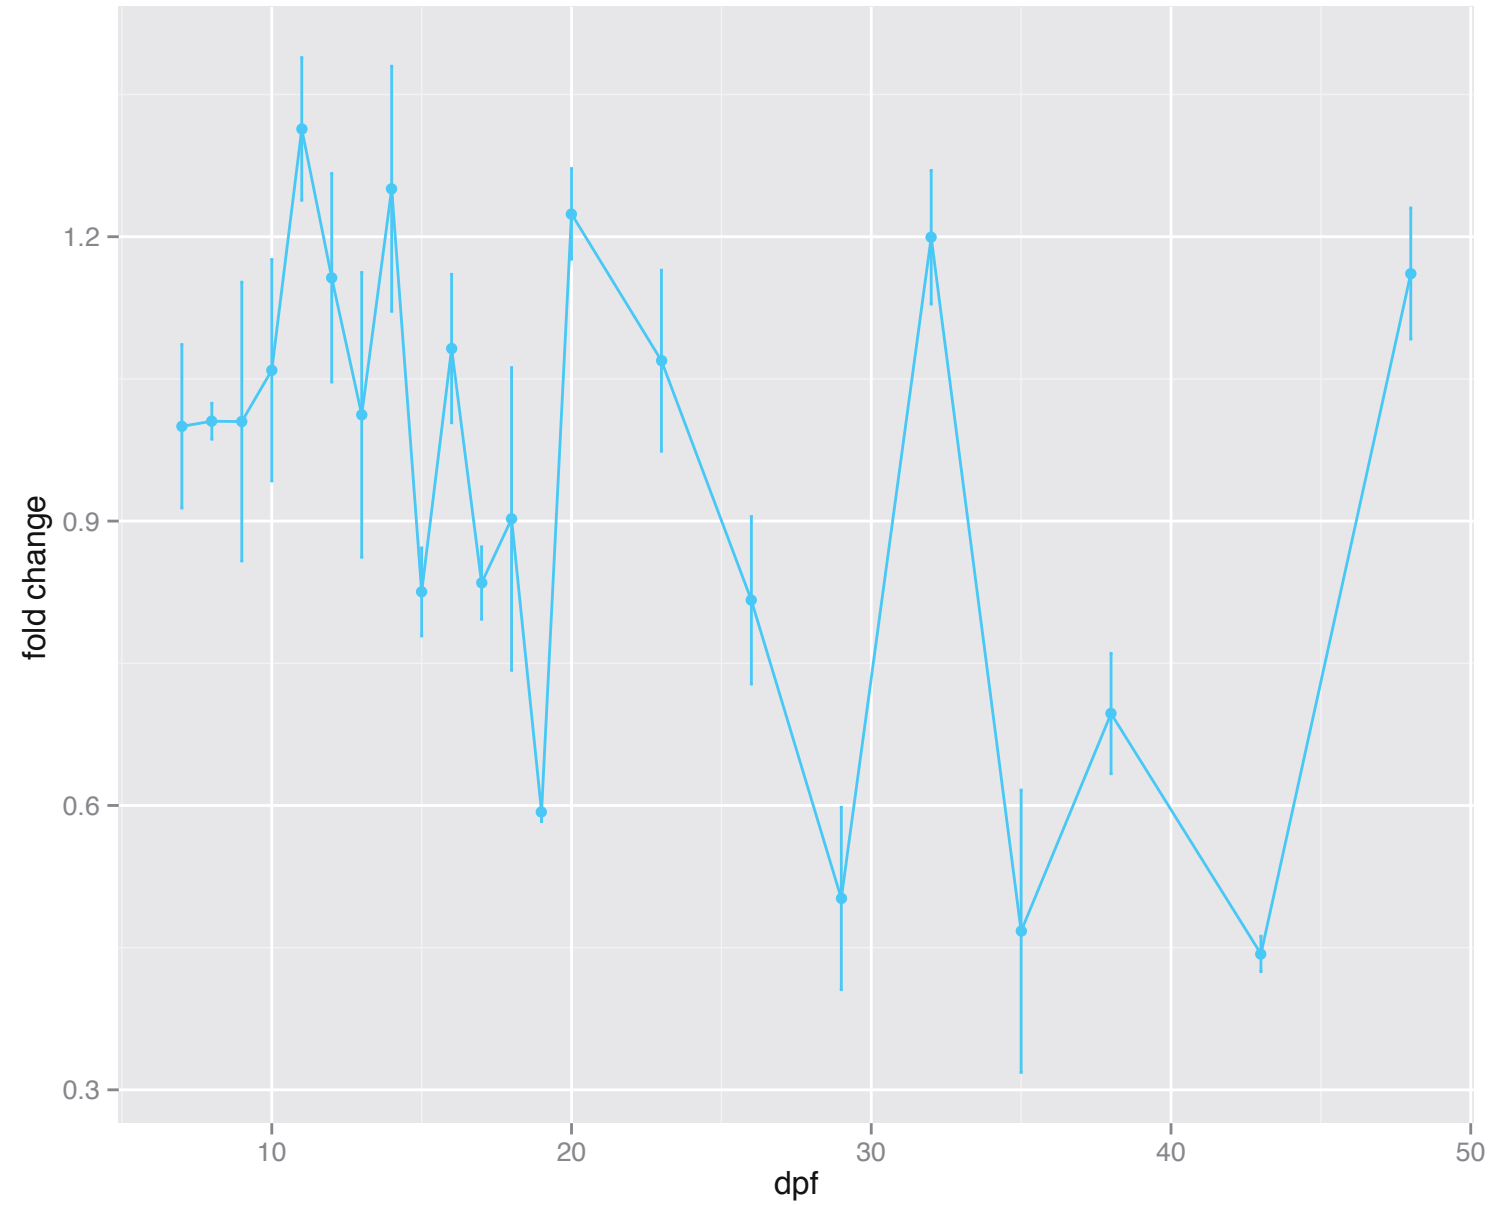

*nanos1B* in trunks

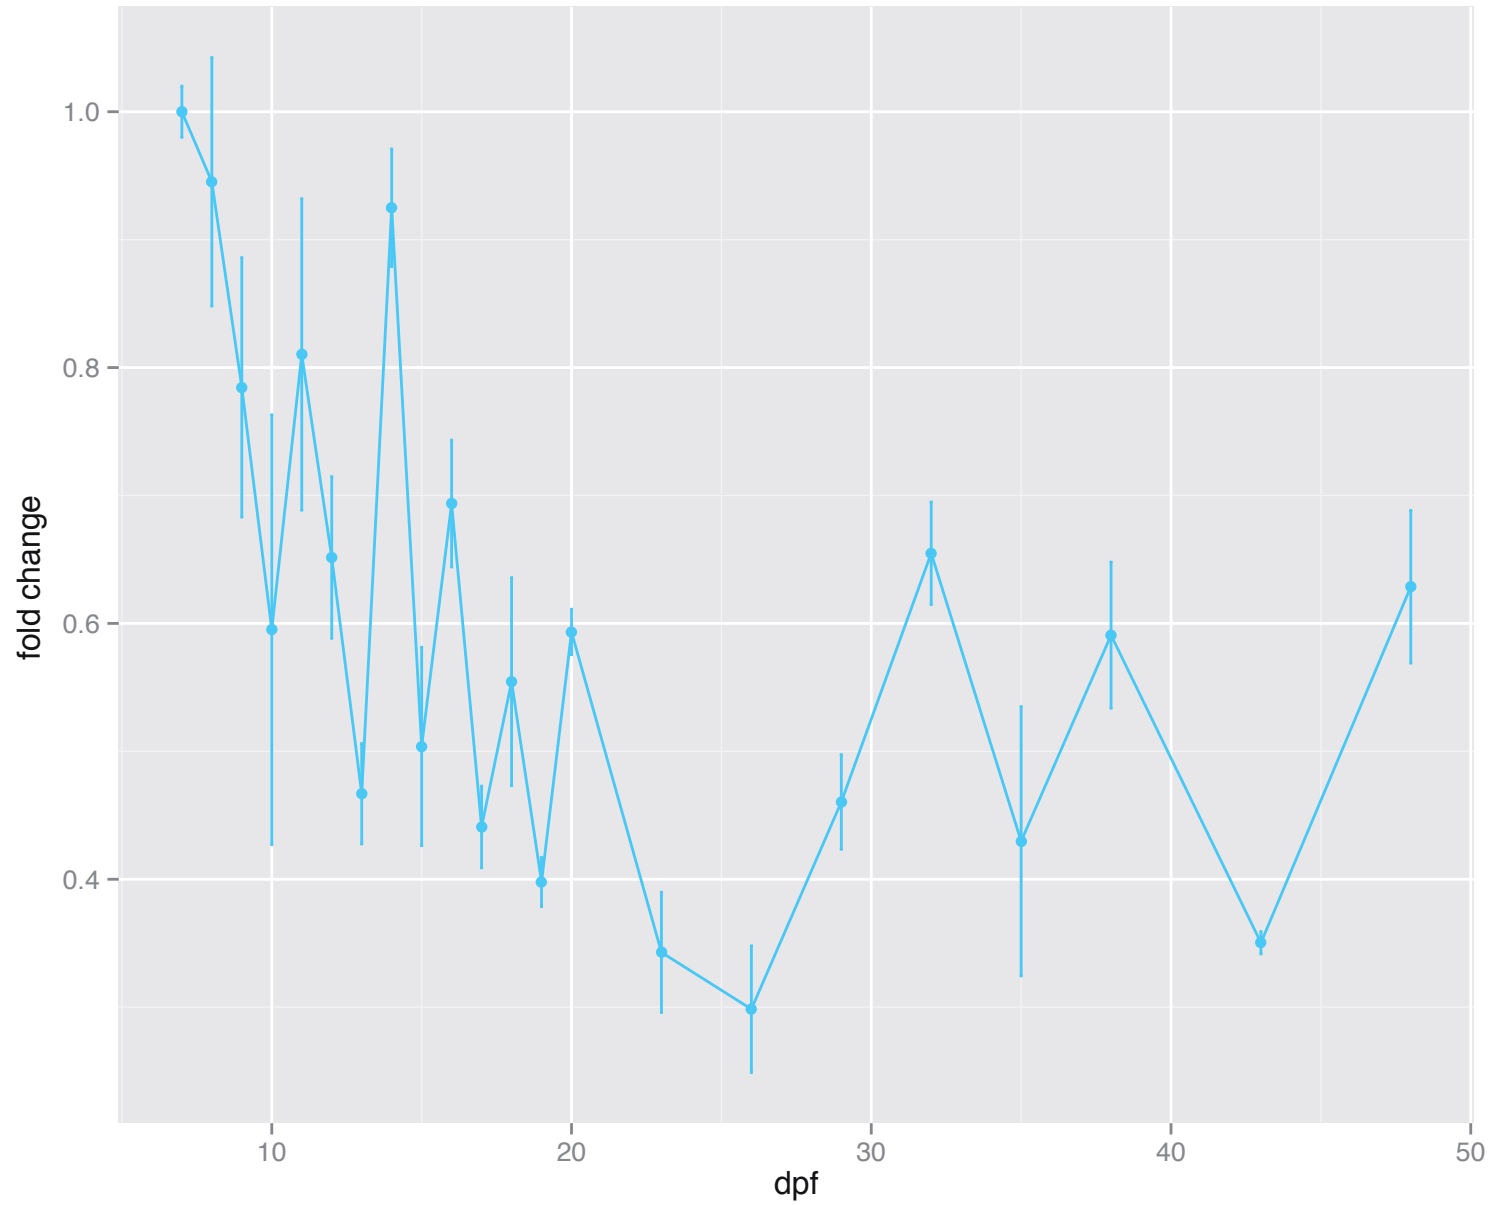

*nr5a2* in trunks

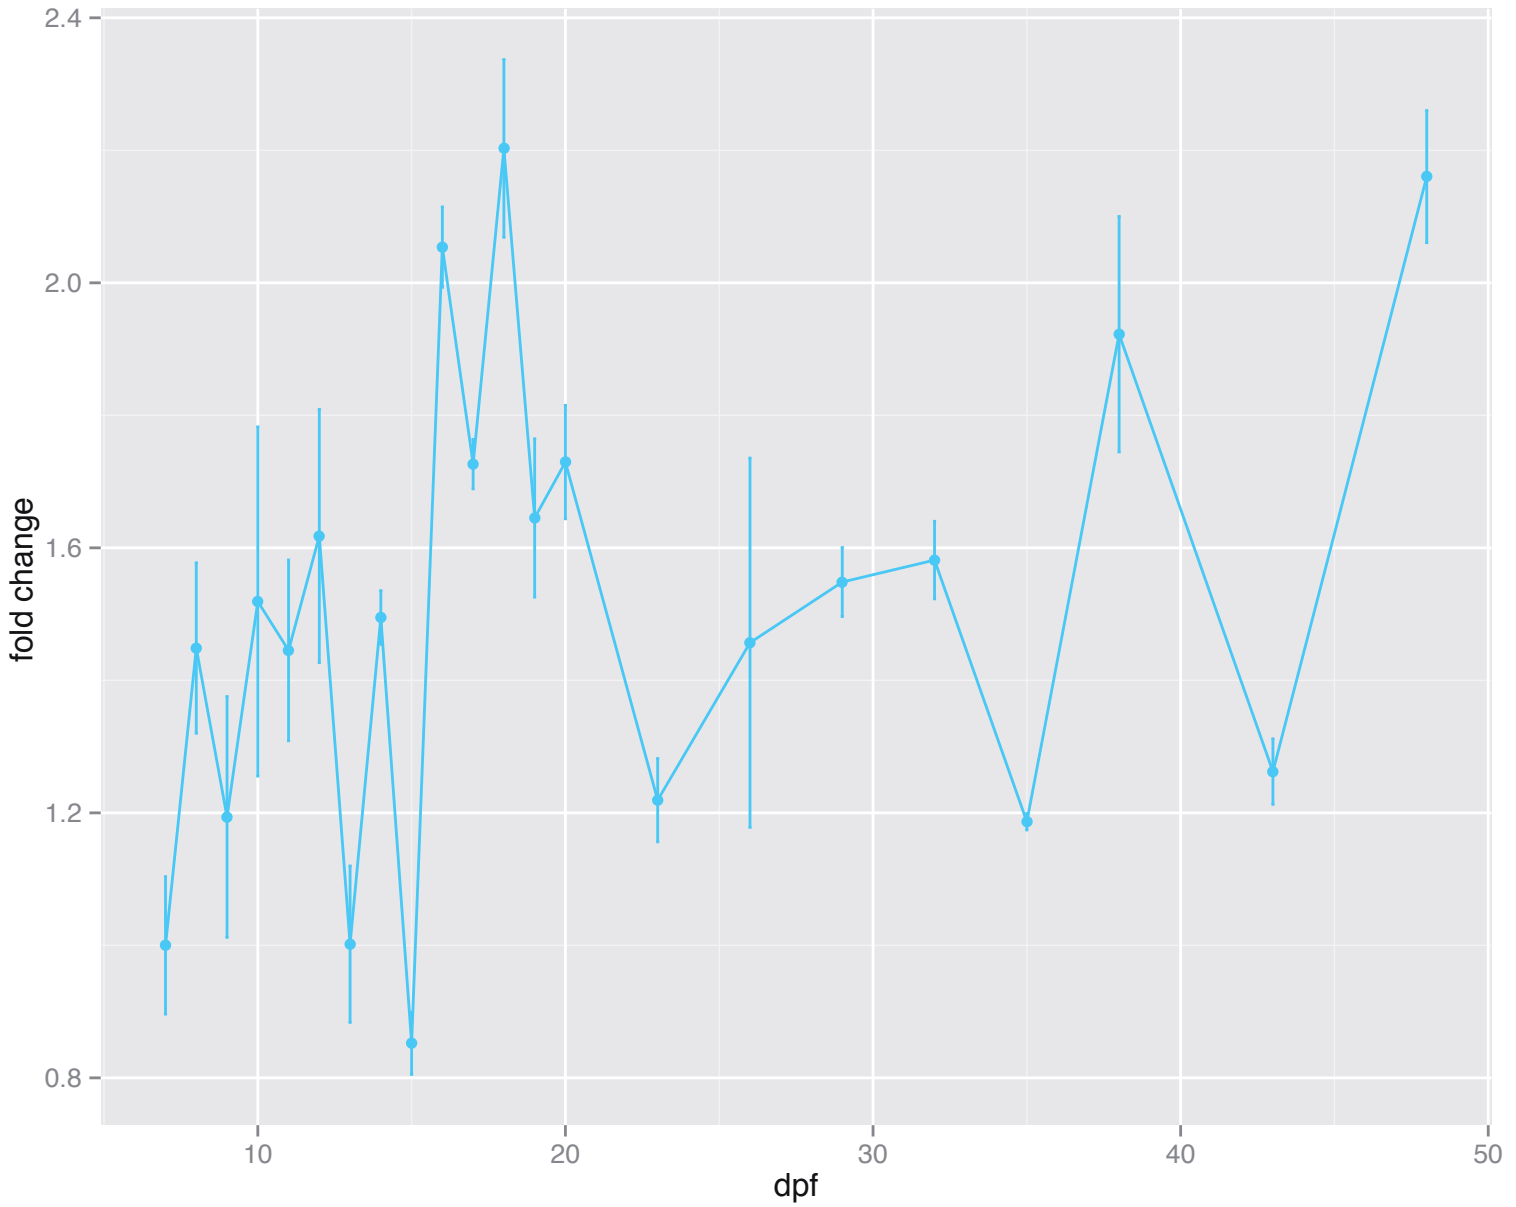

*nr5a5* in trunks

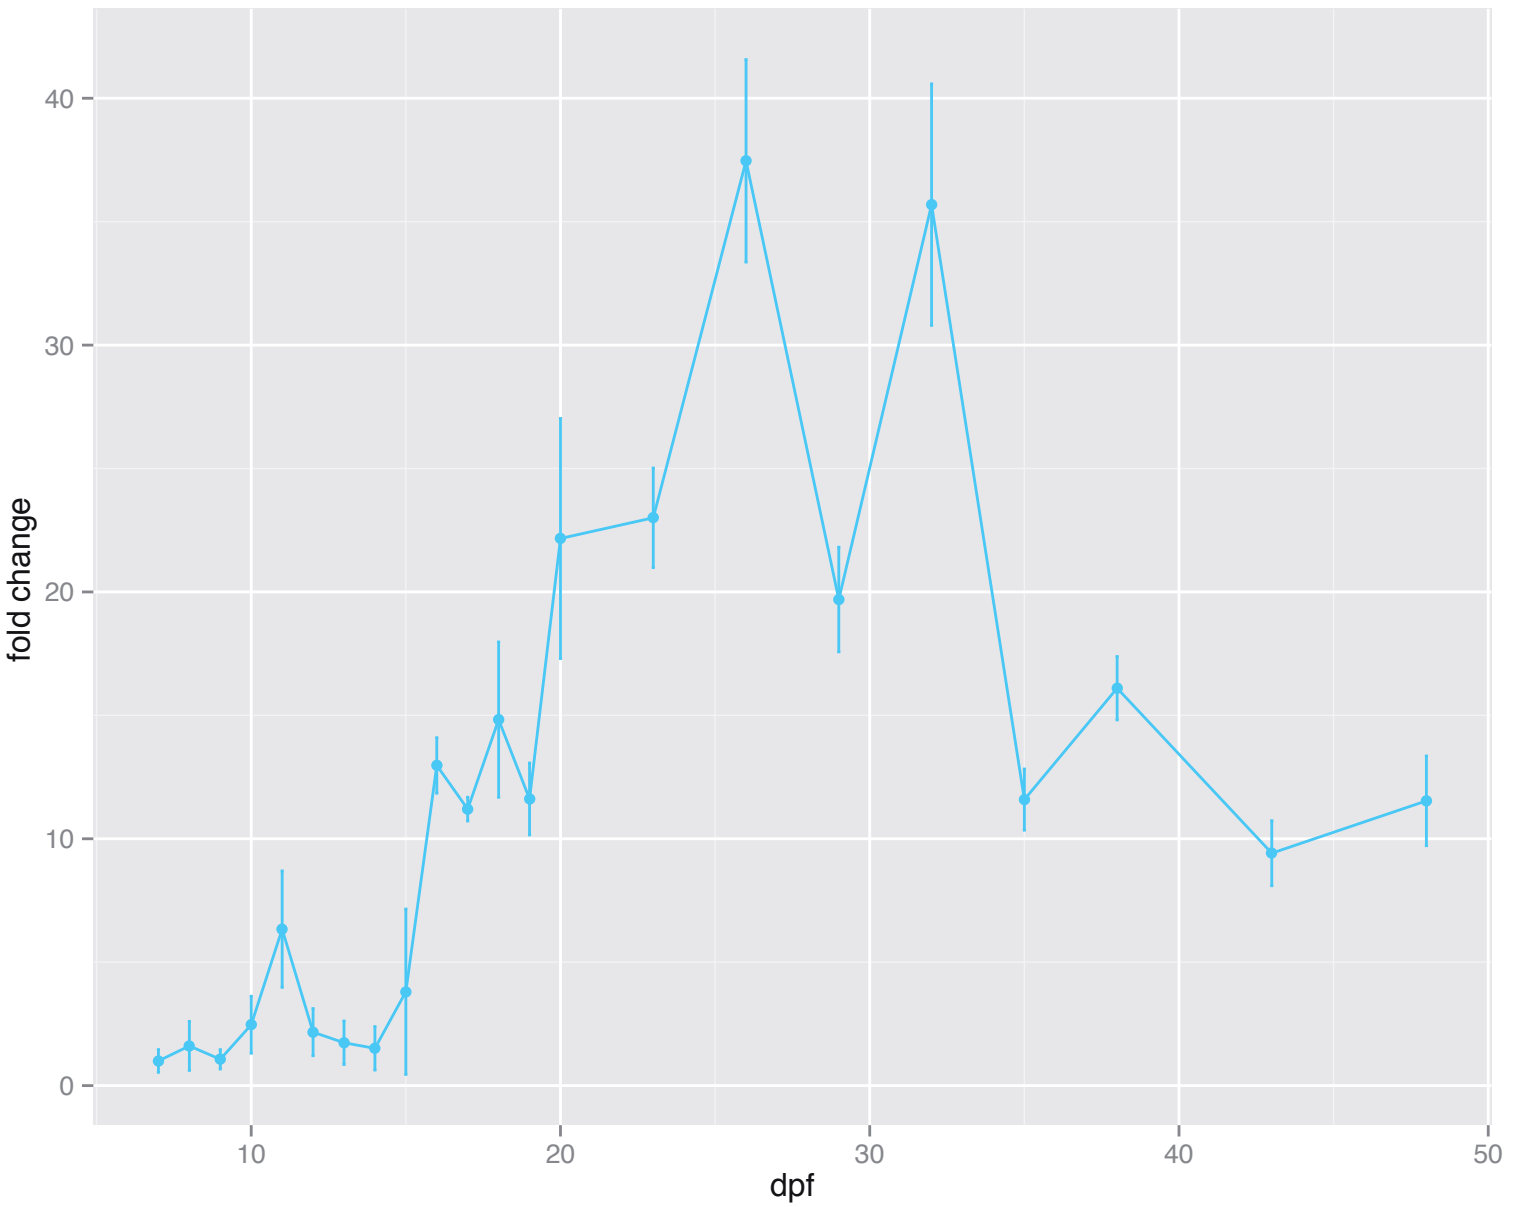



*rspo1* in trunks

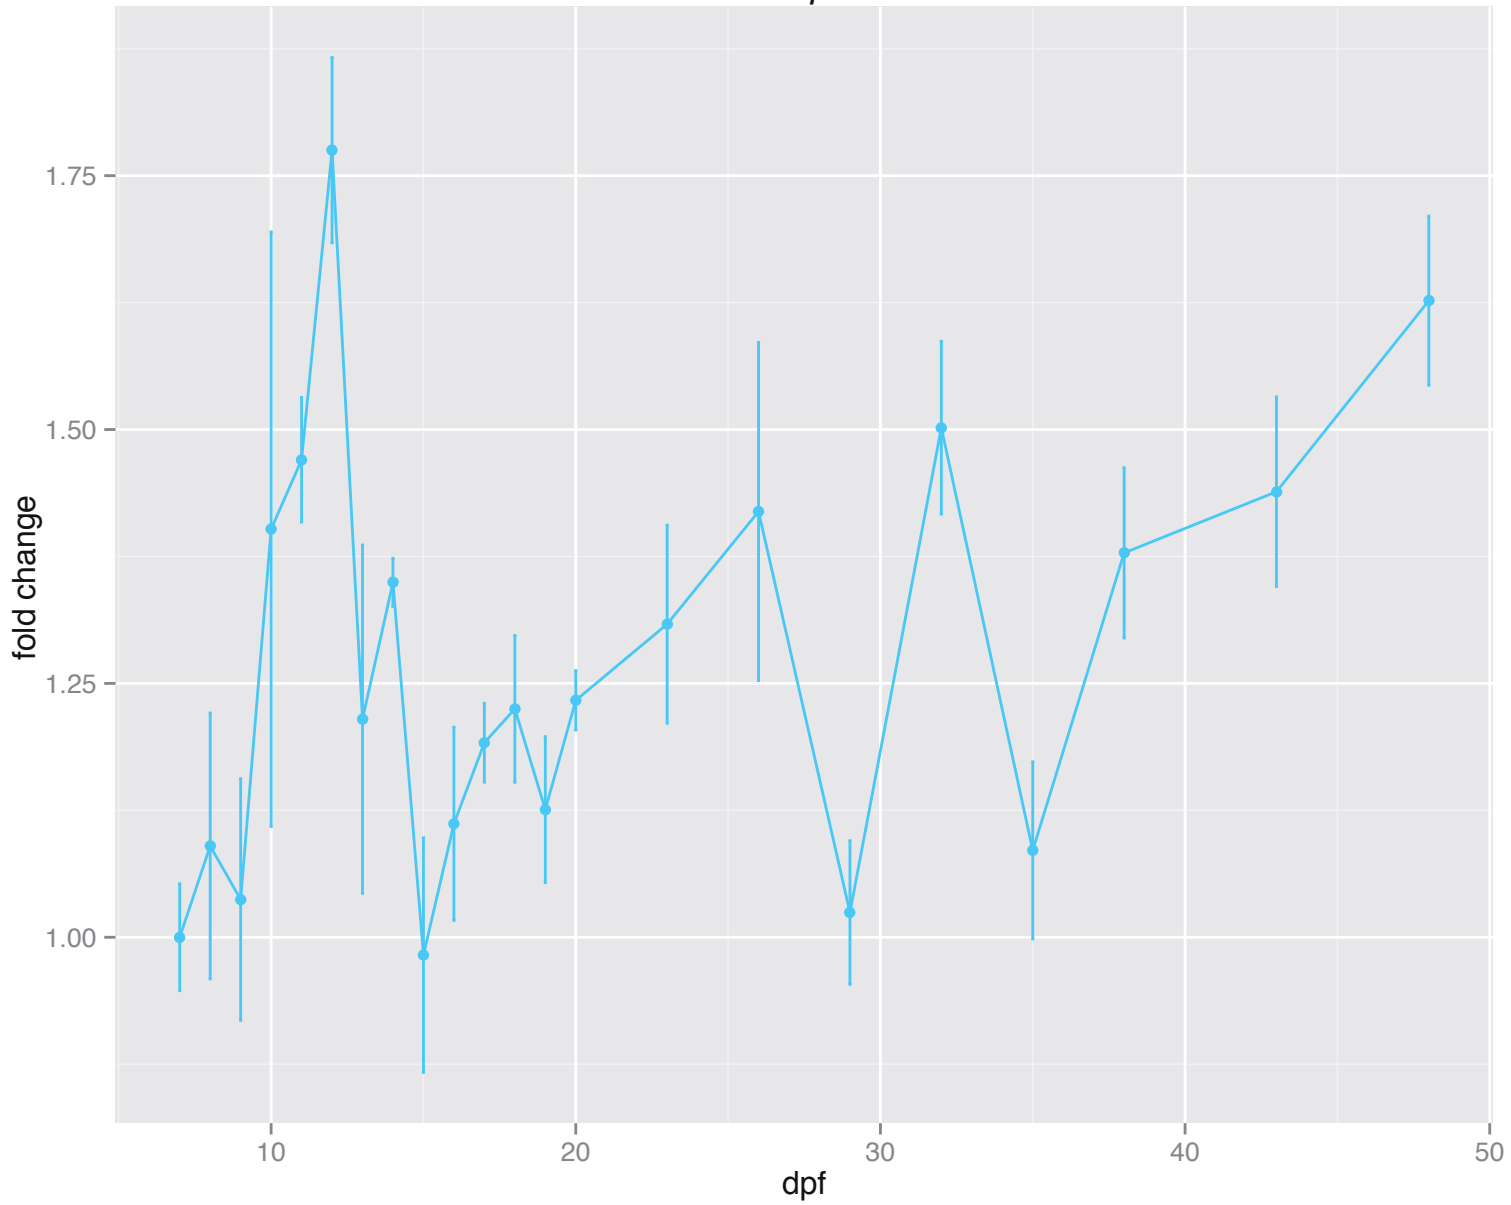

*sf-1* in trunks

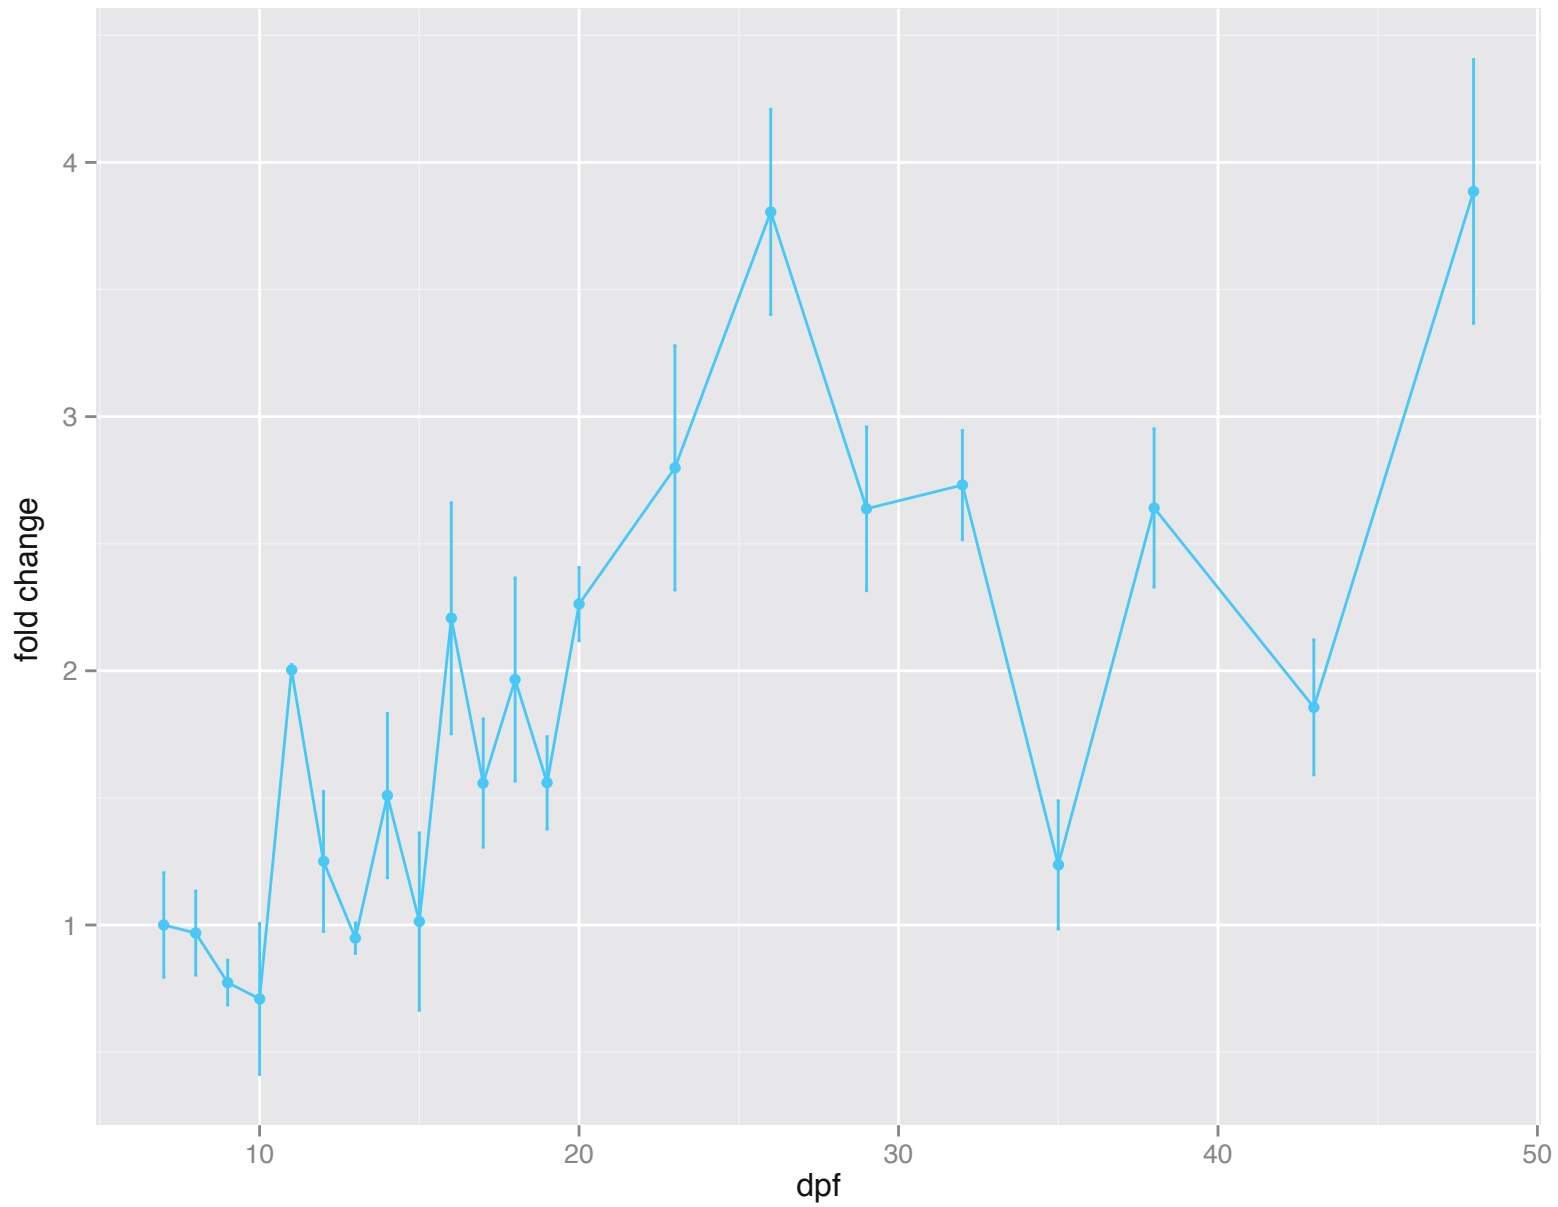

*sox9A* in trunks

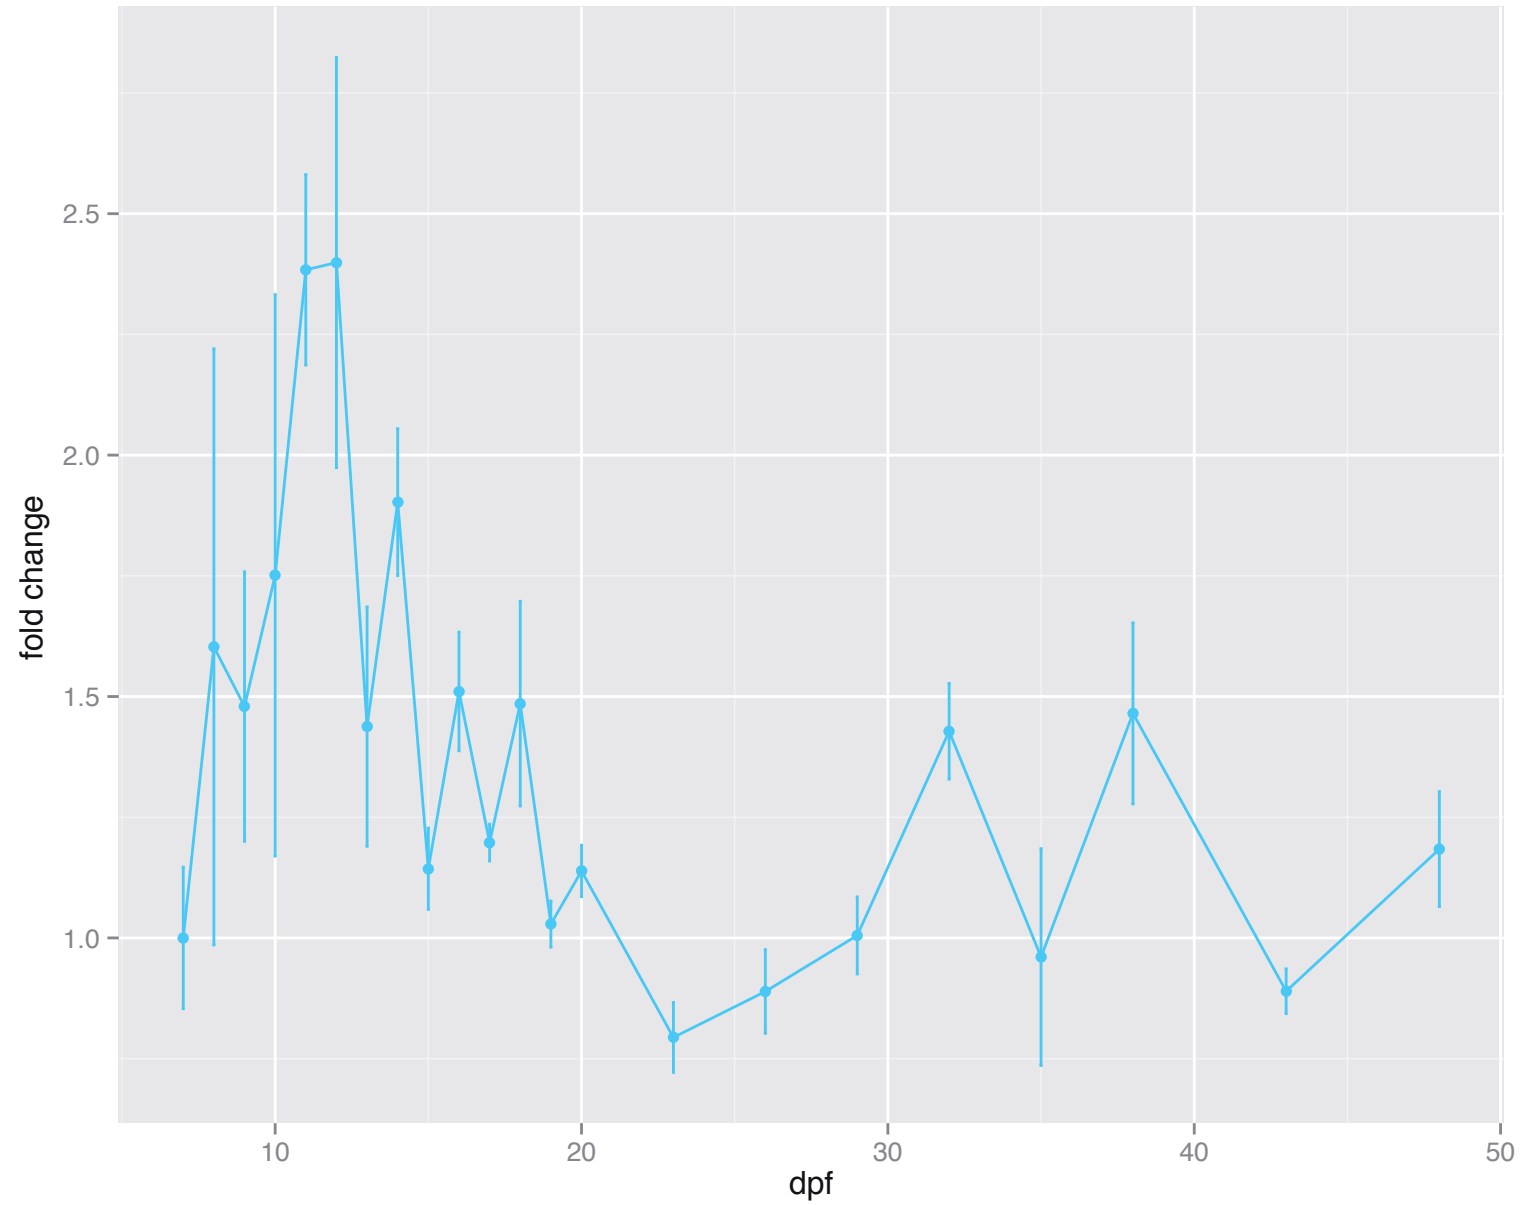

*sox9B* in trunks

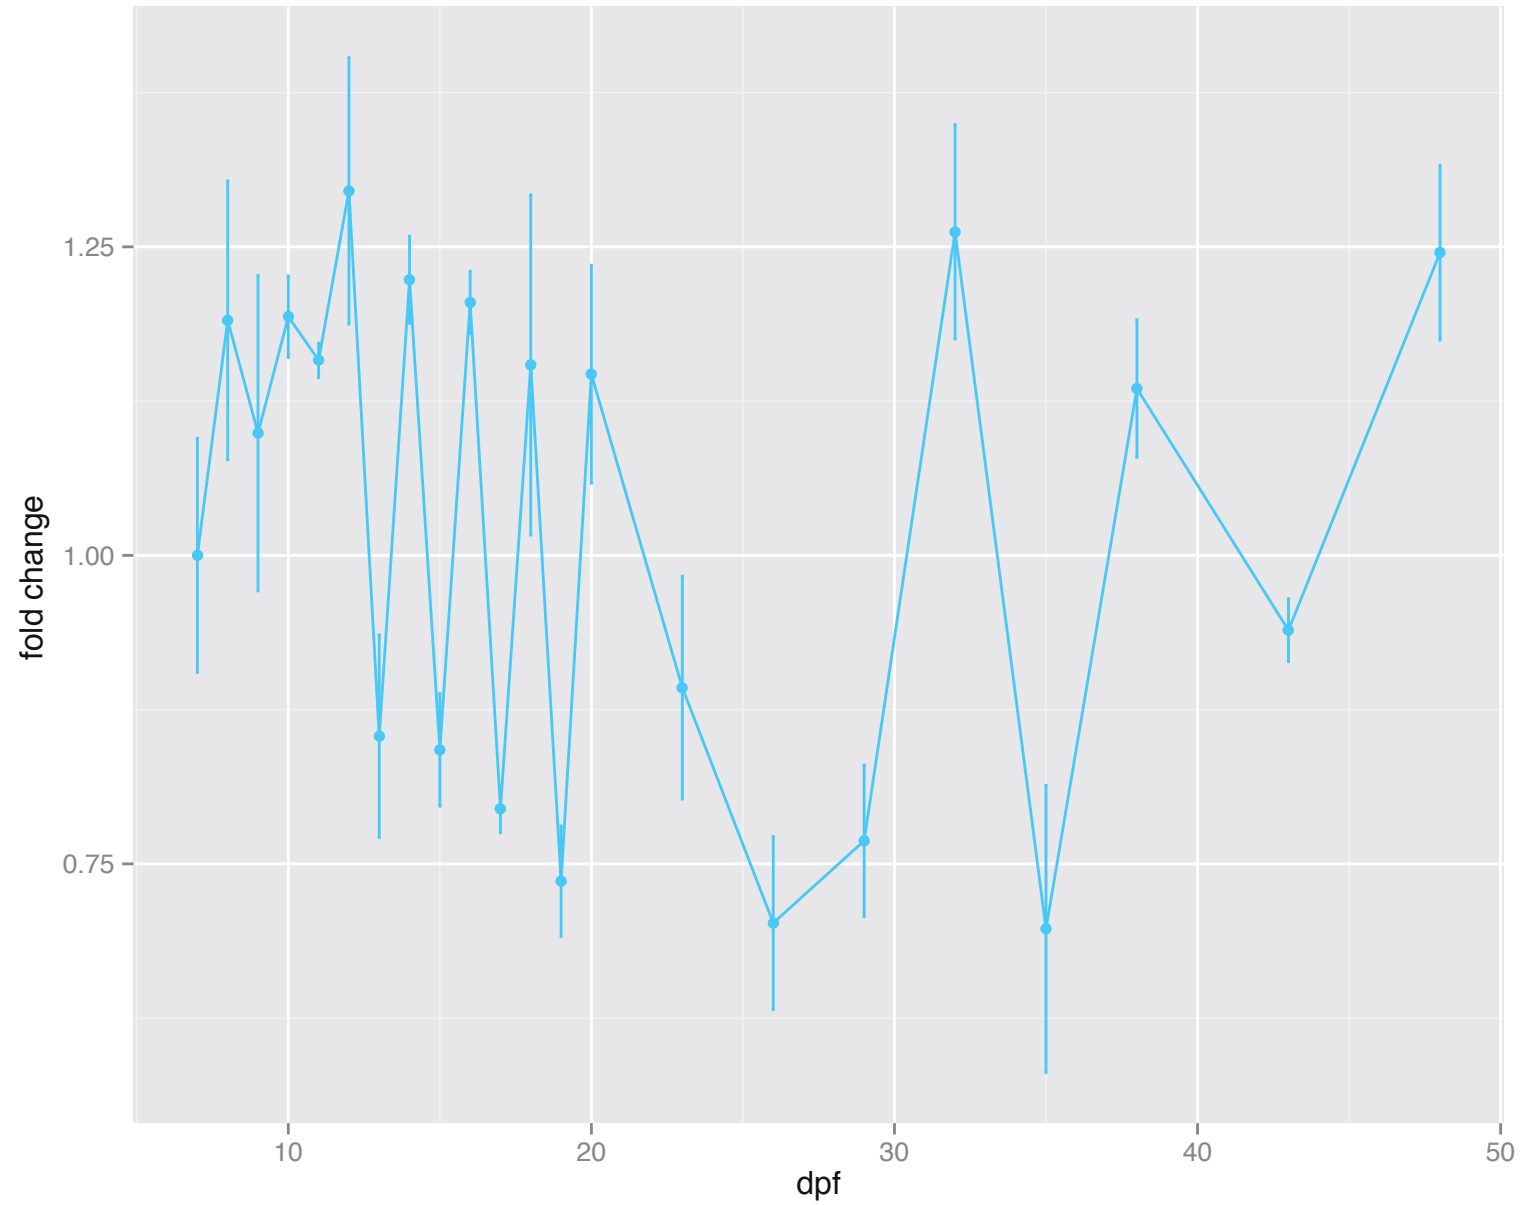

*wnt4A* in trunks

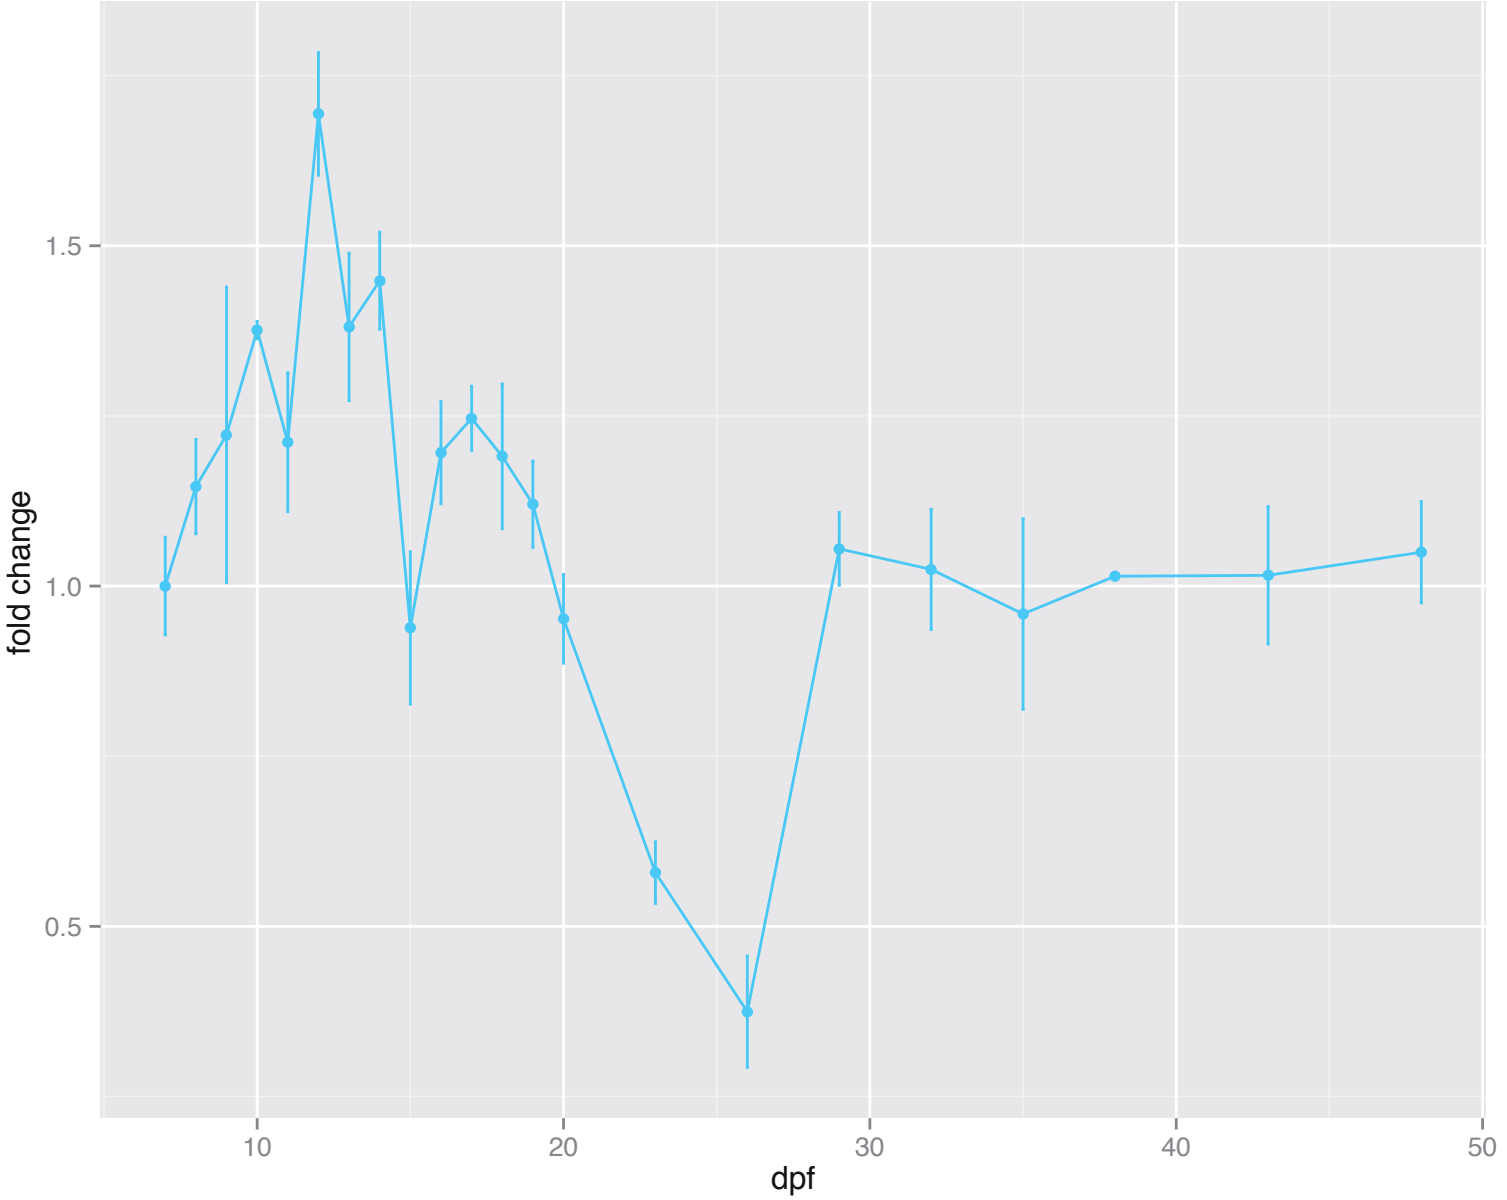

*wnt4B* in trunks

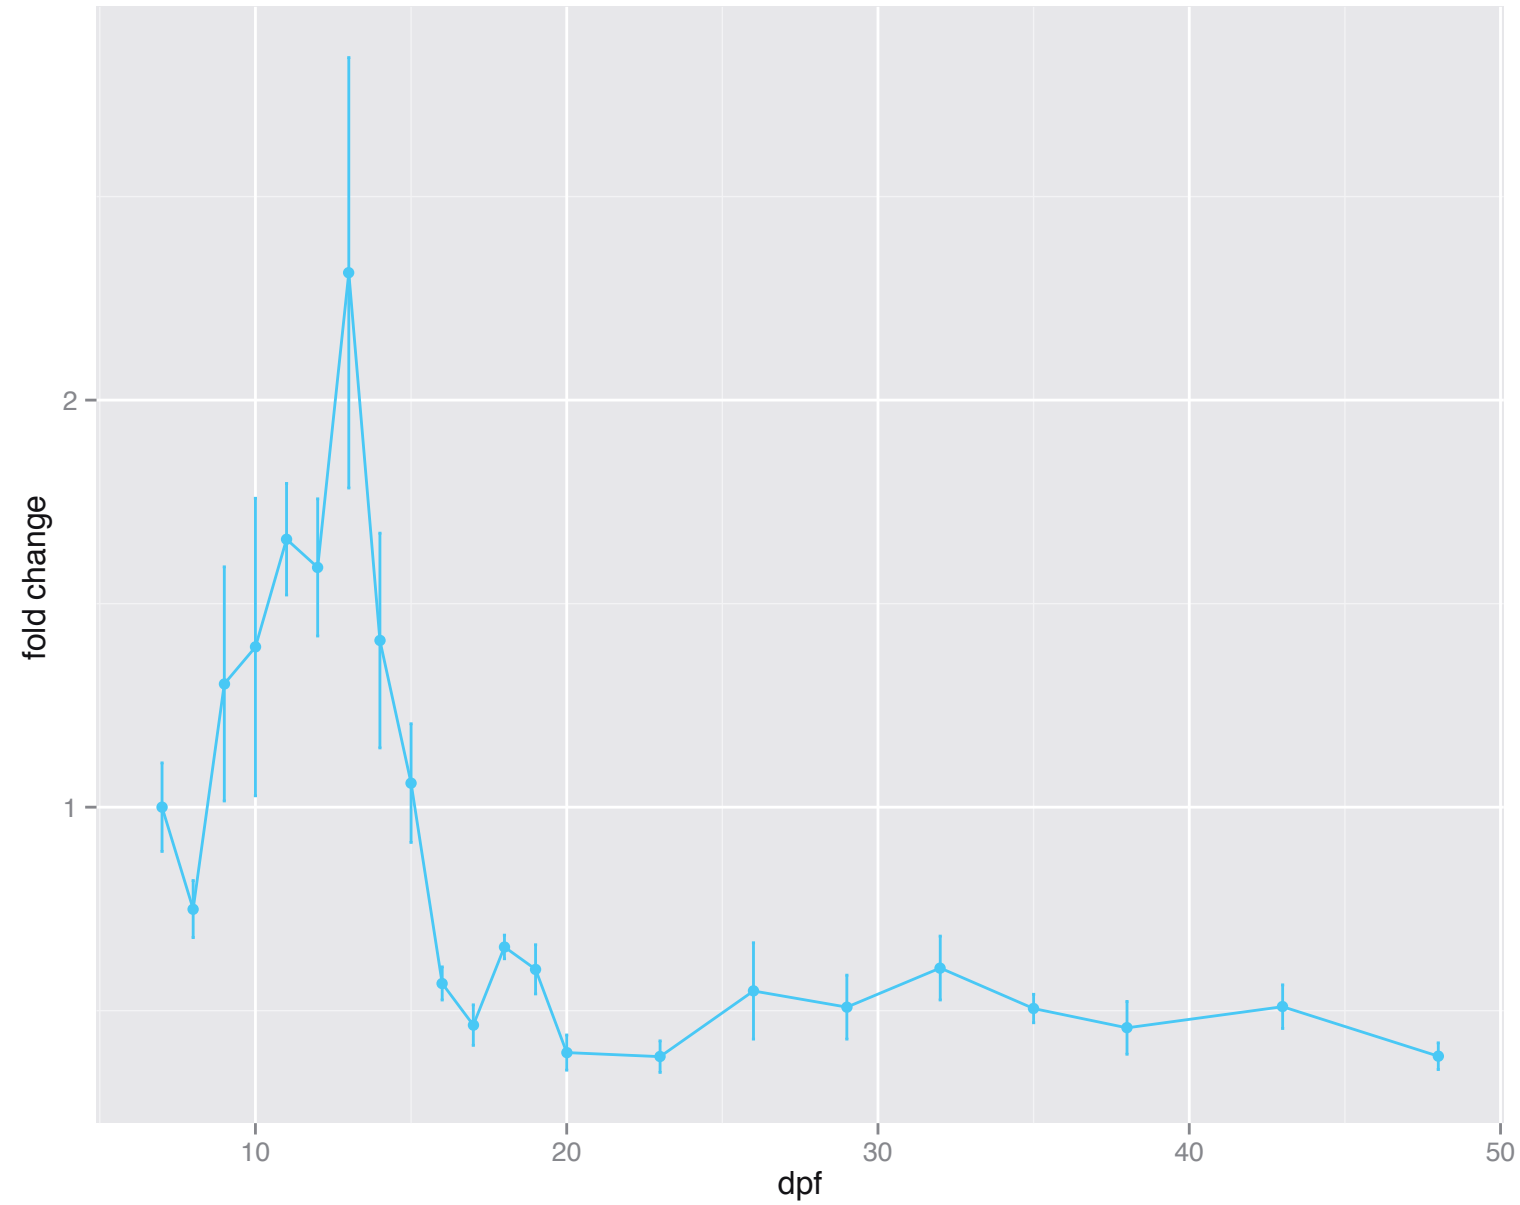

*wt1A* in trunks

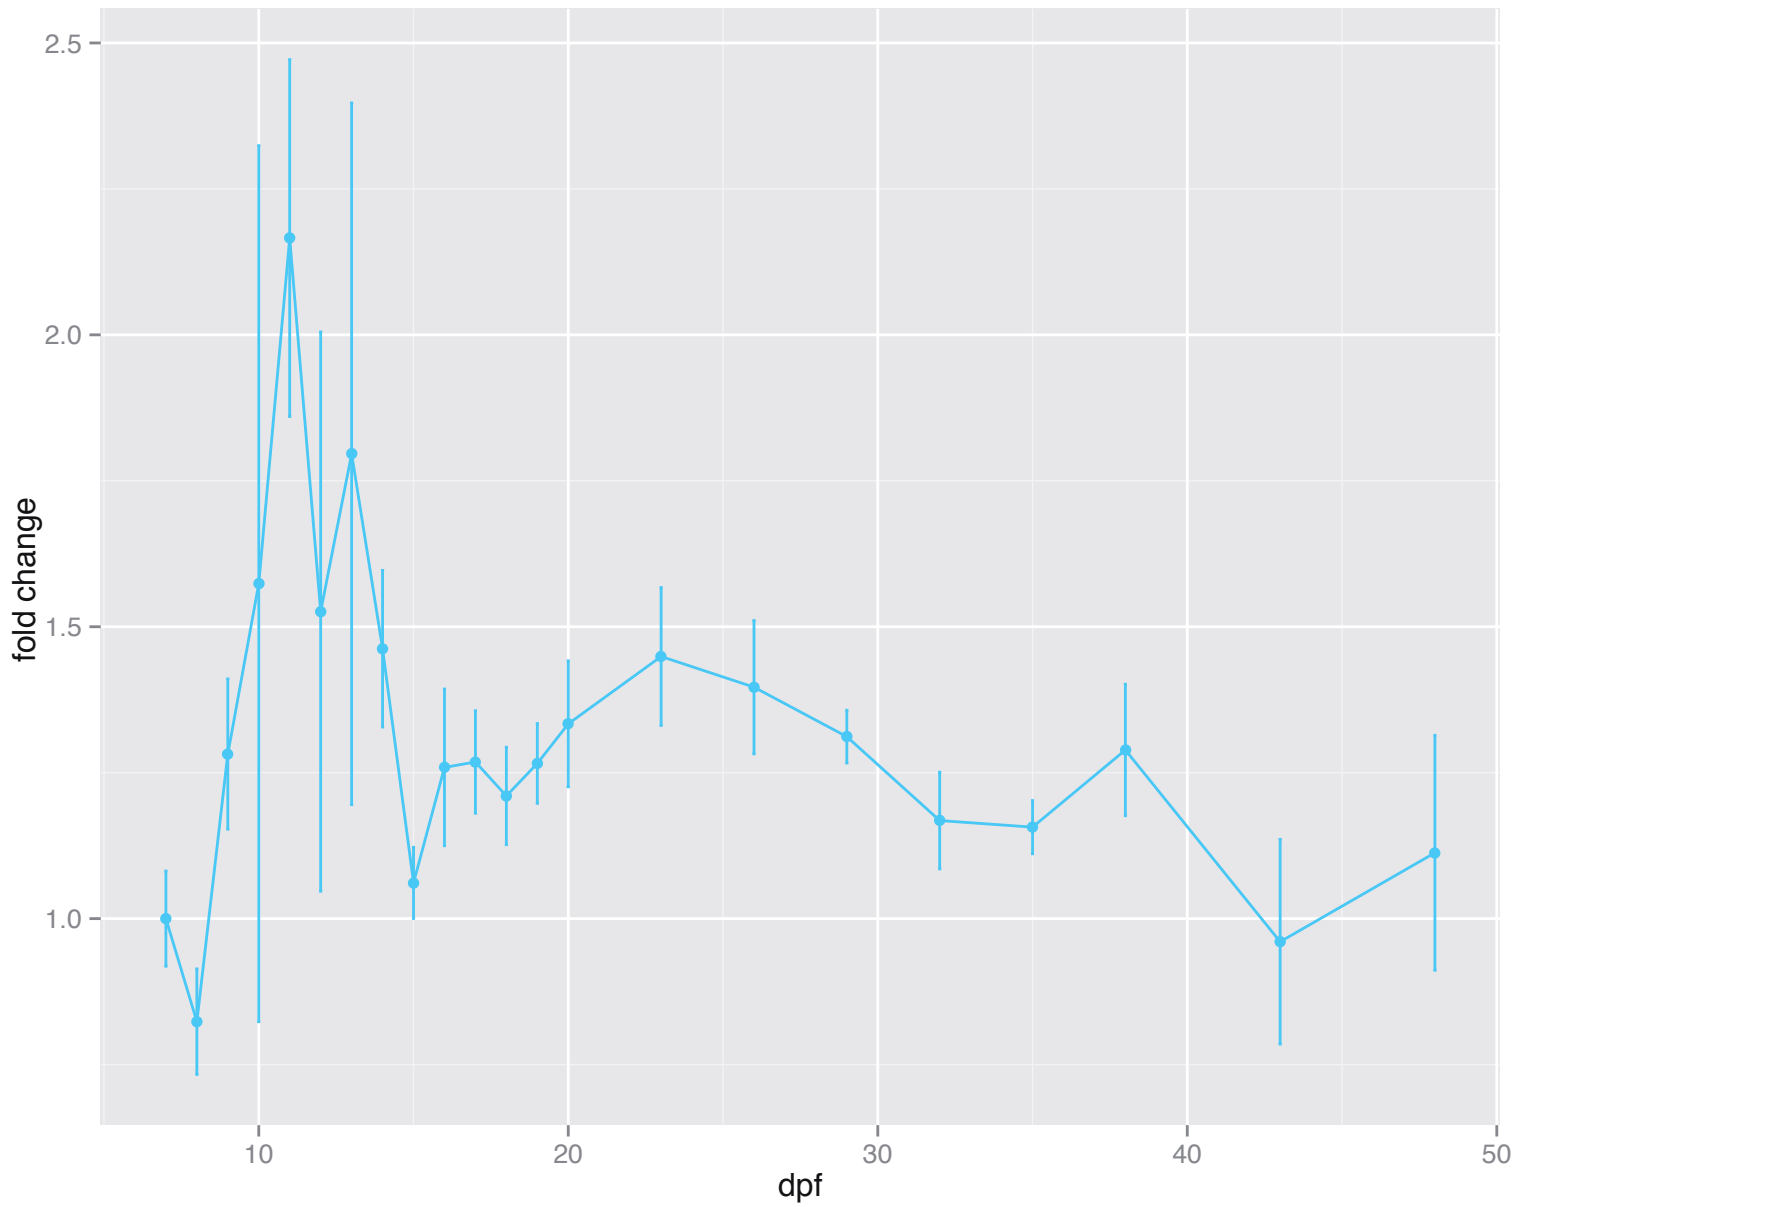

*wt1B* in trunks

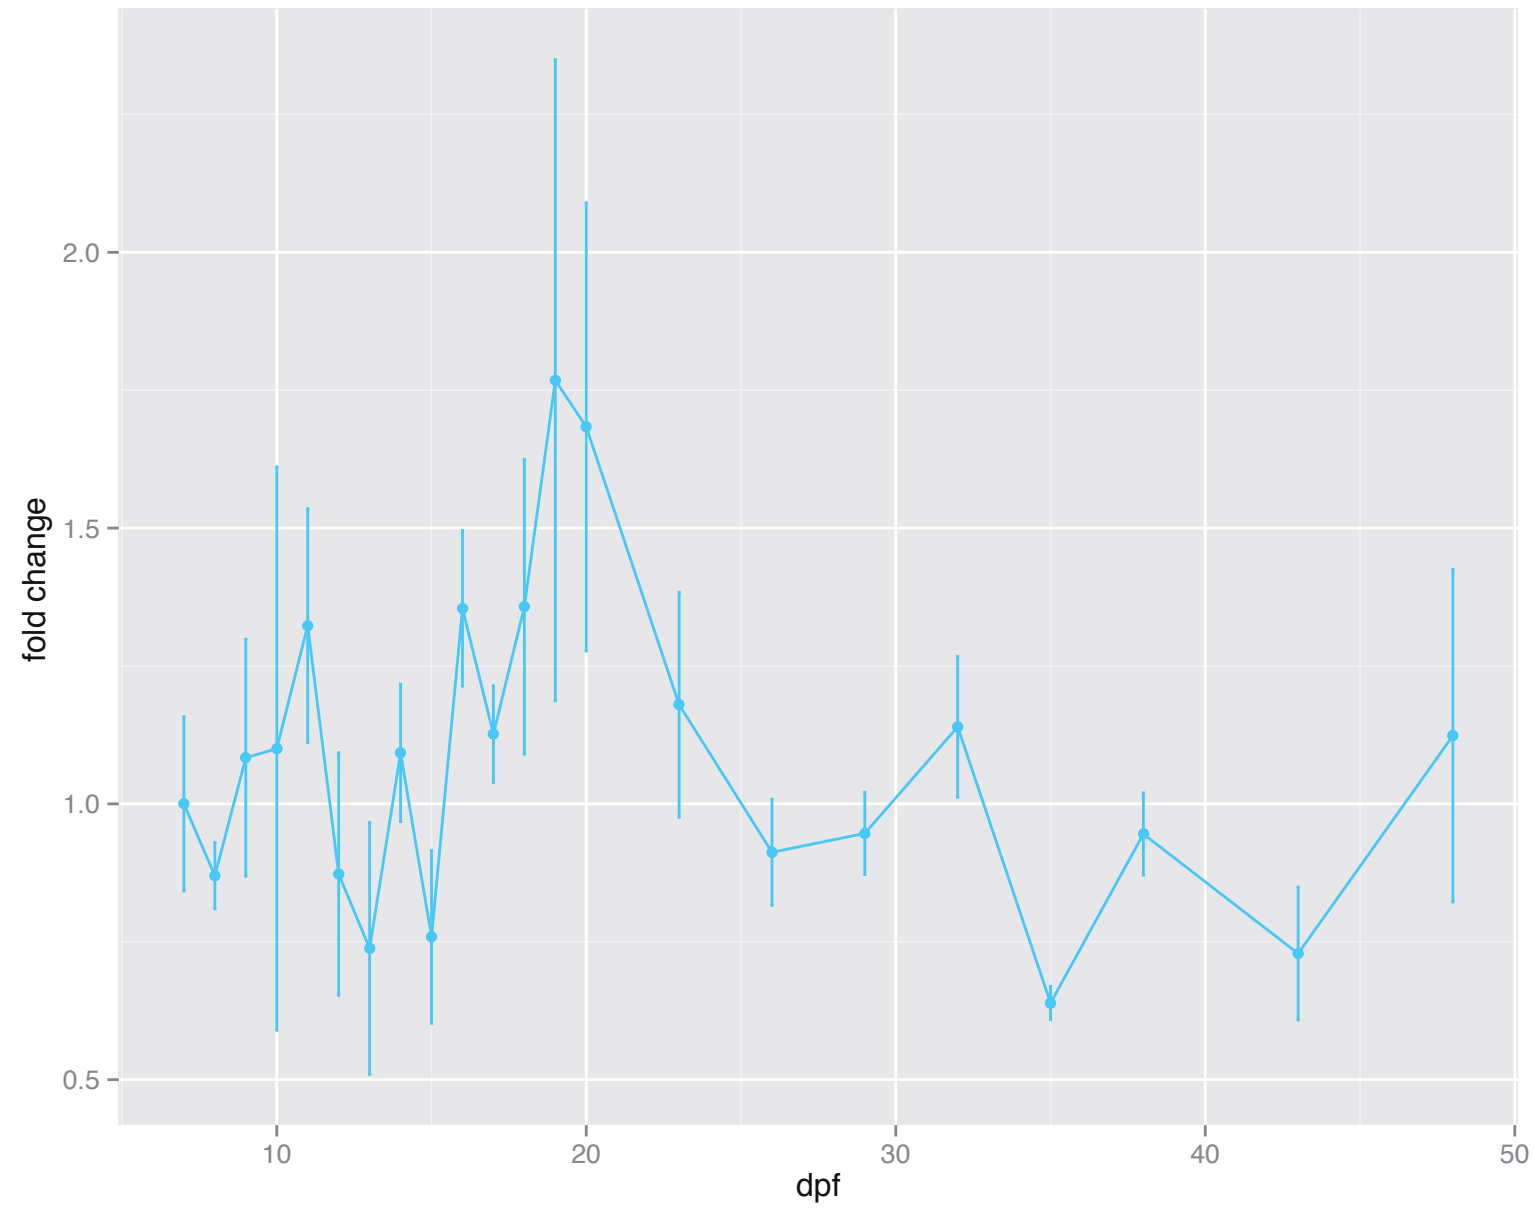

Supplement: 12863_2014_140_MOESM2_ESM.pdf [file 12863_2014_140_MOESM2_ESM.pdf]
